RESEARCH ARTICLE

# Knowledge, Attitudes, and Practices (KAP) Relating to Avian Influenza (H10N8) among Farmers' Markets Workers in Nanchang, China

Shengen Chen<sup>1</sup>✉, Zifen Li<sup>1,2</sup>✉, Maohong Hu<sup>1</sup>✉, Shuangli Guo<sup>1</sup>, Jingwen Wu<sup>1</sup>, Bin Wang<sup>1</sup>, Wei Hu<sup>1</sup>, Yanshuang Sun<sup>1</sup>, Hui Li<sup>1</sup>, Mingbin Liu<sup>1</sup>‡, Justin B. Moore<sup>3</sup>‡, Haiying Chen<sup>1</sup>\*

**1** Nanchang Centre for Disease Control and Prevention, Nanchang, Jiangxi Province, The People's Republic of China, **2** School of Public Health, Medical College of Nanchang University, Nanchang, Jiangxi Province, The People's Republic of China, **3** Department of Health Promotion, Education, and Behavior, Arnold School of Public Health, University of South Carolina, Columbia, South Carolina, United States of America

✉ These authors contributed equally to this work.

‡ These authors also contributed equally to this work.

\* [nccdcchy@126.com](mailto:nccdcchy@126.com)

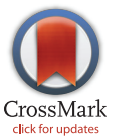

**OPEN ACCESS**

**Citation:** Chen S, Li Z, Hu M, Guo S, Wu J, Wang B, et al. (2015) Knowledge, Attitudes, and Practices (KAP) Relating to Avian Influenza (H10N8) among Farmers' Markets Workers in Nanchang, China. PLoS ONE 10(5): e0127120. doi:10.1371/journal.pone.0127120

**Academic Editor:** Jonas Waldenström, Linneaus University, SWEDEN

**Received:** October 10, 2014

**Accepted:** April 10, 2015

**Published:** May 18, 2015

**Copyright:** © 2015 Chen et al. This is an open access article distributed under the terms of the [Creative Commons Attribution License](http://creativecommons.org/licenses/by/4.0/), which permits unrestricted use, distribution, and reproduction in any medium, provided the original author and source are credited.

**Data Availability Statement:** These data and questionnaire are available as Supporting Information files.

**Funding:** This work was supported by Major Science and Technological Project (No. 20143ACG70004, to HC) from Department of Science and Technology of Jiangxi Province (<http://www.jxstc.gov.cn>). The funders had no role in study design, data collection and analysis, decision to publish, or preparation of the manuscript.

## Abstract

Three cases of avian influenza virus H10N8 were reported in Nanchang, China, as of April 2014. To identify the knowledge, attitudes, and practices (KAP) related to H10N8 among farmers' market workers, a cross-sectional survey was conducted in 63 farmers' markets in Nanchang. Using the resulting data, characteristics of poultry and non-poultry workers' knowledge, attitudes, and practice were described. Results suggest that interventions targeting high-risk workers should be developed and implemented by public health agencies to prevent the spread of H10N8. Additionally policies that encourage farmers' market workers to receive influenza vaccine should be developed, adopted, and enforced.

## Introduction

Based on the antigenic properties of the hemagglutinin (HA) and neuraminidase (NA) glycoproteins, influenza A viruses are categorized into 18 HA and 11 NA subtypes. All subtypes were identified initially from avian species, except for H17N10 and H18N11 subtype found in fruit bats [1, 2]. Among these subtypes, highly pathogenic avian influenza (HPAI) viruses are characterized by systemic infections, high mortality and morbidity, while low pathogenic avian influenza (LPAI) viruses usually cause asymptomatic infection or mild disease in poultry and wild birds. Occasionally, some HPAI and LPAI viruses, such as H5N1 and H7N9, can spread into humans and cause severe, sometimes fatal, disease, and pose a serious threat to the public's health. The first case of human infection with avian influenza virus (AIV) (H5N1) was detected in Hong Kong in 1997 [3]. As of March 20, 2015, the WHO has reported 430 deaths in 16 countries attributable to H5N1, with a case fatality ratio of 55% [4]. In March 2013, human

**Competing Interests:** The authors have declared that no competing interests exist.

infection with the novel avian influenza A virus (H7N9) was detected in Shanghai, China [5]. Subsequently, the H7N9 virus spread to more than 10 provinces and municipalities, mainly in eastern China. Between April and June 2013, 5 cases of H7N9 were identified in Nanchang, China, in the Jiangxi province [6]. Fortunately, all of the infected individuals in Nanchang survived, but as of February 23, 2015, H7N9 has caused 571 laboratory confirmed cases and 212 deaths in China [7]. In December 2013, a new strain of AIV (H10N8) was isolated from a fatal case of severe pneumonia in Nanchang [8], which initiated emergency response and enhanced active surveillance for H10N8 virus in patients with pneumonia, and in live poultry markets. Three laboratory-confirmed cases of H10N8 in humans had been reported from urban parts of Nanchang as of April 2014. Although no direct epidemiologic link has been established between these cases, all of the cases had a history of visiting local live poultry markets before onset of the illness, which suggests the possibility of a linkage between infection and live poultry. Samples collected from live poultry markets were identified positive for novel H10N8 virus.

Previous studies have demonstrated that live poultry markets play an important role in AIV transmission from birds to humans [9–11]. Live poultry markets are high-risk locations for human infection with AIV [12]. Therefore, poultry workers, elderly consumers, or those with compromised immune systems visiting the live poultry markets might be at high risk of infection. Despite the utility of preventive behaviors to aid poultry workers and customers in avoiding infection during outbreaks of AIV, these preventive behaviors are adopted at low rates by the public, and these low adoption rates are influenced by their perceptions of the effectiveness of control measures [13], infectiousness and severity of the disease [14], and reliability of the information provided by public health authorities [15]. Thus, learning about the knowledge, attitudes, and behaviors of the public is crucial to improve communication efforts by public health officials.

We carried out a cross-sectional survey of knowledge, attitudes, and practices (KAP) among workers at farmers' markets in Nanchang, China, to assess risk behaviors, preventive behaviors, and attitudes of the public in order to facilitate the development of effective prevention strategies against H10N8 infections.

## Methods

### Study sites and participants

The study was performed in 63 farmers' markets in all 9 districts and counties of Nanchang, Jiangxi Province, China. Nearly 95% of the poultry sold in these markets originated from the same wholesale market, located in Qingshanhu District. Two categories of study participants, poultry workers and non-poultry workers, were recruited by convenience sampling from the 63 farmers' markets. The poultry workers were defined as those involved in selling, slaughtering, plucking, cutting, or transporting poultry in the markets. The non-poultry workers included market managers, cleaners and those who sold vegetables, fish, meat or other foods in the markets. All subjects were local residents aged 17 to 75 years who provided written or verbal informed consent to participate in the investigation.

### Survey Methodology

The survey was conducted from December 29, 2013 through January 17, 2014, after the first case of H10N8 was reported. The investigators were local district or county Center for Disease Control and Prevention (CDC) staff members trained by officials from the Nanchang CDC. A self-designed, structured questionnaire was used to collect information on the general background of participants; knowledge, attitude, and practices (KAP) associated with avian influenza

H10N8; and information sources on H10N8. Each interview lasted for approximately 15 minutes. Most questions were closed-ended; participants were instructed to choose from a pre-existing set of answers (Yes/No/Unknown). Most variables derived from these questions were categorical, with the exception of age, which was captured as a continuous variable. KAP associated with H10N8 were compared between poultry workers and non-poultry workers. Knowledge was assessed using 10 items that inquired about possible transmission routes and practices for prevention of H10N8, and the knowledge score was calculated by summing scores for correct answers. An eight-item practice assessment was used to derive a practice score that was calculated by summing the number of preventative measures the individuals reported regularly engaging in since receiving the news of H10N8 identification.

## Statistical Analysis

Data from the questionnaires were entered in duplicate and verified using Epi Data software (Odense, Denmark; available at <http://www.epidata.dk/>). Data were analyzed with SPSS (version 13.0; SPSS Inc., Chicago, IL, USA). Medians and Interquartile range (IQR) values were calculated for continuous variables, and were compared between poultry workers and non-poultry workers using the Mann-Whitney U test. For categorical variables, frequencies for poultry and non-poultry workers were compared using chi-square tests and Fisher's exact tests. Knowledge questions were scored so that 3 points were assigned if the answer was 'Yes', 2 points were assigned for 'unknown', and 1 point was assigned for 'No'. For the practice score, 'Yes' was coded 1, while "No" was coded 0. To standardize scores for comparability between knowledge and practice, the knowledge and practice scores were adjusted (i.e., knowledge score/3; practice score\*1.25) to give a total score range of 0–10. Factors associated with participants' knowledge and practice scores were analyzed using multiple linear regression models, employing a step-wise selection method to select participant characteristic variables for the final model. The errors are unobservable random variables, assumed to have zero mean and uncorrelated elements, each with common variance. If the errors are normally distributed, so are the residuals. The histogram and normal P-P plot of regression-standardized residual indicated that the distributions of the residuals from the models were approximately normal, and the Durbin-Watson test indicated that the residuals were independent. We used the Akaike Information Criterion (AIC) to select the best model. For all analyses, pairwise deletion was employed, thus participants with missing values were excluded on a test-by-test basis. Two-tailed test were utilized with a p-value < 0.05 considered significant.

## Ethics

The study protocol and informed consent procedure were approved by the Ethics Committee of Nanchang CDC. All study participants provided either written (if literate) or verbal (if illiterate) informed consent. Consent was documented with the participants' signature or figure print if they were illiterate. Parent's written informed consent was obtained first if the participant was under the age of 18.

## Results

### Demographics

A total of 887 workers agreed to participate in the present study, including 319 poultry workers (mean age  $44.31 \pm 9.166$ , male 49.5%) and 568 non-poultry workers (mean age  $46.87 \pm 10.133$ , male 40.8%). Most participants reported an elementary school or junior high school education level (37.1% and 39.2%, respectively). Education level was higher in the poultry workers, which

**Table 1. Demography characteristics of farmers' market workers in Nanchang, China.**

| Characteristic                                                                | Poultry worker (n = 319) | Non-poultry worker (n = 568) | p-value* | Total (%)    |
|-------------------------------------------------------------------------------|--------------------------|------------------------------|----------|--------------|
| <b>Male (%)</b>                                                               | 158(49.5)                | 232(40.8)                    | 0.012    | 390(44.0)    |
| <b>Age (mean ± SD)</b>                                                        | 44.31±9.166              | 46.87±10.133                 | < 0.001  | 45.94 ±9.865 |
| <b>Education<sup>#</sup> (%)</b>                                              |                          |                              |          |              |
| Illiteracy                                                                    | 27(8.5)                  | 75(13.4)                     | < 0.001  | 102(11.6)    |
| Elementary school                                                             | 108(34.2)                | 217(38.8)                    |          | 325(37.1)    |
| Junior high school                                                            | 150(47.5)                | 193(34.5)                    |          | 343(39.2)    |
| Senior high school                                                            | 23(7.3)                  | 60(10.7)                     |          | 83(9.5)      |
| College and above                                                             | 8(2.5)                   | 15(2.7)                      |          | 23 (2.6)     |
| <b>Place of residence<sup>&amp;</sup> (%)</b>                                 |                          |                              | 0.714    |              |
| Living inside of the market                                                   | 27(8.9)                  | 43(8.2)                      |          | 70 (8.4)     |
| Living outside of the market                                                  | 276(91.1)                | 483(91.8)                    |          | 759(91.6)    |
| <b>Annual income, Yuan<sup>‡</sup> (%)</b>                                    |                          |                              | < 0.001  |              |
| <= 30,000                                                                     | 103(33.1)                | 316(57.5)                    |          | 419(48.7)    |
| 30,001–50,000                                                                 | 142(45.6)                | 168(30.5)                    |          | 310(36.0)    |
| 50,001–100,000                                                                | 58(18.6)                 | 62(11.3)                     |          | 120(13.9)    |
| > 100,000                                                                     | 8(2.6)                   | 4(0.7)                       |          | 12(1.4)      |
| <b>Contact with sick or dead poultry in the past month (%)</b>                | 35(11.0)                 | 4(0.7)                       | < 0.001  | 39(4.4)      |
| <b>Adopted protective measures after contacting with sick or dead poultry</b> | 25(71.4)                 | 2(50.0)                      | -        | 27(69.2)     |
| <b>Influenza vaccination in the last year</b>                                 | 3(0.9)                   | 0                            | 0.011**  | 3(0.3)       |

<sup>#</sup>11,

<sup>&</sup>58,

<sup>‡</sup>26 records were excluded from analysis due to existence of missing values.

\* Chi-square tests (Age: T-tests).

\*\* Fisher's exact tests.

doi:10.1371/journal.pone.0127120.t001

included 57.3% with an educational background of junior high school or higher, compared with 47.9% in non-poultry workers ( $p = 0.002$ ). A small percentage of poultry workers (8.9%) and non-poultry workers (8.2%) lived in the farmers' market. A significant difference was observed in annual income levels ( $p < 0.01$ ): 78.7% of poultry workers' annual incomes were under 50,000 Yuan, compared to 88.0% in non-poultry workers (GDP per capita in Nanchang was 64,678 Yuan in 2013).

Thirty-five (11.0%) poultry workers reported that they had experienced contact with sick or dead poultry in the last month, and 25 (71.4%) of them had used protective measures, such as wearing mask, gloves, work clothes and other equipment. Four (0.7%) non-poultry workers reported that they had experienced contact with sick or dead poultry in the last month, and two of them had used protective measures. Only three poultry workers reported that they had received seasonal influenza vaccine in the past year (Table 1).

### Information source and their association with behaviors related to H10N8

Awareness of H10N8 was low in both poultry workers (57.7%) and non-poultry workers (60.2%,  $p = 0.011$ ). Television was the most common information source (56.6%), followed by newspapers (25.5%), friends (10.7%), and the internet (5.7%). The majority (61.9%) of participants said they did not worry about being infected with H10N8, while 31.0% of participants

reported worry about H10N8 infection. Regarding participants' opinions on H10N8 information published by the government, 95.0% of participants thought the government issued the information in a timely manner, with only 7.7% of poultry workers and 3.6% of non-poultry workers reporting that the information was not timely. Twenty-four percent of participants were suspicious of government reports of H10N8. The percentages of participants who took additional individual precautions following the news of the H10N8 outbreak by wearing mask, gloves and overalls, and washing hands increased (27.2%, 24.3%, 49.6% and 70.9%, respectively). Only 38.5% participants reported regularly washing their hands with water and soap or hand sanitizer. Most participants (70.3%) ventilated their living quarters more frequently than before the news of the H10N8 outbreak, but a lower proportion of participants disinfected their stalls (22.8%). Poultry workers took more protective measures than non-poultry workers (practice scores 4.43 vs. 3.60,  $p < 0.001$ ), such as wearing a mask (33.2% vs. 24.0%,  $p = 0.018$ ); wearing overalls (55.4% vs. 46.5%,  $p = 0.037$ ); or sanitizing stalls (31.0% vs. 18.4%,  $p = 0.001$ ) ([Table 2](#) and [Table 3](#)).

## H10N8 KAP

KAP related to AIV are summarized in [Table 4](#). Regarding the preventive measures, approximately four-fifths of participants believed that avoiding contact with poultry, wearing personal protection when in contact with poultry, washing hands with water and soap or sanitizer after touching poultry, and physical exercise can prevent infection with AIV (79.6%, 78.8%, 83.2% and 82.6%, respectively). Regarding the risk factors for infection with H10N8, the greatest proportion of participants believed that touching sick or dead poultry may cause infection (76.6%), followed by slaughtering or processing (58.6%), feeding (57.7%), and transporting live poultry (55.6%). These values were significantly higher in non-poultry workers than in poultry workers (79.4% vs. 71.5%, 62.5% vs. 51.7%, 62.9% vs. 48.6% and 59.3% vs. 48.9%, respectively). There were also 36.2% participants who believed that selling frozen poultry products might cause infection with H10N8. Only one-fifth of participants believed that frequent visits to farmers' market might cause infection with H10N8. The non-poultry workers displayed higher AIV knowledge scores than the poultry workers (8.52 vs. 8.07,  $p < 0.001$ ) ([Table 3](#)).

Over 80% participants of both groups thought that keeping good hand hygiene and sanitizing farmers' markets regularly could prevent H10N8 infection. Nearly 31% of poultry workers and 40% of non-poultry workers said they would rather use home remedies than seek medical advice when they felt sick, but 12.7% of poultry workers and 11.2% of non-poultry workers believed that they would recover from AIV infection without any treatment. Over 60% of participants in both groups indicated support for the item 'sanitize often, but do not close the market'. Nearly 7.5% of participants in the poultry and non-poultry workers supported 'neither close nor sanitize the markets' ([Table 4](#)).

## Multiple regression analysis

Factors associated with participants' KAP scores are summarized in [Table 5](#) and [Table 6](#). Briefly, age, education level, place of residence, occupation, annual income and concern about infection with H10N8 were significantly associated with knowledge score ([Table 5](#)). The participants who live outside of the market or were a non-poultry worker had lower practice scores (Unstandardized coefficients -1.505 and -0.896, respectively). The participants who were worried, or very worried about infection with H10N8 had taken more protective measures than those who did not worry (Unstandardized coefficients 0.556, and 1.222, respectively).

**Table 2. Information sources and reactions of farmers' market workers after occurrence of H10N8 infection in humans in Nanchang, China.**

| Characteristic                                                                                      |                                                         | Poultry worker<br>(n = 319) | Non-poultry<br>worker (n = 568) | p-<br>value* | Total<br>(%)  |
|-----------------------------------------------------------------------------------------------------|---------------------------------------------------------|-----------------------------|---------------------------------|--------------|---------------|
| <b>Having heard about H10N8</b>                                                                     |                                                         | 184(57.7)                   | 342(60.2)                       | 0.470        | 526<br>(59.3) |
| <b>H10N8 Information source</b>                                                                     | Television                                              | 112(60.9)                   | 185(54.3)                       | 0.171        | 297<br>(56.6) |
|                                                                                                     | Newspaper                                               | 39(21.2)                    | 95(27.9)                        |              | 134<br>(25.5) |
|                                                                                                     | Internet                                                | 14(7.6)                     | 16(4.7)                         |              | 30(5.7)       |
|                                                                                                     | Friend                                                  | 16(8.7)                     | 41(7.2)                         |              | 57<br>(10.9)  |
|                                                                                                     | Others                                                  | 3(1.6)                      | 4(0.7)                          |              | 7(1.3)        |
| <b>Worry about being infected with H10N8<sup>#</sup></b>                                            | Don't worry                                             | 206(66.7)                   | 326(59.3)                       | 0.072        | 532<br>(61.9) |
|                                                                                                     | Worry                                                   | 81(26.2)                    | 185(33.6)                       |              | 266<br>(31.0) |
|                                                                                                     | Very worry                                              | 22(7.1)                     | 39(7.1)                         |              | 61(7.1)       |
| <b>How do you think about the information of H10N8 released by the government? <sup>&amp;</sup></b> | Credible                                                | 146(79.8)                   | 249(73.9)                       | 0.003**      | 395<br>(76.0) |
|                                                                                                     | Partly credible, partly concealed                       | 29(15.8)                    | 85(25.2)                        |              | 114<br>(21.9) |
|                                                                                                     | Less credible                                           | 7(3.8)                      | 2(0.6)                          |              | 9(1.7)        |
|                                                                                                     | Totally incredible                                      | 1(0.5)                      | 1(0.3)                          |              | 2(0.4)        |
| <b>Do you think the government issued the information of H10N8 timely or not? <sup>&amp;</sup></b>  | Very timely                                             | 99(54.7)                    | 177(52.2)                       | 0.122**      | 276<br>(53.1) |
|                                                                                                     | Timely                                                  | 68(37.6)                    | 150(44.2)                       |              | 218<br>(41.9) |
|                                                                                                     | Not timely                                              | 4(2.2)                      | 3(0.9)                          |              | 7(1.3)        |
|                                                                                                     | It doesn't matter                                       | 10(5.5)                     | 9(2.7)                          |              | 19(3.7)       |
| <b>Protective measures adopted</b>                                                                  | Wearing mask                                            | 61(33.2)                    | 82(24.0)                        | 0.018        | 143<br>(27.2) |
|                                                                                                     | Wearing gloves                                          | 46(25.0)                    | 82(24.0)                        | 0.745        | 128<br>(24.3) |
|                                                                                                     | Wearing overalls                                        | 102(55.4)                   | 159(46.5)                       | 0.037        | 261<br>(49.6) |
|                                                                                                     | Washing hands                                           | 139(75.5)                   | 234(68.4)                       | 0.038        | 373<br>(70.9) |
|                                                                                                     | Washing hands without soap                              | 82(60.7)                    | 140(61.9)                       | 0.820        | 222<br>(61.5) |
|                                                                                                     | Washing hands with soap or hand sanitizer               | 53(39.3)                    | 86(38.1)                        |              | 139<br>(38.5) |
|                                                                                                     | Sanitizing stall                                        | 57(31.0)                    | 63(18.4)                        | 0.001        | 120<br>(22.8) |
|                                                                                                     | Increasing the frequency of disinfection                | 36(19.6)                    | 53(15.5)                        | 0.244        | 89<br>(16.9)  |
|                                                                                                     | Ventilation                                             | 141(76.6)                   | 229(67.0)                       | 0.032        | 370<br>(70.3) |
|                                                                                                     | Covering nose and mouth with a handkerchief when sneeze | 58(31.5)                    | 83(24.3)                        | 0.084        | 141<br>(26.8) |

<sup>#</sup>28,

<sup>&</sup>6 records were excluded from analysis due to existence of missing values.

\* Chi-square tests.

\*\*Fisher's exact tests.

doi:10.1371/journal.pone.0127120.t002

**Table 3. Knowledge and practice scores in farmers' market workers in Nanchang, China.**

| Characteristic  |                             | Mean       | Median | IQR       | Z*     | p-value |
|-----------------|-----------------------------|------------|--------|-----------|--------|---------|
| Knowledge score | Poultry worker(N = 317)     | 8.07±1.492 | 8.33   | 6.67–9.33 | -3.967 | < 0.001 |
|                 | Non-poultry worker(N = 560) | 8.52±1.218 | 9.00   | 7.67–9.67 |        |         |
| Practice score  | Poultry worker(N = 319)     | 4.43±2.862 | 3.75   | 2.50–6.25 | -4.324 | < 0.001 |
|                 | Non-poultry worker(N = 568) | 3.60±2.781 | 3.75   | 1.25–5.00 |        |         |

\*The Z statistic was obtained from the Mann-Whitney test for two independent samples. IQR, interquartile range.

doi:10.1371/journal.pone.0127120.t003

## Discussion

To date, three patients have been confirmed to be infected with H10N8 in Nanchang, China. All of them had visited live poultry markets before onset of disease. Studies examining human infections with AIV indicate that visiting live poultry market is a potential risk factor [7, 16]. The farmers' market workers are regarded as a high-risk population for infection with AIV. However, our results suggest that the awareness of human infection with H10N8 is low in both poultry and non-poultry farmers' market workers. Television was the main information source for H10N8 information in both groups, similar to the results found in studies of H5N1 KAP in Thailand and Vietnam [17, 18]. More than one in ten (11.0%) poultry workers reported an instance of contact with sick or dead poultry, compared with 0.7% of non-poultry workers, indicating that the poultry workers were more frequently exposed to the potentially contaminated animals. Studies have demonstrated that direct contact with sick or diseased poultry is the major risk factor for human infections with H5N1 [19]. Our study showed that more participants in both groups reported strengthening individual precautions following the H10N8 discovery by washing hands, but, only 36.5% of them washed hands with soap or hand sanitizer. Grayson and colleagues demonstrated that washing hands with soap and water is the most effective intervention in reducing influenza A virus infection in humans [20]. We also found low reported rates of protective measures, such as wearing a mask, wearing gloves, or sanitizing stalls. In contrast, these measures were relatively common in Italian poultry workers, as 87.9% washed hands, 59.9% wore gloves and 59.9% wore protective masks [21]. Generally, preventive measures are more common in those with greater knowledge, but that was not the case in the current study. In the current sample, the poultry workers reported more protective measures, but their knowledge scores were lower than the non-poultry workers. This may be because of the different occupation exposure, as the non-poultry workers may think that wearing a mask and gloves is unnecessary, especially those individuals working as a market manager or a vegetable vendor. In our multivariable analyses, H10N8 knowledge was predicted by education level, place of resident, occupation, and concern about infection with H10N8. Similar to a previous study, we found that the level of education was an important predictor of AIV knowledge [18], despite the low levels of education in the present sample. In addition, the results indicate that participants who lived outside the market had higher knowledge scores but lower practice scores compared to those who lived in the market. However, due to the cross-sectional nature of our study, our data cannot be used to determine whether increases in the practice of preventive measures among those living in the market resulted from increased awareness. The relatively low levels of preventive practices may be attributable to the low perceived threat reported by the workers, evidenced by the majority of participants (61.9%) reporting lack of worry about infection with H10N8. This lack of concern could be potentially due to the low number of individuals affected by the most recent outbreak. An encouraging finding was that the

**Table 4. Knowledge-attitude related to H10N8 in farmers' market workers in Nanchang, China.**

| Characteristic                                                                                     |                                                                 | Poultry worker (n = 319) | Non-poultry worker (n = 568) | p-value* | Total (%)  |
|----------------------------------------------------------------------------------------------------|-----------------------------------------------------------------|--------------------------|------------------------------|----------|------------|
| <b>Which measures can prevent you from infecting with H10N8?*</b>                                  | Avoiding contact with poultry                                   | 221(69.3)                | 485(85.4)                    | < 0.001  | 706 (79.6) |
|                                                                                                    | Taking personal protective equipments when contact with poultry | 248(77.7)                | 451(79.4)                    | 0.506    | 699 (78.8) |
|                                                                                                    | Washing hands with soap or sanitizer after touching poultry     | 256(80.3)                | 482(84.9)                    | 0.141    | 738 (83.2) |
|                                                                                                    | Physical exercise                                               | 258(80.9)                | 475(83.6)                    | 0.436    | 733 (82.6) |
| <b>Which exposure may lead to infection with H10N8? *</b>                                          | Touching sick or dead poultry                                   | 228(71.5)                | 451(79.4)                    | 0.001    | 679 (76.6) |
|                                                                                                    | Feeding live poultry                                            | 155(48.6)                | 357(62.9)                    | < 0.001  | 512 (57.7) |
|                                                                                                    | Transporting live poultry                                       | 156(48.9)                | 337(59.3)                    | 0.002    | 493 (55.6) |
|                                                                                                    | Slaughtering or processing live poultry                         | 165(51.7)                | 355(62.5)                    | 0.002    | 520 (58.6) |
|                                                                                                    | Selling frozen poultry products                                 | 106(33.2)                | 215(37.9)                    | 0.029    | 321 (36.2) |
|                                                                                                    | Often go to the farmers' market                                 | 65(20.4)                 | 126(22.21)                   | 0.244    | 191 (21.5) |
| <b>What will you do if you are sick with fever, sneeze, and cough? #</b>                           | Purchasing cold medicine by myself                              | 97(30.7)                 | 225(40.0)                    | 0.045    | 322 (36.7) |
|                                                                                                    | Seeking medical service from private clinic                     | 119(37.7)                | 190(33.8)                    |          | 309 (35.2) |
|                                                                                                    | Seeking medical service from hospital                           | 60(19.08.8)              | 84(14.9)                     |          | 144 (16.4) |
|                                                                                                    | With none treatment                                             | 40(12.7)                 | 63(11.2)                     |          | 103 (11.7) |
| <b>Do you support the following H10N8 control measures implemented in farmers' markets? &amp;</b>  | Closure and sanitization of markets                             | 43(13.6)                 | 100(17.9)                    | 0.409    | 143 (16.3) |
|                                                                                                    | Sanitization but not closure of markets                         | 213(67.2)                | 355(63.5)                    |          | 568 (64.8) |
|                                                                                                    | Neither closure nor sanitization of markets                     | 25(7.9)                  | 40(7.2)                      |          | 65(7.4)    |
|                                                                                                    | Slaughtering all poultry in markets                             | 36(11.4)                 | 64(11.4)                     |          | 100 (11.4) |
| <b>Do you believe that keeping good hand hygiene could prevent infection with H10N8? *</b>         |                                                                 | 270(84.6)                | 512(90.1)                    | 0.019    | 782 (88.2) |
| <b>Do you believe that sanitization of markets regularly could prevent infection with H10N8? *</b> |                                                                 | 259(81.2)                | 456(80.3)                    | 0.236    | 715 (80.6) |

#9,

&11 records were excluded from analysis due to existence of missing values.

\*Numbers of the participants whose answer was Yes.

\*\*Chi-square tests.

doi:10.1371/journal.pone.0127120.t004

participants who worried about H10N8 infection displayed higher knowledge and practice scores than those who did not. These results suggest that government needs to strengthen health education messages, with targeting to high-risk populations (such as farmers' market



**Table 5. Multiple regression analysis for possible influencing factors of knowledge scores among farmers' market workers in Nanchang, China.**

| Factors                                   |                                 | Coefficients* | Standard error | t      | p-value |
|-------------------------------------------|---------------------------------|---------------|----------------|--------|---------|
| <b>Constant</b>                           |                                 | 6.454         | 0.424          | 15.218 | < 0.001 |
| <b>Age</b>                                | 17–29 <sup>#</sup>              | -             | -              | -      | -       |
|                                           | 30–39                           | -0.541        | 0.223          | -2.428 | 0.015   |
|                                           | 40–49                           | -0.510        | 0.210          | -2.427 | 0.015   |
|                                           | 50–59                           | -0.305        | 0.218          | -1.402 | 0.161   |
|                                           | > = 60                          | -0.532        | 0.260          | -2.048 | 0.041   |
| <b>Education level</b>                    | Illiteracy <sup>#</sup>         | -             | -              | -      | -       |
|                                           | Elementary school               | 0.310         | 0.153          | 2.024  | 0.043   |
|                                           | Junior high school              | 0.556         | 1.159          | 3.506  | < 0.001 |
|                                           | Senior high school              | 0.508         | 0.208          | 2.450  | 0.015   |
|                                           | College and above               | 0.898         | 0.319          | 2.817  | 0.005   |
| <b>Place of resident</b>                  | Live in the market <sup>#</sup> | -             | -              | -      | -       |
|                                           | Live outside of the market      | 0.488         | 0.163          | 2.984  | 0.003   |
| <b>Occupation</b>                         | Poultry worker <sup>#</sup>     | -             | -              | -      | -       |
|                                           | Non-poultry worker              | 0.510         | 0.098          | 5.225  | < 0.001 |
| <b>Annual Income, Yuan</b>                | < = 30,000 <sup>#</sup>         | -             | -              | -      | -       |
|                                           | 30,001–50,000                   | 0.146         | 0.105          | 1.396  | 0.163   |
|                                           | 50,001–100,000                  | 0.061         | 0.140          | 0.437  | 0.662   |
|                                           | > 100,000                       | -0.849        | 0.395          | -2.148 | 0.032   |
| <b>Worry about be infected with H10N8</b> | Don't worry <sup>#</sup>        | -             | -              | -      | -       |
|                                           | Worry                           | 0.325         | 0.101          | 3.208  | 0.001   |
|                                           | Very worry                      | 0.622         | 0.179          | 3.480  | 0.001   |

<sup>#</sup>Reference group.

\*Unstandardized coefficients.

doi:10.1371/journal.pone.0127120.t005

workers) emphasizing susceptibility to infection and increased performance of health protective behaviors.

Efficacious and safe vaccines remain the cornerstone of influenza prophylaxis in most countries [22]. In 2014, it was reported that the influenza vaccination rate in China was between 2% and 3% [23], with the highest rates in urban areas. For example, the 2009 the rate of influenza vaccination in Beijing was close to those observed in developed countries [24]. However, the

**Table 6. Multiple regression analysis for possible influencing factors of practice scores among farmers' market workers in Nanchang, China.**

| Factors                                   |                                 | Coefficients* | Standard error | t      | p-value |
|-------------------------------------------|---------------------------------|---------------|----------------|--------|---------|
| <b>Constant</b>                           |                                 | 8.024         | 0.747          | 10.74  | < 0.001 |
| <b>Place of resident</b>                  | Live in the market <sup>#</sup> | -             | -              | -      | -       |
|                                           | Live outside of the market      | -1.505        | 0.348          | -4.321 | < 0.001 |
| <b>Occupation</b>                         | Poultry worker <sup>#</sup>     | -             | -              | -      | -       |
|                                           | Non-poultry worker              | -0.896        | 0.202          | -4.448 | < 0.001 |
| <b>Worry about be infected with H10N8</b> | Don't worry <sup>#</sup>        | -             | -              | -      | -       |
|                                           | Worry                           | 0.556         | 0.215          | 2.591  | 0.010   |
|                                           | Very worry                      | 1.222         | 0.381          | 3.210  | 0.001   |

<sup>#</sup>Reference group.

\*Unstandardized coefficients.

doi:10.1371/journal.pone.0127120.t006

influenza vaccination rates in our participants recruited from Nanchang were considerably lower than Beijing (i.e., less than 1%). As indicated in Li's 2014 study, worry about infection was found to be the strongest predictor of vaccination uptake [25]. As such, the low level of concern regarding AIV infection expressed by workers is cause for alarm. The results indicate that staff of farmers' markets did not attach importance to prevention and treatment of AIV. This attitude can potentially delay diagnosis and initiation of antiviral administration, and is not conducive to the prevention and control of human acquisition of AIV. As a result, improving access and utilization of healthcare by farmers' market workers should be a target of public health agencies in China.

A study conducted in Hong Kong [26] showed that closing the live poultry markets two times a month could effectively reduce the rate of AIV infection. At present, the management measures implemented in Nanchang's live poultry markets were to clean and disinfect daily, and close one day per month. In our study, only 13.6% of participating poultry workers and 17.9% of non-poultry workers supported the strategy of closure and disinfection of the market. Support for regularly disinfecting, but not closing, the market was 67.2% and 63.5% in poultry and non-poultry workers, respectively. The main reason was that market closure may seriously reduce the poultry workers' income [27], thus financial compensation or reducing market stall rent may help poultry workers accept closure strategies more readily.

The results of the present study should be considered in light of a number of limitations. First, our questionnaire did not query participants for their reasoning behind their AIV related attitudes. For example, questions like 'why don't you worry about infection with H10N8' or 'why don't you receive the influenza vaccination', which could elucidate the possible relationship between AI attitudes, were missing. Additionally, no objective information, such as direct observation, was collected to confirm the self-reported behaviors. As such, the responses may have been influenced by social desirability. These limitations could be addressed in future investigations.

## Conclusions

The occurrence of H10N8 had not caused public panic yet, but the KAP of H10N8 in farmers' market workers was not optimal. Interventions, potentially targeting high-risk workers, should be developed and implemented by public health agencies to prevent the spread of H10N8. Additionally, policies that encourage farmers' market workers to receive influenza vaccine should be developed, adopted, and enforced. Hopefully, the present findings will provide a better understanding of influenza risk communication and education needs of farmers' market workers in Nanchang and other underdeveloped cities in China.

## Supporting Information

**S1 Dataset. KAP associated with avian influenza H10N8 on farmers' market workers gathered from 29 December 2013 to 17 January 2014.** This is the original database that matched by the questionnaire.

(XLS)

**S1 Questionnaire. KAP associated with avian influenza H10N8 on farmers' market workers.** A self-designed, structured questionnaire was used to collect information on the general background of participants; knowledge, attitude, and practices (KAP) associated with avian influenza H10N8.

(DOC)

## Acknowledgments

We are grateful to the staffs of the Donghu District Center for Disease Control and Prevention (CDC), Xihu District CDC, Qingshanhu District CDC, Wanli District CDC, Qingyunpu District CDC, Xinjian County CDC, Anyi County CDC and Jinxian County CDC for their excellent assistance during the field investigation.

## Author Contributions

Conceived and designed the experiments: HC SC ML. Performed the experiments: JW SG BW WH YS HL. Analyzed the data: ZL MH. Wrote the paper: SC ZL MH ML JBM.

## References

1. Tong S, Li Y, Rivaller P, Conrardy C, Castillo DA, Chen LM, et al. (2012) A distinct lineage of influenza A virus from bats. *Proc Natl Acad Sci USA* 109(11): 4269–4274. doi: [10.1073/pnas.1116200109](https://doi.org/10.1073/pnas.1116200109) PMID: [22371588](https://pubmed.ncbi.nlm.nih.gov/22371588/)
2. Tong S, Zhu X, Li Y, Shi M, Zhang J, Bourgeois M, et al. (2013) New world bats harbor diverse influenza A viruses. A distinct lineage of influenza A virus from bats. *PLoS Pathog* 9(10): e1003657. doi: [10.1371/journal.ppat.1003657](https://doi.org/10.1371/journal.ppat.1003657) PMID: [24130481](https://pubmed.ncbi.nlm.nih.gov/24130481/)
3. Yuen KY, Chan PK, Peiris M, Tsang DN, Que TL, Shorridge KF, et al. (1998) Clinical features and rapid viral diagnosis of human disease associated with avian influenza A H5N1 virus. *Lancet* 351: 467–71. PMID: [9482437](https://pubmed.ncbi.nlm.nih.gov/9482437/)
4. World Health Organization. (20 March 2015) Avian influenza weekly update number 475: Human infection with avian influenza A (H5N1) virus. Available: [http://www.wpro.who.int/emerging\\_diseases/AvianInfluenza/en/](http://www.wpro.who.int/emerging_diseases/AvianInfluenza/en/). Accessed 8 April 2015.
5. World Health Organization. (1 April 2013) Human infection with influenza A (H7N9) virus in China. Available: [http://www.who.int/csr/don/2013\\_04\\_01/en/](http://www.who.int/csr/don/2013_04_01/en/). Accessed 20 September 2014.
6. Zhou X, Li H, Ni X, Liu M, Hu M, Wu J, et al. (2013) Laboratory diagnosis and epidemiology of avian influenza A (H7N9) virus infection in humans in Nanchang city, China. *Jpn J Infect Dis* 66: 558–60. PMID: [24270153](https://pubmed.ncbi.nlm.nih.gov/24270153/)
7. World Health Organization. (23 February 2015) WHO risk assessment of human infection with avian influenza A (H7N9) virus. Available: [http://www.who.int/influenza/human\\_animal\\_interface/influenza\\_h7n9/Risk\\_Assessment/en/](http://www.who.int/influenza/human_animal_interface/influenza_h7n9/Risk_Assessment/en/). Accessed 2 April 2015.
8. Chen H, Yuan H, Gao R, Zhang J, Wang D, Xiong Y, et al. (2014) Clinical and epidemiological characteristics of a fatal case of avian influenza A H10N8 virus infection: a descriptive study. *Lancet* 383:714–21. doi: [10.1016/S0140-6736\(14\)60111-2](https://doi.org/10.1016/S0140-6736(14)60111-2) PMID: [24507376](https://pubmed.ncbi.nlm.nih.gov/24507376/)
9. Bridges CB, Lim W, Primmer JH, Sims L, Fukuda KJ, Mak KH, et al. (2002) Risk of influenza A (H5N1) infection among poultry workers, Hong Kong, 1997–1998. *J Infect Dis* 185: 1005–10. PMID: [11930308](https://pubmed.ncbi.nlm.nih.gov/11930308/)
10. Kandun IN, Tresnaningsih E, Purba WH, Lee V, Samaan G, Harun S, et al. (2008) Factors associated with case fatality of human H5N1 virus infections in Indonesia: a case series. *Lancet* 372: 744–9. doi: [10.1016/S0140-6736\(08\)61125-3](https://doi.org/10.1016/S0140-6736(08)61125-3) PMID: [18706688](https://pubmed.ncbi.nlm.nih.gov/18706688/)
11. Liu W, Zhu Y, Qi X, Xu K, Ge A, Ji H, et al. (2013) Risk assessment on the epidemics of human infection with a novel avian influenza A (H7N9) virus in Jiangsu Province, China. *J Bio Research* 27(3):163–6.
12. Kung NY, Guan Y, Perkins NR. (2003) The impact of a monthly rest day on avian influenza virus isolation rates in retail live poultry markets in Hong Kong. *Avian Dis* 47 (Suppl 3): s1037–s1041.
13. Jones JH, Salathe M. (2009) Early assessment of anxiety and behavioral response to novel swine-origin influenza A (H1N1). *PLoS ONE* 4:e8032. doi: [10.1371/journal.pone.0008032](https://doi.org/10.1371/journal.pone.0008032) PMID: [19997505](https://pubmed.ncbi.nlm.nih.gov/19997505/)
14. Goodwin R, Haque S, Neto F, Myers LB. (2009) Initial psychological responses to Influenza A, H1N1 (“Swine flu”). *BMC Infect Dis* 9:166. doi: [10.1186/1471-2334-9-166](https://doi.org/10.1186/1471-2334-9-166) PMID: [19807908](https://pubmed.ncbi.nlm.nih.gov/19807908/)
15. Rubin G, Amlot R, Page L, Wessely S. (2009) Public perceptions, anxiety, and behaviour change in relation to the swine flu outbreak: cross sectional telephone survey. *BMJ* 339:b2651. doi: [10.1136/bmj.b2651](https://doi.org/10.1136/bmj.b2651) PMID: [19574308](https://pubmed.ncbi.nlm.nih.gov/19574308/)
16. Dinh PN, Long HT, Tien NT, Hien NT, Mai Le TQ, Phong le H, et al. (2006) Risk Factors for Human Infection with Avian Influenza A H5N1, Vietnam, 2004. *Emerg Infect Dis* 12: 1841–7. PMID: [17326934](https://pubmed.ncbi.nlm.nih.gov/17326934/)
17. Olsen SJ, Laosiritaworn Y, Pattanasin S, Prapasiri P, Dowell SF. (2005) Poultry-handling practices during avian influenza outbreak, Thailand. *Emerg Infect Dis* 11(10):1601–3. PMID: [16318704](https://pubmed.ncbi.nlm.nih.gov/16318704/)

18. Manabe T, Tran TH, Doan ML, Do TH, Pham TP, Dinh TT, et al. (2012) Knowledge, Attitudes, Practices and Emotional Reactions among Residents of Avian Influenza (H5N1) Hit Communities in Vietnam. *PLoS ONE* 7(10): e47560. doi: [10.1371/journal.pone.0047560](https://doi.org/10.1371/journal.pone.0047560) PMID: [23094063](https://pubmed.ncbi.nlm.nih.gov/23094063/)
19. Ortiz JR, Katz MA, Mahmoud MN, Ahmed S, Bawa SI, Famon EC, et al. (2007) Lack of Evidence of Avian-to-Human Transmission of Avian Influenza A (H5N1) Virus among Poultry Workers, Kano, Nigeria, 2006. *J Infect Dis* 196: 1685–91. PMID: [18008254](https://pubmed.ncbi.nlm.nih.gov/18008254/)
20. Grayson ML, Melvani S, Druce J, Barr LG, Ballard SA, Johnson PD, et al. (2009) Efficacy of Soap and Water and Alcohol-Based Hand-Rub Preparations against Live H1N1 Influenza Virus on the Hands of Human Volunteers. *Clin Infect Dis* 48(3):285–91. doi: [10.1086/595845](https://doi.org/10.1086/595845) PMID: [19115974](https://pubmed.ncbi.nlm.nih.gov/19115974/)
21. Abbate R, Giuseppe GD, Marinelli P, Angelillo IF. (2006) Knowledge, Attitudes, and Practices of Avian Influenza, Poultry Workers, Italy. *Emerg Infect Dis* 12: 1762–5. PMID: [17283632](https://pubmed.ncbi.nlm.nih.gov/17283632/)
22. World Health Organization. Influenza vaccines. (2005) *Wkly Epidemiol Rec.* 80:279–87. PMID: [16171031](https://pubmed.ncbi.nlm.nih.gov/16171031/)
23. China National Radio. (22 Jan 2014) This year's flu virus is active and complex, receiving influenza vaccine can prevent flu effectively. Available: [http://china.cnr.cn/news/201401/t20140122\\_514710592.shtml](http://china.cnr.cn/news/201401/t20140122_514710592.shtml). Accessed 20 September 2014.
24. Jia XH. (22 September 2009) The rate of influenza vaccination in Beijing is closed to average level of developed countries. Available: <http://info.pharmacy.hc360.com/2009/09/22083290776.shtml>. Accessed 20 September 2014.
25. Li TG, Feng J, Qing PZ, Fan XM, Liu WS, Li MX, et al. (2014) Attitudes, practices and information needs regarding novel influenza A (H7N9) among employees of food production and operation in Guangzhou, Southern China: a cross-sectional study. *BMC Infect Dis* 14:4. doi: [10.1186/1471-2334-14-4](https://doi.org/10.1186/1471-2334-14-4) PMID: [24383626](https://pubmed.ncbi.nlm.nih.gov/24383626/)
26. Leung YH, Lau EH, Zhang LJ, Guan Y, Cowling BJ, Peiris JS. (2012) Avian influenza and ban on overnight poultry storage in live poultry markets, Hong Kong. *Emerg Infect Dis* 18 (8):1339–41. doi: [10.3201/eid1808.111879](https://doi.org/10.3201/eid1808.111879) PMID: [22840782](https://pubmed.ncbi.nlm.nih.gov/22840782/)
27. Zhang QL, Zhang ZW, Liu YZ, Xia XZ, Liu SW, Li MF, et al. (2008) Survey on knowledge, attitude and behavior about human avian influenza in employees in poultry and non-poultry industry. *Chin J Public Health* 24(11):1370–2.
