# Supplementary material for: Knowledge, Attitudes, and Practices (KAP) Relating to Avian Influenza (H10N8) among Farmers’ Markets Workers in Nanchang, China
Source: PLoS One. 2015 May 18;10(5):e0127120. doi: 10.1371/journal.pone.0127120 (PMC4436285; doi:10.1371/journal.pone.0127120)
Supplement: S1 Dataset — This is the original database that matched by the questionnaire. (XLS) [file pone.0127120.s001.xls]

## Sheet: 3-4南昌市农贸市场KAP调查
ID	Date	Q1	Q2	Q3	Q4	Q5	Q6	Q7	Q8	Q8.1	Q9	Q9.1	Q10	Q11.1	Q11.4	Q11.3	Q11.2	Q12.1	Q12.2	Q12.3	Q12.4	Q12.5	Q12.6	Q13.1	Q13.2	Q13.3	Q13.4	Q13.4.1	Q13.5	Q13.6	Q13.7	Q13.8	Q14	Q15	Q16	Q17	Q18	Q19	Q20	Investigator
DH-B7	2014-01-12	2	#NULL!	1	1	#NULL!	5	2	2	#NULL!	2	#NULL!	2	1	1	1	3	1	1	1	1	3	3	#NULL!	#NULL!	#NULL!	#NULL!	#NULL!	#NULL!	#NULL!	#NULL!	#NULL!	1	#NULL!	#NULL!	1	1	2	2	朱春芳
DH-B8	2014-01-12	2	#NULL!	1	1	2	6	2	#NULL!	#NULL!	2	#NULL!	1	1	1	1	1	1	2	2	3	3	2	#NULL!	#NULL!	#NULL!	#NULL!	#NULL!	#NULL!	#NULL!	#NULL!	#NULL!	1	#NULL!	#NULL!	3	1	2	2	朱春芳
XH-B099	2014-01-12	2	#NULL!	1	2	2	9	1	2	#NULL!	2	#NULL!	#NULL!	#NULL!	#NULL!	#NULL!	#NULL!	#NULL!	#NULL!	#NULL!	#NULL!	#NULL!	#NULL!	#NULL!	#NULL!	#NULL!	#NULL!	#NULL!	#NULL!	#NULL!	#NULL!	#NULL!	#NULL!	#NULL!	#NULL!	#NULL!	#NULL!	#NULL!	2	熊楚妮
XH-B159	2014-01-13	#NULL!	#NULL!	1	4	#NULL!	4	1	2	#NULL!	1	1	1	1	3	1	1	1	3	3	3	3	3	2	2	2	2	#NULL!	1	1	1	1	1	1	1	1	1	2	2	王蓉
DH-B9	2014-01-12	1	#NULL!	1	3	2	6	#NULL!	2	#NULL!	1	2	1	1	1	1	1	1	1	3	1	1	2	2	2	2	2	#NULL!	1	1	1	1	2	2	2	2	1	2	2	朱春芳
XJ-B18	2014-01-14	1	#NULL!	1	3	#NULL!	8	2	2	#NULL!	1	2	2	1	1	1	3	3	3	3	3	3	2	1	2	2	1	1	2	2	1	2	3	2	2	1	3	3	2	陈丽华
XH-B139	2014-01-13	2	#NULL!	1	3	#NULL!	7	1	2	#NULL!	1	4	2	1	1	1	1	1	2	2	2	2	2	2	2	2	2	#NULL!	2	2	2	2	1	1	1	1	1	2	2	熊楚妮
AYX-B24	2014-01-10	1	17	1	3	2	1	2	2	#NULL!	2	#NULL!	3	1	1	1	1	1	1	1	1	1	1	#NULL!	#NULL!	#NULL!	#NULL!	#NULL!	#NULL!	#NULL!	#NULL!	#NULL!	2	#NULL!	#NULL!	1	1	2	2	杨昌林
52	2013-12-29	1	20	1	2	2	9	1	2	#NULL!	2	#NULL!	2	1	3	1	1	1	1	3	1	1	1	#NULL!	#NULL!	#NULL!	#NULL!	#NULL!	#NULL!	#NULL!	#NULL!	#NULL!	2	#NULL!	#NULL!	3	1	4	2	郭双莉
QYP-B3	2014-01-14	2	20	1	5	2	8	2	2	#NULL!	1	1	1	1	1	1	1	1	1	1	1	1	1	2	2	1	1	2	2	2	1	2	3	1	2	1	1	2	2	邓云兰
XJ-B76	2014-01-14	1	20	1	3	2	9	2	2	#NULL!	1	1	1	1	1	1	1	1	1	1	1	1	3	2	2	2	1	2	2	2	1	2	1	2	2	1	1	2	2	涂中兴
18	2013-12-30	2	20	1	5	2	3	1	#NULL!	#NULL!	1	1	1	1	1	1	1	1	1	1	1	1	1	2	2	2	2	#NULL!	1	1	2	1	3	#NULL!	2	1	1	1	2	路亮
QSH-B34	2014-01-14	2	20	#NULL!	4	2	7	3	2	#NULL!	1	4	2	1	1	1	1	1	1	1	1	1	1	2	1	1	1	2	2	2	1	1	2	1	2	1	1	2	2	魏贵英
XH-B140	2014-01-13	1	21	1	3	1	8	1	2	#NULL!	1	1	1	1	1	3	3	1	3	3	3	3	3	2	2	2	2	#NULL!	2	2	1	1	2	1	1	1	1	2	2	王蓉
126	2013-12-29	2	21	1	4	1	8	2	2	#NULL!	1	2	3	1	1	1	1	2	2	3	2	3	3	2	2	2	1	2	2	2	1	2	3	1	2	1	3	2	2	魏贵英
QYP-B87	2014-01-12	2	22	1	3	2	1	1	2	#NULL!	2	#NULL!	1	3	3	3	3	3	3	3	3	3	3	#NULL!	#NULL!	#NULL!	#NULL!	#NULL!	#NULL!	#NULL!	#NULL!	#NULL!	4	#NULL!	#NULL!	3	3	3	2	章文华
QYP-B99	2014-01-13	2	22	1	3	2	8	2	2	#NULL!	1	1	2	1	1	1	1	1	1	1	1	1	1	2	2	1	1	2	1	1	1	1	2	1	1	1	1	2	2	章文华
122	2013-12-30	2	22	1	5	2	3	1	2	#NULL!	1	1	3	1	1	1	1	1	1	1	1	1	1	2	2	2	1	1	2	2	2	2	1	1	2	3	1	1	2	路亮
QYP-B4	2014-01-14	1	23	1	4	2	1	3	2	#NULL!	2	#NULL!	#NULL!	1	1	1	1	1	1	1	1	1	1	#NULL!	#NULL!	#NULL!	#NULL!	#NULL!	#NULL!	#NULL!	#NULL!	#NULL!	2	#NULL!	#NULL!	1	1	1	2	吴海亮
QYP-B26	2014-01-14	1	23	1	5	2	1	2	2	#NULL!	1	1	2	1	1	1	1	1	1	1	1	3	3	2	1	1	1	2	2	2	2	1	2	1	1	1	1	2	2	周军华
XJX-B122	2014-01-14	1	23	1	4	2	9	2	2	#NULL!	1	1	2	1	1	1	1	1	1	1	1	1	3	2	2	2	1	1	2	2	1	2	2	2	2	1	1	2	2	涂中兴
119	2013-12-30	1	23	1	5	1	3	2	2	#NULL!	1	1	1	1	1	1	1	1	1	1	1	1	1	2	1	1	1	2	2	2	1	1	2	1	2	1	1	2	2	彭时辉
XH-B68	2014-01-14	1	23	1	4	1	6	2	2	#NULL!	1	3	2	1	1	1	1	3	1	1	1	3	1	2	1	1	1	1	2	2	1	2	2	1	1	1	1	4	2	叶松
AYX-B17	2014-01-10	2	23	1	5	2	1	1	2	#NULL!	1	3	2	1	1	1	1	1	1	1	1	2	2	2	2	1	1	2	2	2	1	1	3	1	2	1	1	2	2	肖芸
7	2013-12-30	1	23	1	3	2	3	3	2	#NULL!	1	3	1	3	1	1	1	1	1	1	1	1	1	1	1	1	1	2	1	1	1	2	2	1	2	1	1	2	2	路亮
123	2013-12-30	2	23	1	5	2	3	1	#NULL!	#NULL!	1	4	3	1	1	1	1	1	1	1	1	1	1	2	1	1	1	2	2	2	2	1	1	1	2	1	1	1	2	彭时辉
DH-B76	2014-01-14	2	24	1	2	2	5	1	2	#NULL!	1	1	1	1	1	1	1	1	1	1	1	1	1	2	2	1	1	1	2	2	1	2	1	2	1	1	1	1	2	龙强
XJX-B126	2014-01-14	2	24	1	3	2	1	3	2	#NULL!	1	1	2	1	1	1	1	1	1	1	1	2	3	2	2	2	1	1	2	2	2	1	2	1	1	1	1	2	2	涂中兴
DH-B77	2014-01-14	2	24	#NULL!	4	#NULL!	4	1	2	#NULL!	1	2	2	1	1	1	1	1	1	1	1	1	1	2	2	1	1	1	2	2	1	2	1	1	1	1	1	2	2	龙强
XJX-B124	2014-01-14	1	24	1	3	2	1	3	2	#NULL!	1	2	2	1	1	1	1	1	1	1	1	1	3	2	2	2	1	1	2	2	1	2	1	1	1	1	1	2	2	涂中兴
XH-B141	2014-01-13	1	24	1	3	#NULL!	5	2	2	#NULL!	1	3	1	1	1	1	1	2	2	2	2	3	3	2	2	2	2	#NULL!	2	2	2	2	1	1	1	3	3	4	2	熊楚妮
224	2013-12-30	2	25	1	3	1	1	1	2	#NULL!	2	#NULL!	2	2	1	1	1	2	3	3	3	3	2	#NULL!	#NULL!	#NULL!	#NULL!	#NULL!	#NULL!	#NULL!	#NULL!	#NULL!	4	#NULL!	#NULL!	3	3	2	2	彭时辉
XJX-B125	2014-01-14	1	25	1	3	2	1	2	2	#NULL!	1	1	1	1	1	1	1	1	1	1	1	1	3	2	2	2	1	1	2	2	1	2	2	1	2	1	1	2	2	涂中兴
QYP-B86	2014-01-12	1	26	1	3	2	1	3	2	#NULL!	2	#NULL!	1	3	3	1	1	1	2	2	2	2	2	#NULL!	#NULL!	#NULL!	#NULL!	#NULL!	#NULL!	#NULL!	#NULL!	#NULL!	4	#NULL!	#NULL!	3	3	3	2	章文华
AYX-B19	2014-01-10	1	26	1	5	1	1	2	2	#NULL!	2	#NULL!	2	1	1	1	1	1	1	1	1	1	1	#NULL!	#NULL!	#NULL!	#NULL!	#NULL!	#NULL!	#NULL!	#NULL!	#NULL!	1	#NULL!	#NULL!	1	1	2	2	杨昌林
312	2013-12-31	2	26	1	3	2	6	2	2	#NULL!	1	1	1	1	1	1	1	1	1	1	1	1	2	1	1	1	1	1	1	1	1	1	1	1	1	1	1	1	2	杨昌林
227	2013-12-30	2	26	1	5	2	3	1	2	#NULL!	1	2	2	1	1	1	1	1	1	3	1	2	3	1	2	2	1	1	2	2	2	1	2	1	2	1	1	2	2	杨昌林
XH-B087	2014-01-12	1	26	1	3	2	4	1	2	#NULL!	1	3	1	1	1	1	1	1	1	1	2	1	1	2	1	1	1	1	1	1	1	1	3	1	1	1	1	1	2	叶松
XJ-B25	2014-01-14	1	26	1	3	#NULL!	1	3	2	#NULL!	1	3	1	1	1	1	3	3	3	3	3	2	2	1	2	2	1	1	2	2	1	2	2	2	2	1	3	3	2	陈丽华
221	2013-12-30	2	26	1	3	2	1	1	2	#NULL!	1	3	1	1	1	1	1	1	1	1	1	1	2	1	2	1	1	2	1	2	1	2	4	3	3	1	1	2	2	杨昌林
QYP-B68	2014-01-17	1	27	1	4	2	1	3	3	#NULL!	2	#NULL!	2	1	1	1	1	1	1	1	1	1	1	#NULL!	#NULL!	#NULL!	#NULL!	#NULL!	#NULL!	#NULL!	#NULL!	#NULL!	1	#NULL!	#NULL!	1	1	1	2	吴海亮
WL-B36	2014-01-14	2	27	1	3	2	1	1	2	#NULL!	1	1	3	1	1	1	2	1	3	3	3	2	2	2	2	2	2	#NULL!	2	2	1	2	3	1	1	1	1	2	2	饶裕莲
XJ-B27	2014-01-14	2	27	1	2	2	1	3	2	#NULL!	1	1	1	1	1	1	3	3	3	3	3	3	2	1	2	2	1	1	2	2	1	2	2	2	2	1	3	3	2	陈丽华
218	2013-12-30	1	27	1	5	1	1	3	2	#NULL!	1	1	2	1	1	1	1	1	2	2	2	3	3	#NULL!	#NULL!	#NULL!	#NULL!	#NULL!	#NULL!	#NULL!	#NULL!	#NULL!	#NULL!	#NULL!	#NULL!	#NULL!	#NULL!	#NULL!	2	杨昌林
15	2013-12-30	2	27	1	4	2	6	1	#NULL!	#NULL!	1	1	1	1	1	1	1	1	1	1	1	1	1	1	1	1	1	2	1	1	1	1	3	1	1	1	1	1	2	路亮
XH-B79	2014-01-14	2	27	1	4	2	6	3	2	#NULL!	1	2	1	1	1	1	1	1	1	1	2	2	1	2	2	1	1	1	2	2	1	2	1	1	4	1	1	2	2	叶松
AYX-B23	2014-01-10	2	28	1	3	2	1	1	2	#NULL!	2	#NULL!	1	3	3	1	3	1	3	3	3	3	3	#NULL!	#NULL!	#NULL!	#NULL!	#NULL!	#NULL!	#NULL!	#NULL!	#NULL!	3	#NULL!	#NULL!	1	1	4	2	李才火
AYX-B29	2014-01-10	2	28	1	4	2	6	3	2	#NULL!	2	#NULL!	3	1	1	1	1	1	1	1	1	1	1	#NULL!	#NULL!	#NULL!	#NULL!	#NULL!	#NULL!	#NULL!	#NULL!	#NULL!	2	#NULL!	#NULL!	1	1	2	2	杨昌林
XJX-B097	2014-01-14	2	28	1	3	2	9	2	2	#NULL!	1	1	2	1	1	1	1	1	1	1	1	1	2	2	2	2	1	1	2	2	1	2	1	2	2	1	1	1	2	涂中兴
AYX-B20	2014-01-10	1	28	1	3	2	1	1	2	#NULL!	1	1	2	1	1	1	1	1	1	1	1	3	3	2	2	1	1	2	2	2	2	2	3	1	1	1	1	4	2	李才火
XH-B113	2014-01-12	1	28	1	3	2	5	3	2	#NULL!	1	2	2	1	1	1	1	1	1	1	1	1	2	1	1	1	1	2	1	2	1	2	3	1	1	1	1	2	2	胡玉城
XJ-B52	2014-01-14	1	28	1	4	2	9	2	2	#NULL!	1	2	2	1	1	1	1	3	3	3	3	2	2	1	1	2	1	1	2	1	2	2	2	2	2	1	3	2	2	陈丽华
XJX-B096	2014-01-14	2	28	1	3	1	5	2	2	#NULL!	1	2	2	1	1	1	1	1	1	1	1	1	3	2	2	2	1	1	2	2	1	2	3	1	1	1	1	2	2	涂中兴
116	2013-12-30	1	28	1	5	2	1	1	2	#NULL!	1	2	1	1	1	2	1	1	1	1	1	1	3	2	2	2	2	#NULL!	1	2	1	1	4	2	1	1	1	2	2	郭双莉
125	2013-12-30	2	28	1	4	1	3	2	2	#NULL!	1	2	3	1	1	3	3	1	3	3	3	3	3	2	2	2	1	1	2	2	1	2	3	1	2	1	1	2	2	魏贵英
XJX-B121	2014-01-14	2	28	#NULL!	#NULL!	#NULL!	8	#NULL!	2	#NULL!	1	3	2	1	1	1	1	1	1	1	1	1	3	2	2	2	1	1	2	2	1	2	3	1	1	1	1	2	2	涂中兴
WL-B11	2014-01-14	2	29	1	3	1	1	1	2	#NULL!	2	#NULL!	2	1	1	3	1	1	1	3	3	1	3	#NULL!	#NULL!	#NULL!	#NULL!	#NULL!	#NULL!	#NULL!	#NULL!	#NULL!	2	#NULL!	#NULL!	3	1	2	2	肖超广
HGT-B14	2014-01-14	1	29	1	5	2	9	2	2	#NULL!	2	#NULL!	1	1	1	1	1	1	1	1	1	1	1	#NULL!	#NULL!	#NULL!	#NULL!	#NULL!	#NULL!	#NULL!	#NULL!	#NULL!	2	#NULL!	#NULL!	1	1	1	2	戚京城
AYX-B15	2014-01-10	2	29	1	3	1	1	2	2	#NULL!	2	#NULL!	2	1	1	1	1	1	1	1	1	1	1	#NULL!	#NULL!	#NULL!	#NULL!	#NULL!	#NULL!	#NULL!	#NULL!	#NULL!	2	#NULL!	#NULL!	1	1	2	2	杨昌林
XJ-B43	2014-01-14	2	29	1	3	2	1	#NULL!	2	#NULL!	1	2	2	1	1	1	1	1	1	1	1	1	3	2	2	2	1	1	2	2	1	2	1	2	2	1	1	2	2	陈丽华
XJX-B110	2014-01-14	2	29	1	4	2	9	2	2	#NULL!	1	2	2	1	1	1	1	1	1	1	1	1	3	2	2	2	1	2	2	2	1	2	1	1	2	1	1	2	2	涂中兴
XJX-B135	2014-01-14	2	29	1	3	2	8	2	2	#NULL!	1	2	2	1	1	1	1	1	1	1	1	1	2	2	2	2	1	2	2	2	1	2	1	1	2	1	1	2	2	涂中兴
WL-B5	2014-01-14	1	30	1	3	2	1	2	1	2	2	#NULL!	2	1	3	1	3	1	3	1	1	2	2	#NULL!	#NULL!	#NULL!	#NULL!	#NULL!	#NULL!	#NULL!	#NULL!	#NULL!	2	#NULL!	#NULL!	3	3	2	1	饶裕莲
XJ-B73	2014-01-14	1	30	1	3	2	7	2	2	#NULL!	2	#NULL!	#NULL!	#NULL!	#NULL!	#NULL!	#NULL!	#NULL!	#NULL!	#NULL!	#NULL!	#NULL!	#NULL!	#NULL!	#NULL!	#NULL!	#NULL!	#NULL!	#NULL!	#NULL!	#NULL!	#NULL!	#NULL!	#NULL!	#NULL!	#NULL!	#NULL!	#NULL!	2	谢玉兰
110	2013-12-29	1	30	1	4	1	1	3	1	1	2	#NULL!	1	1	1	1	1	1	1	1	1	2	1	#NULL!	#NULL!	#NULL!	#NULL!	#NULL!	#NULL!	#NULL!	#NULL!	#NULL!	3	#NULL!	#NULL!	1	1	2	2	彭时辉
4	2013-12-30	1	30	1	2	1	7	2	2	#NULL!	2	#NULL!	1	1	1	1	2	2	1	1	2	3	3	#NULL!	#NULL!	#NULL!	#NULL!	#NULL!	#NULL!	#NULL!	#NULL!	#NULL!	2	#NULL!	#NULL!	1	1	2	2	郭双莉
XH-B48	2014-01-14	#NULL!	30	1	3	2	7	1	2	#NULL!	1	1	1	3	1	1	1	1	1	1	1	3	3	#NULL!	#NULL!	#NULL!	#NULL!	#NULL!	#NULL!	#NULL!	#NULL!	#NULL!	#NULL!	#NULL!	#NULL!	#NULL!	#NULL!	#NULL!	2	兰彪
XHQ-B184	2014-01-13	1	30	1	3	2	1	2	2	#NULL!	1	1	1	1	1	1	1	1	1	1	1	3	2	2	2	2	2	#NULL!	2	2	1	2	1	1	1	1	1	2	2	兰彪
QYP-B61	2014-01-16	2	30	1	2	2	8	2	2	#NULL!	1	1	2	1	2	1	1	1	2	2	2	2	2	2	2	1	1	2	2	2	1	1	2	1	2	1	1	2	2	周军华
XJX-B087	2014-01-14	1	30	1	3	2	4	2	2	#NULL!	1	1	1	3	1	1	1	1	1	1	1	1	3	2	2	2	1	2	2	2	1	2	1	1	1	1	1	2	2	谢玉庆
5	2013-12-30	1	30	1	3	1	9	2	2	#NULL!	1	1	2	1	1	1	1	1	1	1	1	1	1	2	2	2	2	#NULL!	1	1	1	2	2	1	1	1	1	2	2	郭双莉
207	2013-12-30	1	30	1	4	2	1	3	2	#NULL!	1	1	2	2	1	1	2	3	3	3	3	3	3	1	2	1	2	#NULL!	1	2	1	2	2	1	1	1	1	2	2	彭时辉
AYX-B21	2014-01-10	2	30	1	3	2	1	1	2	#NULL!	1	2	2	3	1	1	3	1	3	3	3	3	3	2	2	1	1	2	2	2	2	2	3	1	2	1	1	1	2	李才火
AYX-B22	2014-01-10	1	30	1	3	2	1	2	2	#NULL!	1	2	2	3	1	1	1	1	1	1	1	3	2	2	2	1	1	2	2	2	2	1	3	1	1	1	1	4	2	李才火
AYX-B37	2014-01-10	2	30	2	3	2	1	2	2	#NULL!	1	2	3	1	1	1	1	1	1	1	1	1	1	2	2	1	1	2	2	2	1	1	4	1	2	1	1	4	2	李才火
XJX-B127	2014-01-14	1	30	1	3	2	1	2	2	#NULL!	1	4	1	1	1	1	1	1	1	1	1	2	1	2	2	2	1	#NULL!	2	2	2	2	2	1	1	1	1	1	2	涂中兴
XH-B27	2014-01-14	2	31	1	3	2	1	1	2	#NULL!	2	#NULL!	1	1	1	1	1	1	3	1	1	1	3	#NULL!	#NULL!	#NULL!	#NULL!	#NULL!	#NULL!	#NULL!	#NULL!	#NULL!	4	#NULL!	#NULL!	1	1	4	2	叶松
225	2013-12-30	1	31	1	3	2	1	2	2	#NULL!	2	#NULL!	1	3	3	3	3	3	3	3	3	3	3	#NULL!	#NULL!	#NULL!	#NULL!	#NULL!	#NULL!	#NULL!	#NULL!	#NULL!	2	#NULL!	#NULL!	3	3	2	2	杨昌林
302	2013-12-31	1	31	1	3	2	6	2	2	#NULL!	2	#NULL!	3	1	1	1	1	1	1	1	1	2	1	#NULL!	#NULL!	#NULL!	#NULL!	#NULL!	#NULL!	#NULL!	#NULL!	#NULL!	2	#NULL!	#NULL!	1	1	1	2	杨昌林
QYP-B81	2014-01-12	2	31	1	4	2	1	1	2	#NULL!	1	1	2	2	1	1	1	1	1	1	1	1	1	1	1	1	1	2	1	1	1	1	2	1	1	1	1	2	2	章文华
XJ-B35	2014-01-14	1	31	1	4	2	1	2	#NULL!	#NULL!	1	1	2	1	1	1	1	3	3	3	3	2	2	1	2	2	1	1	2	2	1	1	3	2	2	1	3	3	2	凌荣明
72	2013-12-30	1	31	1	3	1	3	2	2	#NULL!	1	1	1	1	1	1	1	1	3	3	3	3	2	1	1	1	1	2	1	1	1	1	1	1	3	1	1	1	2	郭双莉
XJX-B115	2014-01-14	2	31	1	2	2	8	2	2	#NULL!	1	2	2	1	1	1	1	1	1	1	1	1	2	2	2	2	1	1	2	2	1	2	1	1	2	1	1	2	2	涂中兴
XJX-B132	2014-01-14	1	31	1	3	1	1	3	2	#NULL!	1	2	1	1	1	1	1	1	1	1	1	1	1	2	2	2	1	#NULL!	2	2	2	2	1	1	1	2	2	2	2	涂中兴
XJX-B134	2014-01-14	2	32	1	3	2	1	3	2	#NULL!	1	2	1	1	1	1	1	1	1	1	1	2	3	2	2	2	2	#NULL!	2	2	2	2	3	1	1	1	1	2	2	涂中兴
XJ-B72	2014-01-14	1	32	1	3	2	8	1	2	#NULL!	1	3	1	1	1	1	1	3	2	3	3	3	3	1	1	1	1	1	2	2	1	2	3	1	1	1	3	3	2	涂中兴
XJX-B128	2014-01-14	2	32	1	#NULL!	2	1	3	2	#NULL!	1	4	1	1	1	1	1	1	1	1	1	2	2	2	2	2	1	1	2	2	2	2	2	1	2	1	2	2	2	涂中兴
DH-B78	2014-01-14	2	33	1	4	2	8	1	2	#NULL!	2	#NULL!	2	1	1	1	1	1	1	1	1	2	1	#NULL!	#NULL!	#NULL!	#NULL!	#NULL!	#NULL!	#NULL!	#NULL!	#NULL!	1	#NULL!	#NULL!	1	1	2	2	龙强
314	2013-12-31	2	33	1	2	2	8	2	2	#NULL!	2	#NULL!	2	1	1	1	1	2	3	1	1	2	2	#NULL!	#NULL!	#NULL!	#NULL!	#NULL!	#NULL!	#NULL!	#NULL!	#NULL!	1	#NULL!	#NULL!	1	1	4	2	王斌
408	2013-12-31	1	33	1	3	2	8	2	#NULL!	#NULL!	2	#NULL!	1	1	1	1	1	1	3	3	3	2	2	#NULL!	#NULL!	#NULL!	#NULL!	#NULL!	#NULL!	#NULL!	#NULL!	#NULL!	1	#NULL!	#NULL!	1	1	2	2	王斌
XJ-B68	2014-01-14	2	33	1	2	2	8	1	2	#NULL!	1	1	2	1	1	1	1	3	2	2	2	3	3	1	1	1	2	#NULL!	2	2	1	2	1	2	1	1	3	3	2	谢玉庆
XJX-B120	2014-01-14	2	33	1	3	2	8	2	2	#NULL!	1	1	2	1	1	1	1	1	1	1	1	1	3	2	2	2	1	1	2	2	1	2	2	1	2	1	1	2	2	涂中兴
AYX-B33	2014-01-10	2	33	1	3	2	6	1	2	#NULL!	1	1	2	1	1	1	1	1	1	1	1	1	2	2	2	2	2	#NULL!	2	2	1	1	3	1	2	1	1	2	2	肖芸
XJX-B082	2014-01-14	2	33	1	3	2	7	2	2	#NULL!	1	2	1	1	1	1	1	1	1	1	1	1	3	2	2	2	1	2	2	2	1	2	1	1	2	1	1	2	2	涂中兴
8	2014-01-14	1	33	1	5	2	1	2	3	#NULL!	1	3	1	3	1	1	1	1	2	2	1	2	3	2	2	1	1	2	1	1	2	2	2	2	3	1	1	2	2	郭双莉
QYP-B9	2014-01-14	2	34	1	2	2	4	1	2	#NULL!	2	#NULL!	3	1	1	1	1	1	1	1	1	1	1	#NULL!	#NULL!	#NULL!	#NULL!	#NULL!	#NULL!	#NULL!	#NULL!	#NULL!	3	#NULL!	#NULL!	1	1	1	2	吴海亮
AYX-B34	2014-01-10	1	34	1	1	2	1	2	2	#NULL!	2	#NULL!	3	1	1	1	1	1	1	1	1	1	2	#NULL!	#NULL!	#NULL!	#NULL!	#NULL!	#NULL!	#NULL!	#NULL!	#NULL!	2	#NULL!	#NULL!	1	1	2	1	杨昌林
XJX-B088	2014-01-14	1	34	1	3	2	8	3	2	#NULL!	1	1	2	1	1	1	1	1	1	1	1	1	3	2	2	2	1	2	2	2	1	2	2	2	2	1	1	2	2	谢玉庆
DH-B37	2014-01-14	2	34	1	3	2	8	2	#NULL!	#NULL!	1	2	2	1	1	1	1	1	1	1	1	3	2	2	2	2	1	1	2	2	2	2	1	1	2	1	1	2	2	朱春芳
XJX-B114	2014-01-14	2	34	1	4	2	8	2	2	#NULL!	1	2	2	1	1	1	1	1	1	1	1	1	3	2	2	2	1	1	2	2	1	2	1	1	2	1	1	2	2	涂中兴
HGT-B05	2014-01-14	2	34	1	2	2	1	2	2	#NULL!	1	3	1	2	1	1	1	1	2	2	2	1	2	2	1	1	1	1	2	2	1	2	2	2	2	1	1	2	2	戚京城
54	2013-12-30	1	34	1	3	2	1	3	2	#NULL!	1	4	1	2	1	1	1	1	2	2	2	2	2	1	2	1	1	1	1	1	1	1	2	2	1	1	1	4	2	郭双莉
DH-B58	2014-01-14	2	35	1	2	2	4	1	2	#NULL!	2	#NULL!	1	1	1	1	1	1	1	1	1	2	3	#NULL!	#NULL!	#NULL!	#NULL!	#NULL!	#NULL!	#NULL!	#NULL!	#NULL!	1	#NULL!	#NULL!	1	1	2	2	龙强
DH-B083	2014-01-14	1	35	1	3	2	4	1	2	#NULL!	2	#NULL!	1	1	1	1	1	1	1	1	1	1	3	#NULL!	#NULL!	#NULL!	#NULL!	#NULL!	#NULL!	#NULL!	#NULL!	#NULL!	4	#NULL!	#NULL!	1	1	2	2	龙强
QYP-B62	2014-01-16	2	35	1	3	2	8	2	2	#NULL!	2	#NULL!	1	3	3	1	1	1	2	2	2	2	2	#NULL!	#NULL!	#NULL!	#NULL!	#NULL!	#NULL!	#NULL!	#NULL!	#NULL!	1	#NULL!	#NULL!	1	3	2	2	周军华
AYX-B40	2014-01-13	2	35	1	3	2	1	2	2	#NULL!	2	#NULL!	2	1	1	1	1	1	1	1	1	1	1	#NULL!	#NULL!	#NULL!	#NULL!	#NULL!	#NULL!	#NULL!	#NULL!	#NULL!	2	#NULL!	#NULL!	1	1	2	2	杨昌林
XH-B11	2014-01-14	1	35	1	3	2	1	1	2	#NULL!	1	1	1	3	1	3	1	1	3	3	3	3	3	2	2	1	2	#NULL!	2	2	1	2	1	1	1	1	1	2	2	叶松
XH-B20	2014-01-14	2	35	1	3	2	1	2	2	#NULL!	1	1	2	1	1	1	1	1	1	1	1	2	1	2	1	1	1	1	2	1	1	1	1	1	1	1	1	1	2	叶松
XH-B129	2014-01-12	2	35	1	2	2	4	1	2	#NULL!	1	1	1	1	1	1	1	1	1	1	1	3	2	2	2	2	2	#NULL!	2	2	2	2	2	1	1	1	1	2	2	兰彪
QSH-B35	2014-01-14	2	35	#NULL!	3	2	7	1	2	#NULL!	1	1	2	1	1	1	1	3	3	3	3	3	2	1	1	1	1	2	2	1	1	1	1	1	2	1	1	2	2	李洪玲
QYP-B50	2014-01-15	2	35	1	3	2	8	1	2	#NULL!	1	1	1	1	1	1	1	1	1	1	1	2	1	2	2	1	1	1	2	2	2	2	2	2	2	1	1	2	2	李洪玲
QYP-B83	2014-01-12	1	35	1	3	2	1	2	2	#NULL!	1	1	2	2	1	1	1	1	1	1	1	1	3	1	1	1	1	2	1	1	1	1	2	1	1	1	1	2	2	章文华
XJ-B61	2014-01-14	2	35	1	3	2	7	1	2	#NULL!	1	1	2	1	1	1	1	3	3	3	3	2	3	1	1	1	2	#NULL!	2	2	1	2	2	2	2	1	3	3	2	涂中兴
XJX-B107	2014-01-14	2	35	1	2	2	4	2	2	#NULL!	1	1	2	1	1	1	1	1	1	1	1	1	3	2	2	2	1	1	2	2	1	2	1	1	2	1	1	2	2	涂中兴
108	2013-12-30	1	35	1	3	2	1	2	2	#NULL!	1	1	1	1	1	1	1	1	2	2	2	2	2	1	1	1	1	2	1	1	1	1	3	1	1	1	1	2	2	郭双莉
DH-B43	2014-01-14	2	35	1	2	2	5	1	2	#NULL!	1	2	2	1	1	1	1	1	1	1	1	1	3	2	2	1	1	1	2	2	1	2	1	1	2	1	1	2	2	朱春芳
QYP-B95	2014-01-13	2	35	1	3	2	4	2	2	#NULL!	1	2	1	1	1	1	1	1	1	3	3	2	2	2	1	1	1	2	2	2	2	1	2	1	1	1	1	2	2	章文华
XJX-B137	2014-01-14	1	35	1	3	#NULL!	1	2	2	#NULL!	1	2	1	1	1	1	1	1	1	1	1	1	3	2	2	2	1	1	2	2	1	2	1	1	2	1	1	2	2	涂中兴
124	2013-12-30	1	35	1	3	2	3	1	#NULL!	#NULL!	1	3	3	1	1	1	1	1	1	1	1	1	1	2	1	1	1	2	2	2	2	1	1	1	1	1	1	1	2	彭时辉
16	2013-12-30	2	35	1	1	2	1	#NULL!	2	#NULL!	1	3	1	1	1	1	1	1	2	2	1	2	2	2	2	2	2	#NULL!	1	2	1	1	1	1	1	1	1	2	2	郭双莉
414	2013-12-31	1	35	1	4	2	5	2	2	#NULL!	1	3	1	1	1	2	1	1	1	1	1	1	2	2	2	2	2	#NULL!	2	2	2	2	4	1	2	1	1	2	2	王斌
XH-B47	2014-01-14	2	35	1	3	#NULL!	4	1	2	#NULL!	1	4	1	3	1	3	3	3	3	3	3	3	3	2	2	1	2	#NULL!	2	2	1	2	2	1	1	1	1	4	2	叶松
QSH-B30	2014-01-14	1	35	#NULL!	1	2	6	1	2	#NULL!	1	4	1	1	1	1	3	1	1	1	1	3	3	2	2	2	2	#NULL!	2	2	1	2	4	1	1	1	1	2	2	蔡丹桃
QSH-B22	2014-01-13	2	36	#NULL!	1	2	8	1	2	#NULL!	2	#NULL!	1	1	1	1	1	1	3	1	1	3	2	#NULL!	#NULL!	#NULL!	#NULL!	#NULL!	#NULL!	#NULL!	#NULL!	#NULL!	4	#NULL!	#NULL!	1	1	1	2	蔡丹桃
QYP-B11	2014-01-14	1	36	1	4	2	5	3	2	#NULL!	2	#NULL!	2	1	1	1	1	1	1	1	1	1	1	#NULL!	#NULL!	#NULL!	#NULL!	#NULL!	#NULL!	#NULL!	#NULL!	#NULL!	1	#NULL!	#NULL!	1	1	4	2	吴海亮
QYP-B15	2014-01-14	2	36	1	4	2	5	3	2	#NULL!	2	#NULL!	1	1	1	1	1	1	1	1	1	3	2	#NULL!	#NULL!	#NULL!	#NULL!	#NULL!	#NULL!	#NULL!	#NULL!	#NULL!	1	#NULL!	#NULL!	1	3	4	2	吴海亮
QYP-B17	2014-01-14	2	36	1	1	2	5	2	2	#NULL!	2	#NULL!	1	1	1	1	1	1	1	2	2	2	2	#NULL!	#NULL!	#NULL!	#NULL!	#NULL!	#NULL!	#NULL!	#NULL!	#NULL!	2	#NULL!	#NULL!	1	3	2	2	邓云兰
WL-B2	2014-01-14	1	36	1	2	2	10	1	2	#NULL!	2	#NULL!	2	3	3	3	3	1	3	3	3	3	2	#NULL!	#NULL!	#NULL!	#NULL!	#NULL!	#NULL!	#NULL!	#NULL!	#NULL!	2	#NULL!	#NULL!	1	3	2	2	饶裕莲
HGT-B21	2014-01-14	1	36	1	3	2	9	2	2	#NULL!	2	#NULL!	1	3	1	1	1	1	3	3	3	2	2	#NULL!	#NULL!	#NULL!	#NULL!	#NULL!	#NULL!	#NULL!	#NULL!	#NULL!	2	#NULL!	#NULL!	1	1	2	2	戚京城
AYX-B49	2014-01-10	1	36	1	2	2	1	2	2	#NULL!	2	#NULL!	2	3	3	3	3	1	3	3	3	3	3	#NULL!	#NULL!	#NULL!	#NULL!	#NULL!	#NULL!	#NULL!	#NULL!	#NULL!	2	#NULL!	#NULL!	3	1	4	2	李才火
311	2013-12-31	2	36	1	2	2	6	2	2	#NULL!	2	#NULL!	1	1	1	1	1	1	3	3	3	3	3	#NULL!	#NULL!	#NULL!	#NULL!	#NULL!	#NULL!	#NULL!	#NULL!	#NULL!	2	#NULL!	#NULL!	1	1	1	2	王斌
DH-B101	2014-01-14	1	36	1	3	2	4	1	2	#NULL!	1	1	1	1	1	1	2	1	2	2	2	2	2	2	2	2	2	#NULL!	2	1	2	2	2	2	1	1	2	2	2	郭艳萍
DH-B108	2014-01-14	1	36	1	2	2	5	1	2	#NULL!	1	1	1	1	1	1	1	1	2	2	2	2	2	2	2	1	2	#NULL!	2	2	2	2	3	1	1	1	1	2	2	郭艳萍
XH-B15	2014-01-14	2	36	1	3	2	1	2	1	1	1	1	1	1	1	1	1	1	1	1	1	1	1	1	1	1	1	2	1	1	1	1	1	1	1	1	1	2	2	叶松
XH-B086	2014-01-13	2	36	1	3	2	1	1	2	#NULL!	1	1	1	3	1	1	1	1	1	1	1	3	3	1	1	1	1	1	1	2	1	2	1	1	1	1	1	1	2	叶松
QSH-B49	2014-01-14	1	36	1	3	2	9	1	2	#NULL!	1	1	3	1	1	1	1	1	1	1	1	1	1	1	1	2	1	1	1	1	1	1	3	1	2	1	1	1	2	郭金
73	2013-12-29	2	36	1	2	2	1	1	1	1	1	1	2	1	1	1	1	1	2	2	3	2	2	1	2	1	1	1	2	2	1	1	2	1	1	3	1	2	2	郭双莉
208	2013-12-30	1	36	1	3	2	1	2	2	#NULL!	1	1	1	1	1	1	1	1	3	3	3	3	3	1	2	1	2	#NULL!	1	2	1	2	2	1	4	1	1	2	2	彭时辉
405	2013-12-31	2	36	1	5	2	9	#NULL!	2	#NULL!	1	1	2	1	1	1	1	1	1	1	1	3	2	1	1	1	1	2	1	1	1	1	3	1	1	1	1	2	2	王斌
XH-B72	2014-01-14	2	36	1	3	2	1	#NULL!	2	#NULL!	1	2	1	1	1	1	1	1	1	1	1	2	1	2	2	1	1	1	2	2	1	2	1	1	1	1	1	4	2	叶松
QYP-B2	2014-01-14	2	36	1	2	2	8	3	2	#NULL!	1	2	1	1	1	1	1	1	1	1	1	1	2	2	2	1	1	2	2	2	2	2	2	2	2	1	1	2	2	邓云兰
117	2013-12-30	2	36	1	4	2	3	3	2	#NULL!	1	2	1	1	1	3	1	1	1	1	1	1	1	2	1	1	1	1	2	2	2	2	1	2	2	1	1	1	2	彭时辉
DH-B80	2014-01-14	1	37	1	3	2	1	1	2	#NULL!	2	#NULL!	2	1	1	1	1	1	1	1	1	1	2	#NULL!	#NULL!	#NULL!	#NULL!	#NULL!	#NULL!	#NULL!	#NULL!	#NULL!	1	#NULL!	#NULL!	1	1	2	2	龙强
DH-B139	2014-01-14	2	37	1	1	2	8	1	2	#NULL!	2	#NULL!	2	1	1	1	1	1	1	1	1	1	3	#NULL!	#NULL!	#NULL!	#NULL!	#NULL!	#NULL!	#NULL!	#NULL!	#NULL!	1	#NULL!	#NULL!	1	1	2	2	郭艳萍
QSH-B24	2014-01-13	2	37	#NULL!	4	1	6	2	2	#NULL!	2	#NULL!	1	1	1	1	1	1	1	1	1	3	1	#NULL!	#NULL!	#NULL!	#NULL!	#NULL!	#NULL!	#NULL!	#NULL!	#NULL!	1	#NULL!	#NULL!	1	1	2	2	蔡丹桃
WL-B31	2014-01-14	1	37	1	2	2	1	3	2	#NULL!	2	#NULL!	1	1	3	3	3	1	3	3	3	3	2	#NULL!	#NULL!	#NULL!	#NULL!	#NULL!	#NULL!	#NULL!	#NULL!	#NULL!	4	#NULL!	#NULL!	1	3	2	2	饶裕莲
HGT-B02	2014-01-14	2	37	1	1	2	1	3	2	#NULL!	2	#NULL!	3	1	1	1	1	1	2	2	2	2	2	#NULL!	#NULL!	#NULL!	#NULL!	#NULL!	#NULL!	#NULL!	#NULL!	#NULL!	2	#NULL!	#NULL!	1	1	1	2	戚京城
AYX-B50	2014-01-10	2	37	1	2	2	1	3	2	#NULL!	2	#NULL!	2	3	3	1	3	3	3	3	3	3	3	#NULL!	#NULL!	#NULL!	#NULL!	#NULL!	#NULL!	#NULL!	#NULL!	#NULL!	3	#NULL!	#NULL!	3	1	4	2	李才火
104	2013-12-30	1	37	1	3	2	1	3	2	#NULL!	2	#NULL!	1	2	1	1	1	2	2	2	1	2	2	#NULL!	#NULL!	#NULL!	#NULL!	#NULL!	#NULL!	#NULL!	#NULL!	#NULL!	3	#NULL!	#NULL!	1	1	2	2	郭双莉
6	2013-12-29	1	37	1	3	2	1	2	1	2	2	#NULL!	1	2	1	1	1	2	2	2	2	2	2	#NULL!	#NULL!	#NULL!	#NULL!	#NULL!	#NULL!	#NULL!	#NULL!	#NULL!	2	#NULL!	#NULL!	1	1	4	2	郭双莉
321	2013-12-31	2	37	#NULL!	#NULL!	2	9	#NULL!	#NULL!	#NULL!	2	#NULL!	1	1	1	1	1	2	2	2	2	2	2	#NULL!	#NULL!	#NULL!	#NULL!	#NULL!	#NULL!	#NULL!	#NULL!	#NULL!	1	#NULL!	#NULL!	1	1	4	2	王斌
XH-B104	2014-01-12	2	37	1	3	2	1	2	2	#NULL!	1	1	1	3	3	3	3	3	3	3	3	3	3	1	2	1	1	2	2	2	1	2	2	1	#NULL!	1	1	2	2	王蓉
XH-B115	2014-01-12	1	37	1	3	2	1	2	2	#NULL!	1	1	1	1	1	1	3	1	1	1	1	2	2	2	2	1	2	#NULL!	2	2	2	2	3	1	1	1	1	2	2	胡玉城
QSH-B40	2014-01-14	2	37	#NULL!	2	1	9	1	2	#NULL!	1	1	1	1	3	1	1	1	1	1	1	2	1	2	1	1	1	2	1	1	1	1	2	1	1	1	1	1	2	蔡丹桃
HGT-B07	2014-01-14	2	37	1	4	2	1	1	2	#NULL!	1	1	1	1	1	1	1	3	3	3	3	3	3	1	1	1	1	1	1	1	1	1	3	1	2	1	1	2	2	戚京城
XJ-B12	2014-01-14	1	37	1	5	2	9	#NULL!	2	#NULL!	1	1	#NULL!	1	1	1	1	1	1	1	1	1	1	2	2	2	1	1	2	2	1	2	1	1	2	1	1	2	2	凌荣明
XJ-B80	2014-01-14	2	37	1	3	2	4	2	2	#NULL!	1	1	1	1	1	1	1	1	1	1	1	1	3	2	2	2	1	1	2	2	1	2	4	1	2	1	1	2	2	谢玉庆
XJX-B133	2014-01-14	2	37	1	3	2	8	2	2	#NULL!	1	1	1	1	1	1	1	1	1	1	1	2	1	2	2	2	1	1	2	2	2	2	1	1	1	1	1	1	2	涂中兴
AYX-B32	2014-01-10	2	37	1	2	2	6	1	2	#NULL!	1	1	2	1	1	2	1	1	1	1	1	2	2	2	2	1	1	2	2	2	1	1	3	1	2	1	1	2	2	肖芸
105	2013-12-29	1	37	1	3	2	1	4	1	1	1	1	1	2	1	2	1	1	2	2	1	2	2	2	2	1	1	1	2	2	1	1	2	1	1	1	1	1	2	彭时辉
107	2013-12-29	1	37	1	3	#NULL!	1	3	2	#NULL!	1	1	3	1	3	1	1	1	3	3	3	3	3	2	2	1	1	2	2	2	1	1	3	1	1	1	1	4	2	彭时辉
203	2013-12-30	1	37	1	2	2	1	2	2	#NULL!	1	1	1	2	1	1	1	1	2	2	1	2	2	2	2	1	1	1	2	1	1	2	3	1	1	1	1	2	2	彭时辉
XJ-B79	2014-01-14	2	37	1	2	2	9	1	2	#NULL!	1	2	2	1	1	1	1	1	1	1	1	1	3	2	2	2	1	1	2	2	1	2	4	1	2	1	1	2	2	陈丽华
XH-B02	2014-01-14	2	37	1	2	2	2	2	1	1	1	4	2	3	3	1	1	3	3	3	3	3	3	2	2	1	1	1	1	2	1	2	2	1	1	1	1	1	2	叶松
DH-B084	2014-01-14	2	38	1	3	2	8	1	2	#NULL!	2	#NULL!	2	1	1	1	1	1	1	1	1	1	1	#NULL!	#NULL!	#NULL!	#NULL!	#NULL!	#NULL!	#NULL!	#NULL!	#NULL!	1	#NULL!	#NULL!	1	1	2	2	龙强
QSH-B8	2014-01-12	1	38	1	2	2	7	3	2	#NULL!	2	#NULL!	1	1	1	1	1	1	3	1	1	3	2	#NULL!	#NULL!	#NULL!	#NULL!	#NULL!	#NULL!	#NULL!	#NULL!	#NULL!	2	#NULL!	#NULL!	1	1	4	2	蔡丹桃
QYP-B36	2014-01-14	2	38	1	2	2	4	2	2	#NULL!	2	#NULL!	2	1	2	1	1	1	2	2	2	2	2	#NULL!	#NULL!	#NULL!	#NULL!	#NULL!	#NULL!	#NULL!	#NULL!	#NULL!	2	#NULL!	#NULL!	1	1	2	2	章文华
QYP-B102	2014-01-13	2	38	1	2	2	1	2	2	#NULL!	2	#NULL!	1	1	1	1	1	1	1	1	1	1	2	#NULL!	#NULL!	#NULL!	#NULL!	#NULL!	#NULL!	#NULL!	#NULL!	#NULL!	1	#NULL!	#NULL!	1	1	2	2	章文华
HGT-B20	2014-01-14	2	38	1	3	2	7	2	2	#NULL!	2	#NULL!	1	3	1	3	1	1	3	3	3	3	2	#NULL!	#NULL!	#NULL!	#NULL!	#NULL!	#NULL!	#NULL!	#NULL!	#NULL!	2	#NULL!	#NULL!	3	1	2	2	戚京城
AYX-B47	2014-01-10	1	38	1	3	2	8	1	2	#NULL!	2	#NULL!	2	1	1	1	1	1	1	1	1	1	2	#NULL!	#NULL!	#NULL!	#NULL!	#NULL!	#NULL!	#NULL!	#NULL!	#NULL!	3	#NULL!	#NULL!	1	1	2	2	肖芸
75	2013-12-29	1	38	1	3	2	1	2	2	#NULL!	2	#NULL!	1	3	1	1	1	2	2	2	2	2	2	#NULL!	#NULL!	#NULL!	#NULL!	#NULL!	#NULL!	#NULL!	#NULL!	#NULL!	1	#NULL!	#NULL!	1	1	2	2	郭双莉
77	2013-12-29	1	38	1	3	2	1	2	1	1	2	#NULL!	1	1	1	2	2	3	2	2	2	2	2	#NULL!	#NULL!	#NULL!	#NULL!	#NULL!	#NULL!	#NULL!	#NULL!	#NULL!	4	#NULL!	#NULL!	1	1	2	2	郭双莉
DH-B15	2014-01-13	1	38	1	4	2	5	1	2	#NULL!	1	1	1	1	1	1	1	1	1	1	1	1	1	1	1	1	1	2	1	1	1	1	4	1	2	1	1	2	2	朱春芳
XH-B49	2014-01-14	2	38	1	2	2	6	1	2	#NULL!	1	1	2	3	1	3	3	3	3	3	3	3	3	1	1	1	1	2	1	2	1	2	2	1	1	1	1	2	2	叶松
QSH-B13	2014-01-12	2	38	1	2	2	7	2	2	#NULL!	1	1	2	1	1	1	2	1	2	2	2	2	1	1	2	2	1	2	2	2	2	2	3	1	1	1	1	2	2	蔡丹桃
QSH-B38	2014-01-14	1	38	#NULL!	3	2	1	1	2	#NULL!	1	1	1	3	1	1	1	1	3	2	3	3	3	2	1	2	1	2	1	1	1	1	3	1	2	1	1	2	2	蔡丹桃
WL-B1	2014-01-14	2	38	1	2	2	1	1	2	#NULL!	1	1	2	1	1	1	1	2	2	2	2	2	2	2	2	2	1	2	1	1	1	2	2	1	1	1	1	2	2	饶裕莲
HGT-B10	2014-01-14	2	38	1	3	2	1	2	2	#NULL!	1	1	2	2	1	1	1	1	2	2	1	2	2	1	2	1	1	2	1	1	1	1	1	1	1	1	1	2	2	戚京城
HGT-B13	2014-01-14	2	38	1	4	2	5	2	2	#NULL!	1	1	1	2	1	1	1	1	2	2	2	2	2	2	2	1	1	2	1	1	1	1	1	1	1	1	1	1	2	戚京城
XJ-B32	2014-01-14	1	38	1	3	2	1	3	2	#NULL!	1	1	1	1	1	1	1	3	3	3	3	2	2	1	2	2	1	1	2	2	1	2	2	2	2	1	3	3	2	陈丽华
XJ-B78	2014-01-14	1	38	1	3	2	6	2	2	#NULL!	1	1	2	1	1	1	1	1	1	1	1	1	3	2	2	2	1	2	2	2	1	2	4	1	2	1	1	4	2	涂中兴
DH-B082	2014-01-14	1	38	1	3	2	5	2	2	#NULL!	1	2	2	1	1	1	1	1	1	1	1	1	1	2	2	1	1	1	2	2	1	2	1	2	2	1	1	1	2	龙强
XH-B75	2014-01-14	2	38	1	3	2	6	3	2	#NULL!	1	2	1	1	1	1	3	1	1	1	1	1	3	2	2	1	1	1	2	2	1	2	1	1	1	2	1	1	2	熊楚妮
XJ-B53	2014-01-14	1	38	1	5	2	9	2	2	#NULL!	1	3	1	1	1	1	1	3	3	3	3	2	3	1	2	1	1	1	2	2	1	2	2	2	2	1	3	3	2	陈丽华
XH-B103	2014-01-12	2	38	1	2	#NULL!	4	1	2	#NULL!	1	4	2	1	3	3	3	3	3	3	1	3	3	2	2	2	2	#NULL!	2	2	1	1	1	1	1	1	1	4	2	熊楚妮
XH-B21	2014-01-14	2	39	1	3	2	9	1	2	#NULL!	2	#NULL!	1	1	1	1	1	1	1	1	1	3	2	#NULL!	#NULL!	#NULL!	#NULL!	#NULL!	#NULL!	#NULL!	#NULL!	#NULL!	1	#NULL!	#NULL!	1	1	1	2	熊楚妮
XH-B43	2014-01-14	#NULL!	39	1	2	1	2	1	2	#NULL!	2	#NULL!	1	1	3	3	3	1	3	3	3	3	3	#NULL!	#NULL!	#NULL!	#NULL!	#NULL!	#NULL!	#NULL!	#NULL!	#NULL!	2	#NULL!	#NULL!	1	1	2	2	熊楚妮
XH-B50	2014-01-14	2	39	1	4	1	9	1	2	#NULL!	2	#NULL!	#NULL!	1	1	1	1	1	1	1	1	2	1	#NULL!	#NULL!	#NULL!	#NULL!	#NULL!	#NULL!	#NULL!	#NULL!	#NULL!	1	#NULL!	#NULL!	1	1	4	2	熊楚妮
QYP-B101	2014-01-13	1	39	1	2	2	1	1	2	#NULL!	2	#NULL!	1	1	1	1	1	1	1	1	1	1	2	#NULL!	#NULL!	#NULL!	#NULL!	#NULL!	#NULL!	#NULL!	#NULL!	#NULL!	1	#NULL!	#NULL!	1	1	2	2	章文华
WL-B18	2014-01-14	2	39	1	3	2	1	2	2	#NULL!	2	#NULL!	3	3	3	1	3	3	3	2	1	3	3	#NULL!	#NULL!	#NULL!	#NULL!	#NULL!	#NULL!	#NULL!	#NULL!	#NULL!	2	#NULL!	#NULL!	3	3	2	2	饶裕莲
305	2013-12-31	1	39	1	2	2	6	2	2	#NULL!	2	#NULL!	2	1	1	1	2	1	1	1	1	3	1	#NULL!	#NULL!	#NULL!	#NULL!	#NULL!	#NULL!	#NULL!	#NULL!	#NULL!	2	#NULL!	#NULL!	1	1	1	2	王斌
XH-B53	2014-01-14	1	39	1	4	2	6	2	2	#NULL!	1	1	1	1	1	3	1	1	1	1	1	3	3	2	2	1	1	1	2	2	1	2	1	1	2	1	1	4	2	兰彪
XH-B109	2014-01-12	1	39	1	4	2	1	2	2	#NULL!	1	1	1	1	1	3	2	1	2	2	3	3	3	2	2	2	2	#NULL!	2	2	2	2	1	1	1	1	1	2	2	兰彪
XHQ-B165	2014-01-13	2	39	1	3	2	7	3	2	#NULL!	1	1	1	1	1	1	1	1	1	1	1	3	3	2	2	1	1	1	2	2	2	2	1	1	1	1	1	4	2	胡玉城
QYP-B18	2014-01-14	2	39	1	3	2	4	2	2	#NULL!	1	1	1	1	1	1	1	1	1	2	1	2	3	2	2	2	2	#NULL!	2	2	2	2	1	2	2	1	1	2	2	邓云兰
HGT-B24	2014-01-14	1	39	1	1	2	4	2	2	#NULL!	1	1	2	1	1	1	1	1	2	2	1	1	2	1	2	1	2	#NULL!	1	1	1	1	2	1	1	1	1	2	2	戚京城
201	2013-12-30	1	39	2	2	2	1	1	2	#NULL!	1	1	1	1	1	1	1	1	1	1	1	1	2	1	1	1	1	2	1	1	1	1	3	1	1	1	1	1	2	彭时辉
DH-B63	2014-01-14	2	39	1	1	2	4	1	2	#NULL!	1	2	2	1	1	1	1	1	1	3	1	3	3	2	2	1	1	1	2	2	1	2	1	1	1	1	1	2	2	龙强
QSH-B25	2014-01-14	2	39	#NULL!	2	2	1	2	1	2	1	2	2	1	1	1	1	3	1	1	1	3	3	2	2	2	1	2	2	2	1	2	2	1	1	1	1	1	2	蔡丹桃
XJ-B26	2014-01-14	2	39	1	3	1	1	2	2	#NULL!	1	2	1	1	1	1	1	1	1	1	1	1	1	2	2	2	1	2	2	2	1	2	4	1	2	1	1	1	2	凌荣明
XJX-B089	2014-01-14	1	39	1	3	2	8	2	2	#NULL!	1	2	1	1	1	1	1	1	1	1	1	1	3	2	2	2	1	1	2	2	1	2	2	1	2	1	1	2	2	谢玉庆
403	2013-12-31	2	39	1	4	2	9	1	2	#NULL!	1	2	2	1	1	1	1	1	1	1	1	1	1	1	1	1	1	2	1	1	1	1	1	1	1	1	1	2	2	王斌
XJX-B130	2014-01-14	1	39	1	3	2	1	3	2	#NULL!	1	3	2	1	1	1	1	1	1	1	1	1	3	2	2	2	1	1	1	2	2	1	1	1	1	1	1	1	2	涂中兴
XH-B06	2014-01-14	2	39	1	2	2	5	2	2	#NULL!	1	4	1	3	3	1	1	3	3	3	1	3	3	2	2	1	1	1	2	1	2	2	3	1	1	1	1	4	2	叶松
XH-B117	2014-01-12	2	39	1	3	2	1	2	2	#NULL!	1	4	1	1	1	1	1	1	1	1	1	1	2	2	1	2	2	#NULL!	2	2	2	2	1	1	1	1	1	2	2	兰彪
QSH-B26	2014-01-14	2	40	#NULL!	3	2	5	1	2	#NULL!	2	#NULL!	3	1	1	1	1	1	1	1	1	2	2	#NULL!	#NULL!	#NULL!	#NULL!	#NULL!	#NULL!	#NULL!	#NULL!	#NULL!	3	#NULL!	#NULL!	1	1	2	2	蔡丹桃
QYP-B28	2014-01-14	1	40	1	3	2	1	2	2	#NULL!	2	#NULL!	2	1	1	1	1	1	1	1	1	1	1	#NULL!	#NULL!	#NULL!	#NULL!	#NULL!	#NULL!	#NULL!	#NULL!	#NULL!	2	#NULL!	#NULL!	1	1	1	2	周军华
QYP-B37	2014-01-14	1	40	1	3	2	5	3	2	#NULL!	2	#NULL!	2	1	3	1	1	1	3	3	3	3	2	#NULL!	#NULL!	#NULL!	#NULL!	#NULL!	#NULL!	#NULL!	#NULL!	#NULL!	2	#NULL!	#NULL!	1	3	3	2	章文华
QYP-B63	2014-01-16	1	40	1	2	2	1	3	2	#NULL!	2	#NULL!	1	3	3	3	3	3	3	3	3	3	3	#NULL!	#NULL!	#NULL!	#NULL!	#NULL!	#NULL!	#NULL!	#NULL!	#NULL!	4	#NULL!	#NULL!	3	3	3	2	周军华
QYP-B65	2014-01-16	2	40	1	3	2	4	3	2	#NULL!	2	#NULL!	1	1	3	1	3	3	3	3	3	3	3	#NULL!	#NULL!	#NULL!	#NULL!	#NULL!	#NULL!	#NULL!	#NULL!	#NULL!	1	#NULL!	#NULL!	3	2	2	2	周军华
WL-B17	2014-01-14	1	40	1	3	2	1	2	2	#NULL!	2	#NULL!	2	3	1	1	3	3	3	3	3	3	3	#NULL!	#NULL!	#NULL!	#NULL!	#NULL!	#NULL!	#NULL!	#NULL!	#NULL!	2	#NULL!	#NULL!	1	1	2	2	饶裕莲
WL-B34	2014-01-14	1	40	1	2	2	4	2	2	#NULL!	2	#NULL!	2	1	2	1	3	1	2	3	3	3	2	#NULL!	#NULL!	#NULL!	#NULL!	#NULL!	#NULL!	#NULL!	#NULL!	#NULL!	2	#NULL!	#NULL!	3	3	2	2	饶裕莲
AYX-B44	2014-01-13	2	40	1	2	2	1	2	2	#NULL!	2	#NULL!	3	1	1	1	1	1	1	1	1	1	1	#NULL!	#NULL!	#NULL!	#NULL!	#NULL!	#NULL!	#NULL!	#NULL!	#NULL!	3	#NULL!	#NULL!	1	1	2	2	肖芸
76	2013-12-30	1	40	1	1	2	1	1	1	1	2	#NULL!	1	3	3	3	3	3	3	3	3	3	3	#NULL!	#NULL!	#NULL!	#NULL!	#NULL!	#NULL!	#NULL!	#NULL!	#NULL!	4	#NULL!	#NULL!	1	1	4	2	郭双莉
9	2013-12-30	1	40	1	3	1	1	1	1	1	2	#NULL!	#NULL!	1	1	1	1	2	2	3	3	2	2	#NULL!	#NULL!	#NULL!	#NULL!	#NULL!	#NULL!	#NULL!	#NULL!	#NULL!	2	#NULL!	#NULL!	1	1	2	2	郭双莉
412	2013-12-31	1	40	1	2	2	5	4	2	#NULL!	2	#NULL!	1	1	1	1	1	1	1	1	1	2	2	#NULL!	#NULL!	#NULL!	#NULL!	#NULL!	#NULL!	#NULL!	#NULL!	#NULL!	1	#NULL!	#NULL!	1	1	1	2	王斌
XHQ-B185	2014-01-13	1	40	1	3	2	7	2	2	#NULL!	1	1	1	1	1	1	1	1	1	1	1	2	2	2	1	1	1	1	2	2	2	2	1	1	1	1	1	2	2	胡玉城
QSH-B6	2014-01-12	2	40	1	2	2	5	1	2	#NULL!	1	1	1	1	1	1	1	1	1	1	1	1	1	1	1	1	1	2	1	1	1	2	3	1	1	1	1	2	2	蔡丹桃
QSH-B11	2014-01-12	2	40	1	2	2	7	1	2	#NULL!	1	1	1	1	1	1	1	2	2	2	2	2	2	2	2	2	1	1	2	2	1	1	1	2	3	2	1	2	2	蔡丹桃
XJ-B6	2014-01-14	1	40	1	5	2	9	#NULL!	2	#NULL!	1	1	2	1	1	1	1	1	1	1	1	1	3	2	2	2	1	1	2	2	1	2	2	1	1	1	1	2	2	凌荣明
XJ-B16	2014-01-14	2	40	1	3	#NULL!	9	1	2	#NULL!	1	1	1	1	1	1	1	1	1	1	1	1	3	2	2	2	1	1	2	2	1	2	1	1	1	1	1	1	2	凌荣明
XJ-B21	2014-01-14	1	40	1	3	2	4	2	2	#NULL!	1	1	2	1	1	1	3	3	3	3	3	2	3	1	2	2	1	1	2	2	1	2	3	2	2	1	3	3	2	陈丽华
XJ-B50	2014-01-14	2	40	1	3	2	1	3	2	#NULL!	1	1	1	1	1	1	1	3	3	3	3	3	3	1	2	2	1	1	2	2	1	2	1	2	2	1	3	3	2	陈丽华
XJ-B51	2014-01-14	2	40	1	2	2	1	2	2	#NULL!	1	1	1	1	1	1	1	3	3	3	3	3	2	1	2	2	1	1	2	2	1	2	2	2	2	1	3	3	2	陈丽华
XJX-B083	2014-01-14	2	40	1	3	2	7	1	2	#NULL!	1	1	2	1	1	1	1	1	1	1	1	1	3	2	2	2	1	2	2	2	1	2	1	1	2	1	1	2	2	涂中兴
XJX-B094	2014-01-14	1	40	3	3	2	1	#NULL!	2	#NULL!	1	1	1	1	1	1	1	1	1	1	1	1	3	2	2	2	1	2	2	2	1	2	2	1	2	1	1	2	2	涂中兴
103	2013-12-30	1	40	1	3	2	1	2	2	#NULL!	1	1	1	1	1	1	1	1	1	1	1	2	1	1	1	1	1	2	2	2	1	1	3	1	1	1	1	2	2	郭双莉
121	2013-12-30	1	40	1	4	2	1	1	1	1	2	1	2	1	1	1	1	1	1	1	2	2	2	#NULL!	#NULL!	#NULL!	#NULL!	#NULL!	#NULL!	#NULL!	#NULL!	#NULL!	2	#NULL!	#NULL!	1	1	2	2	魏贵英
206	2013-12-30	1	40	1	5	2	1	1	1	1	1	1	1	1	1	1	3	2	1	3	3	3	2	2	2	1	2	#NULL!	1	1	1	1	2	1	1	1	1	2	2	彭时辉
209	2013-12-30	1	40	1	3	2	1	1	1	1	1	1	1	2	1	1	2	1	2	2	2	2	2	2	2	1	1	1	2	2	2	2	2	1	3	2	2	2	2	彭时辉
152	2013-12-30	1	40	1	3	2	1	4	2	#NULL!	1	1	1	1	1	1	1	2	2	2	2	2	2	2	2	1	1	2	1	2	1	2	2	1	1	1	1	4	2	彭时辉
DH-B54	2014-01-14	1	40	1	3	2	6	1	2	#NULL!	1	2	2	1	1	1	1	1	1	1	1	3	3	2	2	1	1	1	2	2	1	2	1	1	2	1	1	2	2	龙强
DH-B56	2014-01-14	2	40	1	3	1	5	2	2	#NULL!	1	2	1	1	1	1	1	1	1	1	1	3	1	2	2	1	1	1	2	2	1	2	1	1	1	1	1	2	2	龙强
DH-B112	2014-01-12	#NULL!	40	#NULL!	#NULL!	2	5	#NULL!	2	#NULL!	1	2	1	1	1	1	1	3	3	3	3	3	2	2	2	2	2	#NULL!	2	2	2	2	3	2	1	1	2	2	2	郭艳萍
XH-B41	2014-01-14	2	40	1	2	#NULL!	5	1	2	#NULL!	1	2	1	3	3	3	3	3	3	3	3	3	3	2	2	1	1	1	2	2	1	2	2	1	1	1	1	2	2	叶松
XH-B57	2014-01-14	2	40	1	3	2	4	2	2	#NULL!	1	2	1	1	1	1	1	1	1	1	1	3	3	2	2	1	2	#NULL!	2	2	1	2	1	1	1	1	1	1	2	兰彪
XH-B73	2014-01-14	2	40	1	3	2	4	2	2	#NULL!	1	2	1	1	1	1	1	1	1	1	1	3	1	2	2	1	2	#NULL!	2	2	1	2	1	1	1	1	1	2	2	兰彪
QSH-B21	2014-01-13	2	40	#NULL!	2	2	4	1	2	#NULL!	1	2	2	1	1	1	1	1	3	3	3	3	2	2	2	1	1	2	2	2	1	1	3	2	2	1	1	2	2	蔡丹桃
XJX-B091	2014-01-14	1	40	1	3	2	1	3	2	#NULL!	1	2	1	1	1	1	1	1	1	1	1	1	3	2	2	2	1	1	2	2	1	2	1	1	2	1	1	3	2	涂中兴
XJX-B095	2014-01-14	1	40	1	3	2	5	3	2	#NULL!	1	2	1	1	1	1	1	1	1	1	1	1	2	2	2	2	1	2	2	2	1	2	3	1	2	1	1	2	2	涂中兴
XJX-B102	2014-01-14	2	40	1	3	2	7	2	2	#NULL!	1	2	1	1	1	1	1	1	1	1	1	1	3	2	2	2	1	1	2	2	1	2	2	1	2	1	1	2	2	涂中兴
215	2013-12-30	1	40	1	2	2	1	2	1	1	1	2	2	2	1	1	1	1	2	2	2	2	2	1	1	1	1	1	1	1	1	1	2	2	1	1	1	2	2	彭时辉
XJ-B22	2014-01-14	2	40	1	3	1	1	2	1	2	1	3	1	1	1	1	3	3	3	3	3	2	2	1	2	2	1	1	2	2	1	2	3	2	2	1	3	3	2	陈丽华
QSH-B7	2014-01-12	1	40	1	2	2	4	2	2	#NULL!	1	4	1	2	1	1	1	3	1	3	3	3	2	1	2	1	1	2	1	2	1	2	1	2	4	1	1	2	2	蔡丹桃
53	2013-12-30	2	40	1	2	2	1	4	2	#NULL!	1	4	1	1	1	1	1	2	1	1	1	2	1	1	1	1	1	1	1	1	1	1	1	1	2	1	1	1	2	郭双莉
DH-B2	2014-01-12	2	41	1	2	2	1	2	2	#NULL!	2	#NULL!	1	1	1	1	1	1	1	3	1	3	1	#NULL!	#NULL!	#NULL!	#NULL!	#NULL!	#NULL!	#NULL!	#NULL!	#NULL!	1	#NULL!	#NULL!	1	1	2	2	朱春芳
DH-B14	2014-01-13	2	41	1	2	2	10	1	2	#NULL!	2	#NULL!	1	1	1	1	3	1	1	1	1	3	3	#NULL!	#NULL!	#NULL!	#NULL!	#NULL!	#NULL!	#NULL!	#NULL!	#NULL!	1	#NULL!	#NULL!	1	1	2	2	朱春芳
DH-B50	2014-01-14	2	41	1	2	2	6	2	2	#NULL!	2	#NULL!	2	1	1	1	1	1	1	1	1	1	1	#NULL!	#NULL!	#NULL!	#NULL!	#NULL!	#NULL!	#NULL!	#NULL!	#NULL!	2	#NULL!	#NULL!	1	1	2	2	朱春芳
QSH-B19	2014-01-13	1	41	#NULL!	3	1	7	2	2	#NULL!	2	#NULL!	2	1	1	1	1	1	1	1	1	3	1	#NULL!	#NULL!	#NULL!	#NULL!	#NULL!	#NULL!	#NULL!	#NULL!	#NULL!	1	#NULL!	#NULL!	1	1	2	2	蔡丹桃
QSH-B50	2014-01-14	2	41	1	2	2	4	2	2	#NULL!	2	#NULL!	1	1	3	1	3	3	3	3	3	3	3	#NULL!	#NULL!	#NULL!	#NULL!	#NULL!	#NULL!	#NULL!	#NULL!	#NULL!	2	#NULL!	#NULL!	3	3	1	2	郭金
QYP-B60	2014-01-17	2	41	1	2	2	1	2	2	#NULL!	2	#NULL!	1	1	1	1	1	1	1	1	1	1	1	#NULL!	#NULL!	#NULL!	#NULL!	#NULL!	#NULL!	#NULL!	#NULL!	#NULL!	1	#NULL!	#NULL!	1	1	2	2	张莉
QYP-B64	2014-01-16	2	41	1	3	2	7	1	2	#NULL!	2	#NULL!	2	1	2	1	1	1	1	3	1	2	3	#NULL!	#NULL!	#NULL!	#NULL!	#NULL!	#NULL!	#NULL!	#NULL!	#NULL!	1	#NULL!	#NULL!	1	1	2	2	章文华
QYP-B103	2014-01-13	1	41	1	2	2	1	1	2	#NULL!	2	#NULL!	1	1	1	1	1	1	1	1	1	1	1	#NULL!	#NULL!	#NULL!	#NULL!	#NULL!	#NULL!	#NULL!	#NULL!	#NULL!	2	#NULL!	#NULL!	1	1	2	2	章文华
WL-B30	2014-01-14	2	41	1	3	2	1	2	2	#NULL!	2	#NULL!	1	2	1	1	1	1	3	2	1	1	2	#NULL!	#NULL!	#NULL!	#NULL!	#NULL!	#NULL!	#NULL!	#NULL!	#NULL!	4	#NULL!	#NULL!	1	1	2	2	饶裕莲
AYX-B38	2014-01-13	2	41	1	3	2	1	3	2	#NULL!	2	#NULL!	2	1	1	1	1	1	1	1	1	1	1	#NULL!	#NULL!	#NULL!	#NULL!	#NULL!	#NULL!	#NULL!	#NULL!	#NULL!	2	#NULL!	#NULL!	1	1	2	2	杨昌林
216	2013-12-30	2	41	1	2	2	1	3	2	#NULL!	2	#NULL!	1	2	1	1	1	3	3	3	3	3	3	#NULL!	#NULL!	#NULL!	#NULL!	#NULL!	#NULL!	#NULL!	#NULL!	#NULL!	4	#NULL!	#NULL!	1	1	2	2	彭时辉
313	2013-12-31	2	41	1	2	2	4	2	2	#NULL!	2	#NULL!	1	1	1	1	1	2	2	2	2	2	2	#NULL!	#NULL!	#NULL!	#NULL!	#NULL!	#NULL!	#NULL!	#NULL!	#NULL!	4	#NULL!	#NULL!	1	1	2	2	彭时辉
XH-B45	2014-01-14	2	41	1	2	2	2	2	2	#NULL!	1	1	1	3	3	3	3	3	3	3	3	3	3	2	2	1	1	1	2	1	2	2	1	1	1	1	1	1	2	熊楚妮
XH-B093	2014-01-12	1	41	1	2	1	5	1	2	#NULL!	1	1	1	1	3	3	3	1	3	3	3	3	3	2	1	1	2	#NULL!	2	2	1	1	1	1	1	1	1	2	2	叶松
XHQ-B174	2014-01-13	2	41	1	3	#NULL!	1	2	2	#NULL!	1	1	1	1	1	1	1	1	1	1	1	2	2	2	2	1	2	#NULL!	2	2	2	2	3	1	1	1	1	2	2	兰彪
QSH-B23	2014-01-13	2	41	#NULL!	3	2	1	1	1	1	1	1	2	3	1	1	1	1	3	3	3	3	2	2	2	1	1	1	2	2	1	2	1	3	1	2	1	2	2	蔡丹桃
QYP-B55	2014-01-15	2	41	1	2	2	4	1	2	#NULL!	1	1	1	1	1	1	1	1	1	1	1	1	1	2	2	1	2	#NULL!	2	2	2	2	1	2	2	1	1	1	2	李洪玲
QYP-B82	2014-01-12	2	41	1	2	2	4	1	2	#NULL!	1	1	1	1	1	1	1	1	1	1	1	1	1	2	2	1	1	2	2	2	1	2	1	1	1	1	1	2	2	李洪玲
XJ-B62	2014-01-14	2	41	1	3	2	9	1	3	#NULL!	1	1	2	1	1	1	1	3	3	3	3	2	3	1	1	1	1	1	2	2	1	2	2	2	2	1	3	3	2	涂中兴
112	2013-12-30	2	41	1	2	2	1	4	2	#NULL!	1	1	1	1	2	2	2	2	2	2	3	2	2	2	2	2	2	#NULL!	2	2	1	1	1	1	4	3	1	2	2	郭双莉
320	2013-12-31	1	41	1	3	#NULL!	1	1	#NULL!	#NULL!	1	1	1	1	1	1	1	2	2	2	2	2	2	1	1	1	1	1	1	1	1	1	1	1	1	1	1	4	2	王斌
DH-B095	2014-01-14	1	41	1	2	2	4	1	2	#NULL!	1	2	1	1	1	1	1	1	2	2	2	2	2	2	2	2	2	#NULL!	2	2	1	2	1	2	1	1	2	2	2	龙强
XH-B091	2014-01-12	2	41	1	3	2	1	3	2	#NULL!	1	2	2	1	3	3	3	1	3	3	3	3	3	2	1	2	2	#NULL!	2	2	1	1	1	1	1	1	1	2	2	熊楚妮
XJX-B118	2014-01-14	1	41	1	4	2	9	2	2	#NULL!	1	2	2	1	1	1	1	1	1	1	1	1	3	2	2	2	1	2	2	2	1	2	4	1	1	1	1	2	2	涂中兴
404	2013-12-31	1	41	1	4	2	9	2	2	#NULL!	1	2	2	1	1	1	1	1	1	1	1	1	#NULL!	1	2	1	1	2	1	1	1	1	1	1	1	1	1	4	2	王斌
113	2013-12-29	2	41	1	4	1	1	3	1	1	1	3	1	2	1	1	1	1	2	2	2	2	2	1	1	1	1	2	1	1	1	2	1	1	1	1	1	2	2	彭时辉
XH-B42	2014-01-14	#NULL!	41	1	#NULL!	2	1	1	2	#NULL!	1	4	1	1	1	3	3	1	3	3	3	3	3	2	2	1	1	1	1	1	1	1	1	1	1	1	1	2	2	熊楚妮
DH-B28	2014-01-14	1	42	1	3	2	1	1	2	#NULL!	2	#NULL!	2	1	1	1	1	1	1	1	1	3	3	#NULL!	#NULL!	#NULL!	#NULL!	#NULL!	#NULL!	#NULL!	#NULL!	#NULL!	1	#NULL!	#NULL!	1	1	2	2	朱春芳
DH-B113	2014-01-12	1	42	1	2	2	1	1	2	#NULL!	2	#NULL!	2	1	1	1	1	1	1	1	1	3	3	#NULL!	#NULL!	#NULL!	#NULL!	#NULL!	#NULL!	#NULL!	#NULL!	#NULL!	1	#NULL!	#NULL!	1	1	2	2	郭艳萍
DH-B125	2014-01-13	2	42	1	2	2	10	1	2	#NULL!	2	#NULL!	2	1	1	1	1	3	1	1	3	3	3	#NULL!	#NULL!	#NULL!	#NULL!	#NULL!	#NULL!	#NULL!	#NULL!	#NULL!	1	#NULL!	#NULL!	1	1	2	2	郭艳萍
DH-B134	2014-01-13	1	42	1	2	2	8	1	2	#NULL!	2	#NULL!	2	1	1	1	1	1	1	1	1	1	3	#NULL!	#NULL!	#NULL!	#NULL!	#NULL!	#NULL!	#NULL!	#NULL!	#NULL!	1	#NULL!	#NULL!	1	1	2	2	郭艳萍
XH-B12	2014-01-14	2	42	1	2	2	1	1	2	#NULL!	2	#NULL!	1	1	1	1	1	1	1	1	1	2	1	#NULL!	#NULL!	#NULL!	#NULL!	#NULL!	#NULL!	#NULL!	#NULL!	#NULL!	2	#NULL!	#NULL!	3	1	4	2	叶松
XH-B24	2014-01-14	2	42	1	3	2	4	2	2	#NULL!	2	#NULL!	1	1	1	1	1	1	1	1	1	3	1	#NULL!	#NULL!	#NULL!	#NULL!	#NULL!	#NULL!	#NULL!	#NULL!	#NULL!	1	#NULL!	#NULL!	3	3	3	2	叶松
XH-B61	2014-01-14	1	42	1	3	2	1	2	2	#NULL!	2	#NULL!	2	1	1	1	1	1	1	1	1	1	1	#NULL!	#NULL!	#NULL!	#NULL!	#NULL!	#NULL!	#NULL!	#NULL!	#NULL!	2	#NULL!	#NULL!	1	1	2	2	叶松
XHQ-B183	2014-01-13	1	42	1	3	2	1	2	2	#NULL!	2	#NULL!	1	1	1	1	1	1	1	1	1	3	2	#NULL!	#NULL!	#NULL!	#NULL!	#NULL!	#NULL!	#NULL!	#NULL!	#NULL!	4	#NULL!	#NULL!	3	3	2	2	胡玉城
QYP-B48	2014-01-15	2	42	1	3	2	4	1	2	#NULL!	2	#NULL!	3	1	1	1	1	1	1	1	1	1	1	#NULL!	#NULL!	#NULL!	#NULL!	#NULL!	#NULL!	#NULL!	#NULL!	#NULL!	3	#NULL!	#NULL!	1	1	1	2	张莉
QYP-B54	2014-01-15	2	42	1	3	2	4	1	2	#NULL!	2	#NULL!	1	3	3	3	3	3	3	3	3	3	3	#NULL!	#NULL!	#NULL!	#NULL!	#NULL!	#NULL!	#NULL!	#NULL!	#NULL!	1	#NULL!	#NULL!	3	3	1	2	张莉
QYP-B73	2014-01-17	2	42	1	2	2	1	3	2	#NULL!	2	#NULL!	1	1	1	1	2	1	3	3	3	2	2	#NULL!	#NULL!	#NULL!	#NULL!	#NULL!	#NULL!	#NULL!	#NULL!	#NULL!	2	#NULL!	#NULL!	3	1	2	2	邓云兰
HGT-B18	2014-01-14	1	42	1	4	2	9	2	2	#NULL!	2	#NULL!	#NULL!	#NULL!	#NULL!	#NULL!	#NULL!	#NULL!	#NULL!	#NULL!	#NULL!	#NULL!	#NULL!	#NULL!	#NULL!	#NULL!	#NULL!	#NULL!	#NULL!	#NULL!	#NULL!	#NULL!	#NULL!	#NULL!	#NULL!	#NULL!	#NULL!	#NULL!	2	戚京城
AYX-B4	2014-01-10	2	42	1	3	2	1	1	2	#NULL!	2	#NULL!	1	3	3	3	3	3	3	3	3	3	3	#NULL!	#NULL!	#NULL!	#NULL!	#NULL!	#NULL!	#NULL!	#NULL!	#NULL!	1	#NULL!	#NULL!	3	3	4	2	李才火
101	2013-12-29	1	42	1	3	2	9	1	2	#NULL!	2	#NULL!	1	1	1	1	1	1	1	2	1	3	2	#NULL!	#NULL!	#NULL!	#NULL!	#NULL!	#NULL!	#NULL!	#NULL!	#NULL!	2	#NULL!	#NULL!	3	2	1	2	彭时辉
226	2013-12-30	2	42	1	2	2	1	1	2	#NULL!	2	#NULL!	1	3	3	3	3	3	3	3	3	3	3	#NULL!	#NULL!	#NULL!	#NULL!	#NULL!	#NULL!	#NULL!	#NULL!	#NULL!	4	#NULL!	#NULL!	3	3	2	2	彭时辉
419	2013-12-31	2	42	1	2	2	4	1	2	#NULL!	2	#NULL!	1	3	1	1	1	3	2	2	2	2	2	#NULL!	#NULL!	#NULL!	#NULL!	#NULL!	#NULL!	#NULL!	#NULL!	#NULL!	4	#NULL!	#NULL!	1	1	4	2	王斌
DH-B100	2014-01-14	2	42	#NULL!	#NULL!	2	4	#NULL!	2	#NULL!	1	1	1	1	1	1	2	1	2	2	2	2	2	2	2	2	2	#NULL!	2	1	2	2	2	2	1	1	2	2	2	龙强
DH-B116	2014-01-12	2	42	1	2	2	1	1	2	#NULL!	1	1	1	1	1	1	1	1	1	1	1	2	1	2	2	1	1	1	2	2	1	2	1	1	1	1	1	2	2	郭艳萍
XH-B46	2014-01-14	#NULL!	42	#NULL!	1	#NULL!	1	2	2	#NULL!	1	1	1	3	3	3	3	3	3	3	3	3	3	2	2	1	2	#NULL!	2	1	2	2	1	1	1	1	3	#NULL!	2	叶松
XH-B119	2014-01-12	2	42	1	2	2	1	2	2	#NULL!	1	1	1	1	1	1	1	1	1	1	1	1	2	2	2	2	2	#NULL!	2	2	2	2	1	1	1	1	1	2	2	兰彪
XHQ-B180	2014-01-13	2	42	1	2	2	4	1	2	#NULL!	1	1	1	1	1	1	1	1	1	1	1	2	2	2	2	2	2	#NULL!	2	2	2	2	3	1	1	1	1	2	2	兰彪
WL-B27	2014-01-14	2	42	1	3	2	1	2	2	#NULL!	1	1	1	3	3	1	1	1	2	2	1	2	2	2	2	1	1	1	2	2	1	2	2	1	2	3	3	2	2	汪玮
XJ-B29	2014-01-14	1	42	1	3	2	4	3	2	#NULL!	1	1	3	1	1	1	1	1	1	1	1	1	1	2	2	2	1	1	2	2	1	2	3	2	3	1	1	1	2	凌荣明
XJ-B46	2014-01-14	1	42	1	3	2	1	1	2	#NULL!	1	1	1	1	1	1	1	3	3	3	3	2	2	1	2	2	1	1	2	2	1	2	2	2	1	1	3	3	2	陈丽华
XJ-B54	2014-01-14	1	42	1	3	2	9	2	2	#NULL!	1	1	2	1	1	1	1	3	3	3	3	3	2	1	1	1	1	1	2	2	1	2	2	2	2	1	3	3	2	陈丽华
XJ-B64	2014-01-14	2	42	1	3	2	1	1	2	#NULL!	1	1	1	1	1	1	1	3	2	3	3	2	3	1	1	1	2	#NULL!	2	2	1	2	2	2	2	1	3	3	2	涂中兴
XJ-B66	2014-01-14	1	42	1	3	2	5	1	2	#NULL!	1	1	1	1	1	1	1	3	3	3	3	2	3	1	1	1	2	#NULL!	2	2	1	2	3	2	2	1	3	3	2	谢玉庆
XJX-B099	2014-01-14	2	42	1	3	2	1	3	2	#NULL!	1	1	1	1	1	1	1	1	1	1	1	1	3	2	2	2	1	1	2	2	1	2	3	1	1	1	1	1	2	涂中兴
222	2013-12-30	2	42	1	4	2	3	1	2	#NULL!	1	1	1	1	1	1	1	1	2	2	2	2	2	2	2	2	2	#NULL!	1	2	1	2	4	1	2	1	1	2	2	彭时辉
307	2013-12-30	2	42	1	2	2	1	2	1	1	1	1	2	1	1	1	1	1	1	1	1	1	1	1	1	1	1	2	1	1	1	1	4	2	2	1	1	4	2	彭时辉
XH-B65	2014-01-14	1	42	1	3	2	6	3	1	#NULL!	1	2	1	1	1	1	1	1	1	1	1	3	2	2	2	2	2	#NULL!	2	2	1	2	1	1	4	1	1	2	2	叶松
XHQ-B161	2014-01-13	2	42	1	2	#NULL!	7	1	2	#NULL!	1	2	1	3	#NULL!	#NULL!	#NULL!	1	3	#NULL!	#NULL!	#NULL!	#NULL!	1	1	1	1	1	2	2	2	2	1	1	1	1	1	4	2	熊楚妮
QYP-B40	2014-01-14	2	42	1	2	2	4	2	2	#NULL!	1	2	2	1	2	1	1	1	3	3	3	3	2	2	2	2	1	1	2	2	2	2	2	2	2	1	1	2	2	章文华
QYP-B97	2014-01-13	2	42	1	2	2	5	2	2	#NULL!	1	2	2	1	1	1	1	1	1	3	1	2	2	2	2	1	1	2	2	2	1	1	3	1	1	1	1	2	2	章文华
XJ-B56	2014-01-14	1	42	1	4	2	7	1	2	#NULL!	1	2	2	1	1	1	1	3	3	3	3	3	2	1	2	1	2	#NULL!	2	2	1	2	2	2	2	1	3	2	2	涂中兴
70	2013-12-29	1	42	1	4	2	1	2	2	#NULL!	1	2	1	2	1	1	1	1	2	2	2	2	2	1	1	1	1	1	1	1	1	1	3	1	1	1	1	1	2	郭双莉
DH-B19	2014-01-13	2	42	1	2	2	1	1	2	#NULL!	1	3	1	1	1	1	1	1	3	1	1	3	3	2	2	1	1	2	1	2	1	2	1	1	1	1	1	1	2	朱春芳
XJ-B15	2014-01-14	1	42	1	4	1	9	2	2	#NULL!	1	3	2	1	1	1	1	1	1	1	1	1	2	2	2	2	1	2	2	2	1	2	2	2	2	1	1	2	2	凌荣明
XH-B133	2014-01-12	2	42	1	2	2	4	2	2	#NULL!	1	4	1	1	1	1	1	1	1	1	1	1	1	2	2	2	2	#NULL!	2	2	2	2	3	1	1	1	1	2	2	兰彪
XH-B149	2014-01-13	2	42	1	#NULL!	#NULL!	6	#NULL!	#NULL!	#NULL!	1	4	1	1	3	3	3	3	3	3	3	3	3	2	1	1	1	1	2	1	1	1	1	1	1	1	1	2	2	王蓉
DH-B6	2014-01-12	2	43	1	2	2	1	2	2	#NULL!	2	#NULL!	1	1	1	3	1	3	3	3	3	3	3	#NULL!	#NULL!	#NULL!	#NULL!	#NULL!	#NULL!	#NULL!	#NULL!	#NULL!	1	#NULL!	#NULL!	1	1	2	2	朱春芳
DH-B081	2014-01-14	1	43	1	3	2	4	1	2	#NULL!	2	#NULL!	2	1	1	1	1	1	1	1	1	1	3	#NULL!	#NULL!	#NULL!	#NULL!	#NULL!	#NULL!	#NULL!	#NULL!	#NULL!	1	#NULL!	#NULL!	1	1	2	2	龙强
XH-B30	2014-01-14	2	43	1	2	2	1	2	2	#NULL!	2	#NULL!	1	1	1	1	1	1	1	1	1	3	3	#NULL!	#NULL!	#NULL!	#NULL!	#NULL!	#NULL!	#NULL!	#NULL!	#NULL!	2	#NULL!	#NULL!	1	1	1	2	叶松
XH-B55	2014-01-14	1	43	1	3	2	1	2	2	#NULL!	2	#NULL!	#NULL!	1	1	1	1	1	3	3	3	1	3	#NULL!	#NULL!	#NULL!	#NULL!	#NULL!	#NULL!	#NULL!	#NULL!	#NULL!	1	#NULL!	#NULL!	1	1	2	2	叶松
XH-B80	2014-01-14	2	43	1	3	2	6	#NULL!	2	#NULL!	2	#NULL!	1	1	3	1	3	1	1	1	1	1	1	#NULL!	#NULL!	#NULL!	#NULL!	#NULL!	#NULL!	#NULL!	#NULL!	#NULL!	1	#NULL!	#NULL!	1	1	4	2	叶松
XH-B157	2014-01-13	2	43	1	2	#NULL!	6	1	2	#NULL!	2	#NULL!	1	1	3	3	3	1	3	3	3	3	3	#NULL!	#NULL!	#NULL!	#NULL!	#NULL!	#NULL!	#NULL!	#NULL!	#NULL!	1	#NULL!	#NULL!	1	1	2	2	王蓉
QSH-B27	2014-01-14	1	43	#NULL!	3	2	1	2	2	#NULL!	2	#NULL!	1	1	1	1	1	1	2	2	2	2	2	#NULL!	#NULL!	#NULL!	#NULL!	#NULL!	#NULL!	#NULL!	#NULL!	#NULL!	1	#NULL!	#NULL!	1	1	1	2	蔡丹桃
QSH-B29	2014-01-14	2	43	#NULL!	2	2	1	1	2	#NULL!	2	#NULL!	1	1	1	1	1	1	3	3	3	3	1	#NULL!	#NULL!	#NULL!	#NULL!	#NULL!	#NULL!	#NULL!	#NULL!	#NULL!	1	#NULL!	#NULL!	1	1	1	2	蔡丹桃
QSH-B47	2014-01-14	2	43	1	1	2	4	1	2	#NULL!	2	#NULL!	1	3	3	3	3	1	1	1	1	3	2	#NULL!	#NULL!	#NULL!	#NULL!	#NULL!	#NULL!	#NULL!	#NULL!	#NULL!	1	#NULL!	#NULL!	3	3	1	2	蔡丹桃
QYP-B59	2014-01-15	2	43	1	3	2	8	1	2	#NULL!	2	#NULL!	1	1	1	1	1	1	1	1	1	1	1	#NULL!	#NULL!	#NULL!	#NULL!	#NULL!	#NULL!	#NULL!	#NULL!	#NULL!	1	#NULL!	#NULL!	1	1	1	2	李洪玲
QYP-B71	2014-01-17	1	43	1	3	2	9	2	2	#NULL!	2	#NULL!	1	1	1	1	1	1	1	1	1	1	1	#NULL!	#NULL!	#NULL!	#NULL!	#NULL!	#NULL!	#NULL!	#NULL!	#NULL!	2	#NULL!	#NULL!	1	1	2	2	邓云兰
QYP-B75	2014-01-17	1	43	1	4	2	1	3	2	#NULL!	2	#NULL!	3	1	1	1	1	1	1	1	1	1	1	#NULL!	#NULL!	#NULL!	#NULL!	#NULL!	#NULL!	#NULL!	#NULL!	#NULL!	2	#NULL!	#NULL!	1	1	1	2	吴海亮
WL-B20	2014-01-14	1	43	1	3	2	1	2	2	#NULL!	2	#NULL!	2	1	1	3	3	1	3	1	2	3	2	#NULL!	#NULL!	#NULL!	#NULL!	#NULL!	#NULL!	#NULL!	#NULL!	#NULL!	2	#NULL!	#NULL!	3	3	2	2	饶裕莲
AYX-B46	2014-01-10	1	43	1	3	2	1	2	2	#NULL!	2	#NULL!	1	1	1	1	1	1	1	1	1	2	2	#NULL!	#NULL!	#NULL!	#NULL!	#NULL!	#NULL!	#NULL!	#NULL!	#NULL!	3	#NULL!	#NULL!	1	1	2	2	肖芸
306	2013-12-31	1	43	1	3	2	1	2	2	#NULL!	2	#NULL!	1	1	1	1	1	2	1	1	1	2	1	#NULL!	#NULL!	#NULL!	#NULL!	#NULL!	#NULL!	#NULL!	#NULL!	#NULL!	1	#NULL!	#NULL!	1	1	2	2	王斌
DH-B091	2014-01-14	2	43	1	1	2	7	1	2	#NULL!	1	1	1	1	1	1	1	1	2	3	1	1	2	2	2	2	2	#NULL!	2	2	1	2	2	2	1	1	2	2	2	龙强
DH-B092	2014-01-14	1	43	1	1	2	5	1	2	#NULL!	1	1	1	3	3	3	3	3	3	3	3	3	2	2	2	2	2	#NULL!	2	2	1	2	1	2	1	1	1	3	2	龙强
XH-B18	2014-01-14	2	43	1	2	2	1	1	2	#NULL!	1	1	1	1	1	1	3	1	1	1	1	3	2	2	2	1	1	1	2	1	1	1	1	1	4	1	1	2	2	胡玉成
XH-B38	2014-01-14	2	43	1	2	#NULL!	4	1	2	#NULL!	1	1	2	1	3	3	3	3	3	3	3	3	3	2	1	1	2	#NULL!	2	2	1	1	1	1	1	1	1	1	2	胡玉成
XH-B114	2014-01-12	1	43	1	4	2	5	3	2	#NULL!	1	1	1	1	1	1	1	1	1	1	1	2	2	1	1	1	1	2	1	2	1	2	2	1	1	1	1	2	2	兰彪
XH-B126	2014-01-12	2	43	1	2	2	4	1	2	#NULL!	1	1	1	1	1	1	1	1	1	1	1	1	2	2	2	2	2	#NULL!	2	2	2	2	1	1	1	1	1	2	2	兰彪
XH-B137	2014-01-13	1	43	1	3	2	1	1	2	#NULL!	1	1	1	1	1	1	1	1	1	1	1	2	1	2	2	2	1	1	2	2	1	1	2	1	2	1	1	2	2	叶松
XHQ-B175	2014-01-13	1	43	1	3	2	1	2	2	#NULL!	1	1	1	1	1	1	1	1	1	1	1	1	2	2	2	2	2	#NULL!	2	2	2	2	1	1	1	1	1	2	2	胡玉城
QSH-B42	2014-01-14	1	43	1	4	2	7	1	2	#NULL!	1	1	1	1	1	1	1	1	1	1	1	2	1	2	1	1	1	2	1	1	1	1	3	1	2	1	1	2	2	魏桂英
QSH-B54	2014-01-14	2	43	1	1	2	1	1	2	#NULL!	1	1	1	1	1	1	1	3	1	1	1	1	2	2	2	1	1	1	2	2	1	1	1	3	4	1	1	2	2	郭金
QYP-B96	2014-01-13	1	43	1	3	2	4	1	2	#NULL!	1	1	2	1	1	1	1	1	1	1	1	3	1	2	2	1	1	2	2	2	1	1	3	2	2	1	1	2	2	章文华
WL-B8	2014-01-14	1	43	1	3	2	1	2	2	#NULL!	1	1	1	1	1	1	1	2	2	2	2	2	3	2	2	2	1	2	1	1	1	2	2	1	1	1	3	2	2	饶裕莲
HGT-B22	2014-01-14	1	43	1	2	2	4	1	2	#NULL!	1	1	2	1	1	1	1	1	2	2	2	1	2	1	2	1	1	1	1	1	2	1	1	1	1	1	1	2	2	戚京城
XJ-B57	2014-01-14	2	43	1	2	2	4	1	2	#NULL!	1	1	1	1	1	1	1	3	3	3	3	3	3	1	1	1	2	#NULL!	2	2	1	2	2	2	2	1	3	3	2	陈丽华
XJX-B092	2014-01-14	2	43	1	3	2	4	2	2	#NULL!	1	1	2	1	1	1	1	1	1	1	1	1	3	2	2	2	1	1	2	2	1	2	4	1	1	1	1	2	2	涂中兴
DH-B45	2014-01-14	1	43	1	2	2	1	1	2	#NULL!	1	2	1	1	1	1	1	1	1	1	1	1	3	2	2	1	1	1	2	2	1	2	1	1	1	1	1	2	2	朱春芳
DH-B086	2014-01-14	1	43	1	3	1	5	2	2	#NULL!	1	2	1	1	1	1	1	1	1	1	1	1	1	2	2	1	1	1	2	2	1	1	1	1	1	1	1	2	2	龙强
XH-B62	2014-01-14	2	43	1	3	2	4	2	2	#NULL!	1	2	2	1	3	1	1	1	3	1	1	1	3	2	2	1	2	#NULL!	2	2	1	2	1	1	2	2	1	2	2	王蓉
QSH-B39	2014-01-14	2	43	#NULL!	#NULL!	2	7	1	2	#NULL!	1	2	1	1	1	2	2	1	1	1	1	2	1	2	1	1	1	2	2	1	1	1	3	1	1	1	1	2	2	蔡丹桃
XJ-B40	2014-01-14	2	43	1	2	#NULL!	1	2	#NULL!	#NULL!	1	2	2	1	1	1	1	1	1	1	1	1	3	2	2	2	1	1	2	2	1	2	2	2	2	1	1	2	2	凌荣明
QYP-B78	2014-01-17	2	43	1	2	2	4	1	2	#NULL!	1	3	2	1	1	1	1	1	1	1	1	1	2	1	1	1	1	2	1	2	1	1	2	1	1	1	1	2	2	张莉
XH-B154	2014-01-13	2	43	1	2	#NULL!	4	1	2	#NULL!	1	4	1	1	3	3	3	1	3	3	3	3	3	2	2	2	2	#NULL!	1	1	1	1	4	1	1	1	1	2	2	王蓉
QYP-B12	2014-01-14	2	44	1	3	2	5	3	2	#NULL!	2	#NULL!	3	1	1	1	1	1	1	1	1	1	1	#NULL!	#NULL!	#NULL!	#NULL!	#NULL!	#NULL!	#NULL!	#NULL!	#NULL!	3	#NULL!	#NULL!	1	1	1	2	吴海亮
QYP-B84	2014-01-12	2	44	1	2	2	7	1	2	#NULL!	2	#NULL!	1	1	2	1	1	1	1	1	1	1	2	#NULL!	#NULL!	#NULL!	#NULL!	#NULL!	#NULL!	#NULL!	#NULL!	#NULL!	3	#NULL!	#NULL!	1	1	2	2	周军华
QYP-B89	2014-01-12	2	44	1	1	2	1	2	2	#NULL!	2	#NULL!	1	1	1	1	1	1	1	1	1	1	1	#NULL!	#NULL!	#NULL!	#NULL!	#NULL!	#NULL!	#NULL!	#NULL!	#NULL!	1	#NULL!	#NULL!	1	1	2	2	周军华
WL-B12	2014-01-14	2	44	1	2	2	8	2	2	#NULL!	2	#NULL!	3	1	1	1	1	1	3	3	3	3	2	#NULL!	#NULL!	#NULL!	#NULL!	#NULL!	#NULL!	#NULL!	#NULL!	#NULL!	2	#NULL!	#NULL!	1	3	2	2	饶裕莲
WL-B21	2014-01-14	1	44	2	3	2	5	3	2	#NULL!	2	#NULL!	2	3	3	2	3	1	3	3	3	1	2	#NULL!	#NULL!	#NULL!	#NULL!	#NULL!	#NULL!	#NULL!	#NULL!	#NULL!	2	#NULL!	#NULL!	3	3	1	2	汪玮
WL-B24	2014-01-14	1	44	2	3	2	5	2	2	#NULL!	2	#NULL!	1	1	1	1	3	1	1	2	2	3	2	#NULL!	#NULL!	#NULL!	#NULL!	#NULL!	#NULL!	#NULL!	#NULL!	#NULL!	2	#NULL!	#NULL!	1	1	2	2	饶裕莲
WL-B25	2014-01-14	1	44	1	4	2	1	2	2	#NULL!	2	#NULL!	1	1	1	2	1	1	1	1	1	1	2	#NULL!	#NULL!	#NULL!	#NULL!	#NULL!	#NULL!	#NULL!	#NULL!	#NULL!	2	#NULL!	#NULL!	1	1	2	2	饶裕莲
WL-B37	2014-01-14	2	44	1	3	2	10	1	2	#NULL!	2	#NULL!	1	3	3	3	3	1	3	3	3	3	2	#NULL!	#NULL!	#NULL!	#NULL!	#NULL!	#NULL!	#NULL!	#NULL!	#NULL!	2	#NULL!	#NULL!	3	3	2	2	饶裕莲
HGT-B01	2014-01-14	1	44	1	3	2	1	1	2	#NULL!	2	#NULL!	1	1	1	1	1	3	2	2	2	2	2	#NULL!	#NULL!	#NULL!	#NULL!	#NULL!	#NULL!	#NULL!	#NULL!	#NULL!	2	#NULL!	#NULL!	1	1	1	2	戚京城
102	2013-12-30	1	44	1	3	1	1	2	2	#NULL!	2	#NULL!	1	2	1	3	1	2	2	2	2	1	2	#NULL!	#NULL!	#NULL!	#NULL!	#NULL!	#NULL!	#NULL!	#NULL!	#NULL!	4	#NULL!	#NULL!	2	2	2	2	郭双莉
DH-B103	2014-01-14	2	44	1	2	2	8	1	2	#NULL!	1	1	1	1	1	1	2	1	2	2	2	2	2	2	2	2	2	#NULL!	2	1	2	2	2	2	1	1	2	2	2	郭艳萍
XH-B098	2014-01-12	1	44	1	3	2	6	1	2	#NULL!	1	1	1	1	3	1	3	1	3	3	3	3	3	2	2	2	1	2	2	2	2	2	3	1	1	1	1	1	2	王蓉
XHQ-B169	2014-01-13	2	44	1	3	2	6	3	2	#NULL!	1	1	1	1	1	1	1	1	1	1	1	2	1	2	2	1	1	1	2	2	1	2	1	1	1	1	1	4	2	胡玉城
XHQ-B173	2014-01-13	2	44	#NULL!	3	2	1	3	2	#NULL!	1	1	1	1	1	1	1	1	1	1	1	1	2	2	2	2	2	#NULL!	2	2	2	2	1	1	1	1	1	2	2	兰彪
QYP-B106	2014-01-14	2	44	1	3	2	5	1	2	#NULL!	1	1	3	1	1	1	3	1	1	1	1	2	3	1	1	1	1	2	2	2	1	1	1	1	1	1	1	2	2	周军华
HGT-B16	2014-01-14	2	44	1	2	2	8	1	2	#NULL!	1	1	1	1	1	1	3	1	3	3	3	3	2	2	2	1	1	2	1	2	1	2	2	2	2	1	1	2	2	戚京城
XJ-B33	2014-01-14	1	44	1	3	2	1	2	2	#NULL!	1	1	1	1	1	1	1	1	1	1	1	1	3	2	2	2	1	1	2	2	2	2	2	1	2	1	1	1	2	陈丽华
AYX-B9	2014-01-10	1	44	1	3	2	1	2	2	#NULL!	1	1	2	3	1	1	1	1	3	3	1	2	2	2	2	1	1	2	2	2	2	2	3	1	1	1	1	1	2	李才火
402	2013-12-31	1	44	1	4	2	4	1	2	#NULL!	1	1	2	1	1	1	1	1	1	1	1	3	3	1	1	1	1	1	1	1	1	1	1	1	1	1	1	2	2	王斌
406	2013-12-31	2	44	1	5	2	4	1	2	#NULL!	1	1	2	1	1	1	1	1	1	1	1	3	3	1	1	1	1	2	2	2	1	1	1	1	2	1	1	2	2	王斌
DH-B21	2014-01-13	1	44	1	3	2	1	1	#NULL!	#NULL!	1	2	2	1	1	1	1	1	1	1	1	2	2	2	2	2	2	#NULL!	2	2	2	1	3	1	1	1	1	2	2	朱春芳
DH-B22	2014-01-13	2	44	1	2	2	8	3	2	#NULL!	1	2	1	1	1	3	1	1	1	1	1	3	2	2	2	2	1	1	2	2	2	2	1	1	1	1	1	2	2	朱春芳
XH-B03	2014-01-14	2	44	1	3	2	1	2	2	#NULL!	1	2	1	1	1	1	3	1	3	3	3	3	3	2	2	1	1	1	2	1	2	2	4	1	4	1	1	2	2	叶松
XJ-B38	2014-01-14	1	44	1	2	2	1	2	2	#NULL!	1	2	2	1	1	1	1	1	1	1	1	1	3	2	2	2	1	1	2	2	1	2	1	2	2	1	1	2	2	凌荣明
XJX-B081	2014-01-14	1	44	1	3	2	1	2	3	#NULL!	1	2	2	1	3	1	1	1	1	1	1	1	3	2	2	2	1	2	2	2	1	2	3	1	2	1	1	2	2	涂中兴
XJX-B138	2014-01-14	1	44	1	4	2	9	1	2	#NULL!	1	2	1	1	1	1	1	1	1	1	1	1	3	2	2	2	1	2	2	2	1	2	2	2	2	1	1	2	2	涂中兴
XJ-B39	2014-01-14	2	44	1	3	2	1	3	2	#NULL!	1	3	1	1	1	1	1	3	3	3	3	2	2	1	2	2	1	1	2	2	1	2	4	1	2	1	3	3	2	陈丽华
XH-B04	2014-01-14	2	44	1	2	2	5	1	2	#NULL!	1	4	3	3	1	1	1	3	3	3	3	3	3	2	2	1	1	1	1	2	1	2	4	1	1	1	1	1	2	叶松
115	2013-12-30	2	44	1	1	2	1	4	2	#NULL!	1	4	1	3	1	2	1	3	3	2	2	2	3	2	2	2	2	#NULL!	1	2	1	1	3	3	1	1	1	2	2	郭双莉
DH-B16	2014-01-13	1	45	1	2	2	6	2	2	#NULL!	2	#NULL!	1	1	1	1	1	1	2	2	2	2	2	#NULL!	#NULL!	#NULL!	#NULL!	#NULL!	#NULL!	#NULL!	#NULL!	#NULL!	1	#NULL!	#NULL!	1	1	1	2	朱春芳
DH-B40	2014-01-14	1	45	1	2	2	6	1	#NULL!	#NULL!	2	#NULL!	2	1	1	1	1	1	1	1	1	1	3	#NULL!	#NULL!	#NULL!	#NULL!	#NULL!	#NULL!	#NULL!	#NULL!	#NULL!	2	#NULL!	#NULL!	1	1	2	2	朱春芳
DH-B46	2014-01-14	1	45	1	2	2	5	1	2	#NULL!	2	#NULL!	2	1	1	1	1	1	1	1	1	1	2	#NULL!	#NULL!	#NULL!	#NULL!	#NULL!	#NULL!	#NULL!	#NULL!	#NULL!	1	#NULL!	#NULL!	1	1	2	2	朱春芳
DH-B61	2014-01-14	2	45	1	3	2	4	1	2	#NULL!	2	#NULL!	2	1	1	1	1	1	1	1	1	1	3	#NULL!	#NULL!	#NULL!	#NULL!	#NULL!	#NULL!	#NULL!	#NULL!	#NULL!	1	#NULL!	#NULL!	1	1	2	2	龙强
DH-B64	2014-01-14	2	45	1	1	2	4	1	2	#NULL!	2	#NULL!	2	1	1	1	1	1	3	3	3	3	3	#NULL!	#NULL!	#NULL!	#NULL!	#NULL!	#NULL!	#NULL!	#NULL!	#NULL!	1	#NULL!	#NULL!	1	1	2	2	龙强
DH-B71	2014-01-14	2	45	1	1	2	1	1	2	#NULL!	2	#NULL!	2	1	1	1	1	1	1	1	1	3	3	#NULL!	#NULL!	#NULL!	#NULL!	#NULL!	#NULL!	#NULL!	#NULL!	#NULL!	1	#NULL!	#NULL!	1	1	2	2	龙强
DH-B087	2014-01-14	2	45	1	3	2	4	1	2	#NULL!	2	#NULL!	1	1	1	1	1	1	1	3	1	3	3	#NULL!	#NULL!	#NULL!	#NULL!	#NULL!	#NULL!	#NULL!	#NULL!	#NULL!	1	#NULL!	#NULL!	1	1	2	2	龙强
DH-B089	2014-01-14	2	45	1	2	2	8	1	2	#NULL!	2	#NULL!	1	1	1	1	1	1	2	2	2	2	2	#NULL!	#NULL!	#NULL!	#NULL!	#NULL!	#NULL!	#NULL!	#NULL!	#NULL!	3	#NULL!	#NULL!	1	2	2	2	龙强
DH-B110	2014-01-14	1	45	1	2	2	1	1	2	#NULL!	2	#NULL!	2	1	1	1	1	1	1	1	1	1	3	#NULL!	#NULL!	#NULL!	#NULL!	#NULL!	#NULL!	#NULL!	#NULL!	#NULL!	1	#NULL!	#NULL!	1	1	2	2	郭艳萍
DH-B122	2014-01-12	2	45	1	2	2	1	1	2	#NULL!	2	#NULL!	1	3	1	3	1	1	1	1	1	3	3	#NULL!	#NULL!	#NULL!	#NULL!	#NULL!	#NULL!	#NULL!	#NULL!	#NULL!	1	#NULL!	#NULL!	1	1	2	2	郭艳萍
XH-B63	2014-01-14	2	45	1	3	#NULL!	4	2	2	#NULL!	2	#NULL!	1	1	3	1	3	1	1	1	1	1	1	#NULL!	#NULL!	#NULL!	#NULL!	#NULL!	#NULL!	#NULL!	#NULL!	#NULL!	1	#NULL!	#NULL!	1	1	4	2	叶松
QSH-B5	2014-01-12	1	45	1	3	2	8	1	2	#NULL!	2	#NULL!	3	2	1	1	1	1	1	1	1	3	2	#NULL!	#NULL!	#NULL!	#NULL!	#NULL!	#NULL!	#NULL!	#NULL!	#NULL!	2	#NULL!	#NULL!	1	1	2	2	蔡丹桃
QYP-B13	2014-01-14	2	45	1	1	#NULL!	8	2	2	#NULL!	2	#NULL!	2	1	1	1	1	1	1	1	1	1	1	#NULL!	#NULL!	#NULL!	#NULL!	#NULL!	#NULL!	#NULL!	#NULL!	#NULL!	3	#NULL!	#NULL!	1	1	1	2	吴海亮
QYP-B24	2014-01-14	2	45	1	4	2	1	2	1	2	2	#NULL!	2	1	3	1	1	1	2	2	2	2	2	#NULL!	#NULL!	#NULL!	#NULL!	#NULL!	#NULL!	#NULL!	#NULL!	#NULL!	4	#NULL!	#NULL!	1	3	3	2	周军华
QYP-B27	2014-01-14	2	45	1	1	2	1	3	2	#NULL!	2	#NULL!	3	1	1	1	1	1	1	1	1	1	1	#NULL!	#NULL!	#NULL!	#NULL!	#NULL!	#NULL!	#NULL!	#NULL!	#NULL!	1	#NULL!	#NULL!	1	1	4	2	章文华
QYP-B33	2014-01-14	1	45	1	2	2	1	1	2	#NULL!	2	#NULL!	#NULL!	1	1	1	1	1	1	1	1	1	1	#NULL!	#NULL!	#NULL!	#NULL!	#NULL!	#NULL!	#NULL!	#NULL!	#NULL!	2	#NULL!	#NULL!	1	1	2	2	周军华
QYP-B67	2014-01-17	2	45	1	3	2	1	2	2	#NULL!	2	#NULL!	3	1	1	1	1	1	1	1	1	1	1	#NULL!	#NULL!	#NULL!	#NULL!	#NULL!	#NULL!	#NULL!	#NULL!	#NULL!	3	#NULL!	#NULL!	1	1	2	2	吴海亮
QYP-B98	2014-01-13	2	45	1	2	2	5	2	2	#NULL!	2	#NULL!	1	1	1	1	1	1	1	1	1	1	1	#NULL!	#NULL!	#NULL!	#NULL!	#NULL!	#NULL!	#NULL!	#NULL!	#NULL!	2	#NULL!	#NULL!	1	1	2	2	吴海亮
QYP-B105	2014-01-14	2	45	1	1	2	4	1	2	#NULL!	2	#NULL!	1	1	1	1	1	1	1	1	1	1	1	#NULL!	#NULL!	#NULL!	#NULL!	#NULL!	#NULL!	#NULL!	#NULL!	#NULL!	1	#NULL!	#NULL!	1	1	2	2	吴海亮
QYP-B107	2014-01-14	2	45	1	2	2	6	2	2	#NULL!	2	#NULL!	1	1	1	1	1	1	1	1	1	1	2	#NULL!	#NULL!	#NULL!	#NULL!	#NULL!	#NULL!	#NULL!	#NULL!	#NULL!	1	#NULL!	#NULL!	1	1	2	2	吴海亮
WL-B29	2014-01-14	2	45	1	3	2	4	3	2	#NULL!	2	#NULL!	2	1	1	3	1	1	3	3	2	2	2	#NULL!	#NULL!	#NULL!	#NULL!	#NULL!	#NULL!	#NULL!	#NULL!	#NULL!	2	#NULL!	#NULL!	3	3	2	2	汪玮
AYX-B13	2014-01-10	1	45	1	3	2	1	2	2	#NULL!	2	#NULL!	1	1	1	1	1	1	1	1	1	2	2	#NULL!	#NULL!	#NULL!	#NULL!	#NULL!	#NULL!	#NULL!	#NULL!	#NULL!	3	#NULL!	#NULL!	1	1	2	2	肖芸
AYX-B16	2014-01-10	2	45	1	3	2	1	1	2	#NULL!	2	#NULL!	1	1	1	1	1	1	1	1	1	1	2	#NULL!	#NULL!	#NULL!	#NULL!	#NULL!	#NULL!	#NULL!	#NULL!	#NULL!	3	#NULL!	#NULL!	1	1	2	2	肖芸
AYX-B28	2014-01-10	2	45	1	2	2	1	2	2	#NULL!	2	#NULL!	1	3	3	3	3	1	3	3	3	3	3	#NULL!	#NULL!	#NULL!	#NULL!	#NULL!	#NULL!	#NULL!	#NULL!	#NULL!	2	#NULL!	#NULL!	1	1	1	2	李才火
AYX-B43	2014-01-13	1	45	1	2	1	8	1	2	#NULL!	2	#NULL!	3	1	1	1	1	1	1	1	1	2	2	#NULL!	#NULL!	#NULL!	#NULL!	#NULL!	#NULL!	#NULL!	#NULL!	#NULL!	3	#NULL!	#NULL!	1	1	2	2	杨昌林
AYX-B48	2014-01-10	1	45	1	2	2	7	2	2	#NULL!	2	#NULL!	1	2	1	1	3	1	2	2	2	2	2	#NULL!	#NULL!	#NULL!	#NULL!	#NULL!	#NULL!	#NULL!	#NULL!	#NULL!	2	#NULL!	#NULL!	3	1	4	2	李才火
304	2013-12-31	2	45	1	3	#NULL!	8	2	#NULL!	#NULL!	2	#NULL!	#NULL!	1	1	1	1	1	3	1	1	3	1	#NULL!	#NULL!	#NULL!	#NULL!	#NULL!	#NULL!	#NULL!	#NULL!	#NULL!	2	#NULL!	#NULL!	1	1	1	2	王斌
309	2013-12-31	2	45	1	2	2	5	3	2	#NULL!	2	#NULL!	3	3	1	1	1	1	1	1	3	3	1	#NULL!	#NULL!	#NULL!	#NULL!	#NULL!	#NULL!	#NULL!	#NULL!	#NULL!	4	#NULL!	#NULL!	1	1	3	2	王斌
XH-B102	2014-01-12	2	45	1	2	2	10	1	2	#NULL!	1	1	2	1	2	2	2	1	1	2	1	2	2	2	2	2	2	#NULL!	2	2	2	2	4	1	1	1	1	2	2	王蓉
XH-B111	2014-01-12	1	45	1	3	2	1	2	2	#NULL!	1	1	1	1	3	3	3	3	3	3	3	3	3	2	2	2	2	#NULL!	2	2	2	2	4	1	1	1	1	2	2	兰彪
XH-B135	2014-01-13	1	45	1	2	2	9	1	1	1	1	1	1	3	3	3	3	3	3	3	3	3	3	2	2	1	1	1	2	2	1	2	2	1	1	1	3	2	2	叶松
XHQ-B177	2014-01-13	1	45	#NULL!	3	2	6	2	2	#NULL!	1	1	1	1	1	1	1	1	1	1	1	2	2	2	2	2	2	#NULL!	2	2	2	2	2	1	1	1	1	4	2	胡玉城
QSH-B9	2014-01-12	2	45	1	2	2	8	1	2	#NULL!	1	1	3	1	1	1	1	1	2	2	2	2	1	1	1	1	1	2	1	1	1	1	3	1	2	1	1	2	2	蔡丹桃
QSH-B18	2014-01-13	2	45	#NULL!	2	2	6	2	2	#NULL!	1	1	2	1	1	1	1	1	1	1	1	3	3	1	1	1	1	1	1	1	1	1	1	1	1	1	1	1	2	蔡丹桃
QYP-B52	2014-01-15	2	45	1	2	2	8	1	2	#NULL!	1	1	1	1	1	1	1	1	1	1	1	1	1	2	2	2	1	1	2	2	1	2	1	2	2	1	1	2	2	李洪玲
XJ-B55	2014-01-14	1	45	1	3	1	6	1	2	#NULL!	1	1	2	1	1	1	1	3	3	3	3	2	3	1	1	1	2	#NULL!	2	2	1	2	2	2	2	1	3	3	2	涂中兴
XJX-B113	2014-01-14	1	45	3	2	2	8	#NULL!	2	#NULL!	1	1	2	1	1	1	1	1	1	1	1	1	2	2	2	2	1	2	2	2	2	2	1	1	2	1	1	2	2	涂中兴
XJX-B136	2014-01-14	1	45	1	3	2	7	2	2	#NULL!	1	1	1	1	1	1	1	1	1	1	1	1	2	2	2	2	1	1	2	2	1	2	2	1	2	1	1	2	2	涂中兴
62	2013-12-29	1	45	1	2	1	1	3	1	2	1	1	1	2	1	2	1	2	2	2	2	2	2	1	1	1	1	1	1	2	1	1	2	1	1	1	1	2	2	郭双莉
205	2013-12-30	1	45	1	3	2	1	3	2	#NULL!	1	1	1	2	2	2	2	2	2	2	2	2	2	1	2	1	2	#NULL!	1	2	1	2	2	1	1	2	2	2	1	彭时辉
308	2013-12-31	2	45	1	3	2	4	2	2	#NULL!	1	1	3	1	1	1	1	1	2	2	2	2	1	1	1	1	1	1	1	1	1	1	4	1	1	1	1	1	2	彭时辉
DH-B32	2014-01-14	2	45	1	3	2	9	2	2	#NULL!	1	2	2	1	1	1	1	1	1	1	1	3	3	2	2	1	1	1	2	2	1	2	1	1	2	1	1	2	2	朱春芳
DH-B44	2014-01-14	1	45	1	4	2	4	3	2	#NULL!	1	2	2	1	1	1	1	1	1	1	1	1	3	2	2	1	1	1	2	2	1	2	1	1	2	1	1	2	2	朱春芳
DH-B096	2014-01-14	1	45	1	1	2	5	#NULL!	2	#NULL!	1	2	1	1	1	1	1	1	2	2	2	2	2	2	2	2	2	#NULL!	2	2	1	2	2	1	1	1	1	3	2	龙强
XH-B094	2014-01-12	1	45	1	2	2	6	1	2	#NULL!	1	2	2	1	1	3	3	3	3	3	3	3	3	1	1	1	1	1	2	2	1	2	1	1	1	1	1	2	2	叶松
XHQ-B176	2014-01-13	2	45	#NULL!	2	#NULL!	1	2	2	#NULL!	1	2	1	1	1	1	1	1	1	1	1	2	2	2	2	2	2	#NULL!	2	2	2	2	1	1	1	1	1	2	2	兰彪
QSH-B2	2014-01-12	2	45	1	2	1	7	3	2	#NULL!	1	2	1	3	1	1	3	2	1	1	1	1	1	1	2	1	1	1	1	1	1	1	1	1	2	1	1	1	2	蔡丹桃
XJX-B090	2014-01-14	1	45	1	3	2	8	2	2	#NULL!	1	2	1	1	1	1	1	1	1	1	1	1	3	2	2	2	1	1	2	2	1	2	2	1	2	1	1	1	2	涂中兴
XJX-B098	2014-01-14	2	45	1	3	2	9	2	2	#NULL!	1	2	1	1	1	1	1	1	1	1	1	1	3	2	2	2	1	2	2	2	1	2	2	1	2	1	1	2	2	涂中兴
XJX-B108	2014-01-14	2	45	1	2	2	7	1	2	#NULL!	1	2	2	1	1	1	1	1	1	1	1	1	3	2	2	2	1	1	2	2	2	2	4	1	2	1	1	1	2	涂中兴
XJ-B48	2014-01-14	1	45	1	3	2	1	3	2	#NULL!	1	3	2	1	1	1	1	3	3	3	3	3	2	1	2	2	1	1	2	2	1	2	2	2	2	1	3	3	2	陈丽华
QYP-B72	2014-01-17	2	45	1	4	2	4	3	2	#NULL!	1	4	1	1	1	1	1	1	2	2	2	2	2	2	2	2	2	#NULL!	2	2	2	2	1	1	1	1	1	2	2	邓云兰
XHQ-B182	2014-01-13	1	46	1	3	#NULL!	7	2	2	#NULL!	2	#NULL!	1	1	1	1	1	1	1	1	1	2	1	#NULL!	#NULL!	#NULL!	#NULL!	#NULL!	#NULL!	#NULL!	#NULL!	#NULL!	1	#NULL!	#NULL!	1	1	2	2	兰彪
QSH-B33	2014-01-14	2	46	#NULL!	1	2	4	1	2	#NULL!	2	#NULL!	1	2	1	3	3	3	3	3	3	2	3	#NULL!	#NULL!	#NULL!	#NULL!	#NULL!	#NULL!	#NULL!	#NULL!	#NULL!	2	#NULL!	#NULL!	1	1	1	2	蔡丹桃
QSH-B59	2014-01-14	2	46	1	2	2	7	2	2	#NULL!	2	#NULL!	2	1	1	1	1	1	3	3	3	3	2	#NULL!	#NULL!	#NULL!	#NULL!	#NULL!	#NULL!	#NULL!	#NULL!	#NULL!	2	#NULL!	#NULL!	1	1	2	2	魏桂英
WL-B10	2014-01-14	2	46	1	2	2	1	2	2	#NULL!	2	#NULL!	1	3	3	3	3	3	3	3	3	3	3	#NULL!	#NULL!	#NULL!	#NULL!	#NULL!	#NULL!	#NULL!	#NULL!	#NULL!	1	#NULL!	#NULL!	3	3	2	2	饶裕莲
AYX-B11	2014-01-10	2	46	1	2	2	1	2	2	#NULL!	2	#NULL!	3	1	1	1	1	1	1	1	1	1	2	#NULL!	#NULL!	#NULL!	#NULL!	#NULL!	#NULL!	#NULL!	#NULL!	#NULL!	2	#NULL!	#NULL!	1	1	2	2	杨昌林
AYX-B35	2014-01-10	1	46	1	3	2	1	2	2	#NULL!	2	#NULL!	1	3	1	1	1	1	3	3	3	3	2	#NULL!	#NULL!	#NULL!	#NULL!	#NULL!	#NULL!	#NULL!	#NULL!	#NULL!	3	#NULL!	#NULL!	3	2	1	2	李才火
10	2013-12-30	2	46	1	2	2	1	3	1	1	2	#NULL!	#NULL!	1	1	1	1	1	3	2	2	2	3	#NULL!	#NULL!	#NULL!	#NULL!	#NULL!	#NULL!	#NULL!	#NULL!	#NULL!	2	#NULL!	#NULL!	1	1	2	2	郭双莉
DH-B104	2014-01-14	1	46	1	2	2	8	1	2	#NULL!	1	1	1	1	1	1	2	2	2	2	2	2	2	2	2	2	2	#NULL!	2	1	2	2	2	1	1	1	1	2	2	郭艳萍
DH-B118	2014-01-12	2	46	1	2	2	6	1	2	#NULL!	1	1	1	1	1	1	1	1	2	2	2	2	2	2	2	2	2	#NULL!	2	2	2	2	2	1	1	1	1	2	2	郭艳萍
XH-B08	2014-01-14	2	46	1	3	2	1	2	2	#NULL!	1	1	2	3	3	3	1	1	3	3	3	3	3	2	1	2	2	#NULL!	2	2	1	2	1	1	1	1	1	2	2	叶松
XH-B110	2014-01-12	1	46	1	3	2	9	1	2	#NULL!	1	1	2	1	1	1	1	1	1	1	1	2	3	2	2	2	2	#NULL!	2	2	2	2	2	1	1	1	1	2	2	胡玉城
XH-B150	2014-01-13	1	46	1	2	#NULL!	1	1	2	#NULL!	1	1	2	1	3	3	3	1	3	3	3	3	3	2	2	2	2	#NULL!	2	2	2	2	2	1	1	1	1	4	2	王蓉
QSH-B15	2014-01-13	2	46	1	2	2	1	1	2	#NULL!	1	1	1	2	2	1	2	1	2	2	2	2	2	2	2	2	1	2	2	2	1	2	3	3	1	2	1	2	2	蔡丹桃
QYP-B39	2014-01-14	1	46	1	3	2	5	2	2	#NULL!	1	1	2	1	1	1	1	1	1	1	1	2	2	2	1	1	1	2	1	2	2	1	3	1	1	1	1	1	2	周军华
HGT-B19	2014-01-14	1	46	1	3	2	9	2	2	#NULL!	1	1	1	3	1	1	1	1	3	3	3	3	2	2	2	2	1	2	1	1	1	2	2	2	2	1	1	2	2	戚京城
XJ-B58	2014-01-14	1	46	1	3	2	8	1	2	#NULL!	1	1	2	1	1	1	1	3	3	3	3	2	3	1	1	1	1	1	2	2	1	2	2	2	2	1	3	3	2	涂中兴
213	2013-12-30	2	46	1	3	1	1	2	2	#NULL!	1	1	1	2	1	1	1	2	2	2	2	2	2	1	1	1	2	#NULL!	1	2	1	2	2	1	2	1	1	2	2	彭时辉
DH-B35	2014-01-14	2	46	1	3	2	9	1	2	#NULL!	1	2	2	1	1	1	1	1	1	1	1	1	3	2	2	1	1	1	2	2	2	2	1	1	2	1	1	2	2	朱春芳
DH-B097	2014-01-14	1	46	1	3	2	4	1	2	#NULL!	1	2	1	1	1	1	1	1	1	1	1	1	2	2	2	2	2	#NULL!	2	2	2	2	3	2	1	1	2	1	2	龙强
DH-B128	2014-01-13	2	46	1	2	2	1	1	2	#NULL!	1	2	2	1	1	1	1	1	1	1	1	1	1	2	2	1	1	1	2	2	1	2	1	1	1	1	1	2	2	郭艳萍
DH-B138	2014-01-14	2	46	1	1	2	8	1	2	#NULL!	1	2	1	1	1	1	1	1	1	1	1	1	3	2	2	1	1	1	2	2	1	2	1	2	1	1	1	2	2	郭艳萍
212	2013-12-30	2	46	1	3	1	1	2	1	1	1	2	1	1	3	1	1	2	2	2	2	2	2	1	1	1	1	1	1	1	1	2	2	4	1	2	3	2	2	彭时辉
XH-B134	2014-01-12	2	46	1	3	2	4	2	2	#NULL!	1	4	1	1	1	1	1	1	1	1	1	1	1	2	2	2	2	#NULL!	2	2	2	2	4	1	1	1	1	2	2	胡玉城
XH-B155	2014-01-13	2	46	1	3	#NULL!	5	1	2	#NULL!	1	4	2	1	3	1	3	1	3	3	3	3	3	2	2	2	2	#NULL!	2	2	2	2	1	1	4	1	1	2	2	王蓉
QSH-B3	2014-01-12	1	46	1	2	2	7	1	2	#NULL!	1	4	3	1	1	1	1	1	1	1	1	1	2	2	2	1	1	2	2	2	1	2	3	1	4	1	1	2	2	蔡丹桃
QYP-B7	2014-01-14	1	46	1	2	2	5	3	2	#NULL!	1	4	1	1	1	1	1	1	1	1	1	2	1	2	2	2	2	#NULL!	2	2	2	2	2	1	2	1	1	2	2	邓云兰
DH-B31	2014-01-14	2	47	1	3	2	5	1	2	#NULL!	2	#NULL!	2	1	1	1	1	1	1	1	1	2	3	#NULL!	#NULL!	#NULL!	#NULL!	#NULL!	#NULL!	#NULL!	#NULL!	#NULL!	2	#NULL!	#NULL!	1	1	2	2	朱春芳
DH-B33	2014-01-14	2	47	1	1	#NULL!	4	1	2	#NULL!	2	#NULL!	2	1	1	1	1	1	1	1	1	3	3	#NULL!	#NULL!	#NULL!	#NULL!	#NULL!	#NULL!	#NULL!	#NULL!	#NULL!	2	#NULL!	#NULL!	1	1	2	2	朱春芳
DH-B36	2014-01-14	2	47	1	2	2	6	1	2	#NULL!	2	#NULL!	2	1	1	1	1	1	1	1	1	3	3	#NULL!	#NULL!	#NULL!	#NULL!	#NULL!	#NULL!	#NULL!	#NULL!	#NULL!	1	#NULL!	#NULL!	2	2	2	2	朱春芳
DH-B41	2014-01-14	1	47	1	2	2	4	1	#NULL!	#NULL!	2	#NULL!	2	1	1	1	1	1	1	1	1	1	2	#NULL!	#NULL!	#NULL!	#NULL!	#NULL!	#NULL!	#NULL!	#NULL!	#NULL!	1	#NULL!	#NULL!	1	1	2	2	朱春芳
DH-B70	2014-01-14	2	47	1	2	2	4	1	2	#NULL!	2	#NULL!	2	1	1	1	1	1	1	1	1	2	3	#NULL!	#NULL!	#NULL!	#NULL!	#NULL!	#NULL!	#NULL!	#NULL!	#NULL!	2	#NULL!	#NULL!	1	1	2	2	龙强
DH-B135	2014-01-14	1	47	1	2	2	5	1	2	#NULL!	2	#NULL!	2	1	1	1	1	1	1	1	1	1	1	#NULL!	#NULL!	#NULL!	#NULL!	#NULL!	#NULL!	#NULL!	#NULL!	#NULL!	1	#NULL!	#NULL!	1	1	2	2	郭艳萍
DH-B136	2014-01-14	2	47	1	2	2	5	1	2	#NULL!	2	#NULL!	1	1	1	1	1	1	1	1	1	3	3	#NULL!	#NULL!	#NULL!	#NULL!	#NULL!	#NULL!	#NULL!	#NULL!	#NULL!	1	#NULL!	#NULL!	1	1	2	2	郭艳萍
DH-B143	2014-01-14	2	47	1	2	2	5	1	2	#NULL!	2	#NULL!	2	1	1	1	1	1	1	1	1	3	3	#NULL!	#NULL!	#NULL!	#NULL!	#NULL!	#NULL!	#NULL!	#NULL!	#NULL!	1	#NULL!	#NULL!	1	1	2	2	郭艳萍
XH-B58	2014-01-14	1	47	1	4	2	5	7	2	#NULL!	2	#NULL!	1	1	3	1	1	1	1	1	1	1	2	#NULL!	#NULL!	#NULL!	#NULL!	#NULL!	#NULL!	#NULL!	#NULL!	#NULL!	1	#NULL!	#NULL!	1	1	2	2	龙强
XH-B153	2014-01-13	2	47	1	1	#NULL!	4	1	2	#NULL!	2	#NULL!	1	3	3	3	3	3	3	3	3	3	3	#NULL!	#NULL!	#NULL!	#NULL!	#NULL!	#NULL!	#NULL!	#NULL!	#NULL!	1	#NULL!	#NULL!	1	1	1	2	王蓉
XHQ-B181	2014-01-13	1	47	1	3	#NULL!	1	3	2	#NULL!	2	#NULL!	1	1	1	1	1	1	1	1	1	2	2	#NULL!	#NULL!	#NULL!	#NULL!	#NULL!	#NULL!	#NULL!	#NULL!	#NULL!	1	#NULL!	#NULL!	3	1	2	2	兰彪
QYP-B35	2014-01-14	2	47	1	2	2	4	2	2	#NULL!	2	#NULL!	#NULL!	1	1	1	1	1	1	1	1	1	1	#NULL!	#NULL!	#NULL!	#NULL!	#NULL!	#NULL!	#NULL!	#NULL!	#NULL!	2	#NULL!	#NULL!	1	1	2	2	章文华
QYP-B58	2014-01-15	2	47	1	1	2	4	1	2	#NULL!	2	#NULL!	1	1	1	1	1	1	1	1	1	1	1	#NULL!	#NULL!	#NULL!	#NULL!	#NULL!	#NULL!	#NULL!	#NULL!	#NULL!	1	#NULL!	#NULL!	1	1	1	2	李洪玲
QYP-B76	2014-01-17	2	47	1	3	2	4	1	2	#NULL!	2	#NULL!	1	1	1	1	1	1	1	1	1	1	1	#NULL!	#NULL!	#NULL!	#NULL!	#NULL!	#NULL!	#NULL!	#NULL!	#NULL!	1	#NULL!	#NULL!	1	1	2	2	李洪玲
QYP-B85	2014-01-12	2	47	1	2	2	4	1	2	#NULL!	2	#NULL!	1	1	1	1	1	1	1	1	1	1	2	#NULL!	#NULL!	#NULL!	#NULL!	#NULL!	#NULL!	#NULL!	#NULL!	#NULL!	3	#NULL!	#NULL!	1	1	4	2	李洪玲
WL-B19	2014-01-14	2	47	1	3	2	1	1	2	#NULL!	2	#NULL!	2	1	1	1	1	1	3	3	3	3	3	#NULL!	#NULL!	#NULL!	#NULL!	#NULL!	#NULL!	#NULL!	#NULL!	#NULL!	2	#NULL!	#NULL!	3	3	4	2	肖超广
120	2013-12-30	2	47	1	1	2	3	3	2	#NULL!	2	#NULL!	#NULL!	2	1	1	1	2	2	2	2	2	2	#NULL!	#NULL!	#NULL!	#NULL!	#NULL!	#NULL!	#NULL!	#NULL!	#NULL!	4	#NULL!	#NULL!	1	1	2	2	肖超广
127	2013-12-30	2	47	1	3	1	3	1	2	#NULL!	2	#NULL!	#NULL!	3	1	3	1	1	2	2	1	1	2	#NULL!	#NULL!	#NULL!	#NULL!	#NULL!	#NULL!	#NULL!	#NULL!	#NULL!	3	#NULL!	#NULL!	1	1	1	2	郭双莉
66	2013-12-29	2	47	#NULL!	2	2	1	1	2	#NULL!	2	#NULL!	1	2	1	1	1	3	2	2	2	2	2	#NULL!	#NULL!	#NULL!	#NULL!	#NULL!	#NULL!	#NULL!	#NULL!	#NULL!	2	#NULL!	#NULL!	1	1	2	2	郭双莉
229	2013-12-30	1	47	1	2	2	1	1	2	#NULL!	2	#NULL!	1	3	3	3	3	3	3	3	3	3	3	#NULL!	#NULL!	#NULL!	#NULL!	#NULL!	#NULL!	#NULL!	#NULL!	#NULL!	4	#NULL!	#NULL!	3	3	2	2	彭时辉
210	2013-12-30	2	47	1	3	2	1	3	2	#NULL!	2	#NULL!	1	3	3	3	3	3	3	3	3	3	3	#NULL!	#NULL!	#NULL!	#NULL!	#NULL!	#NULL!	#NULL!	#NULL!	#NULL!	2	#NULL!	#NULL!	3	3	2	2	彭时辉
417	2013-12-31	1	47	#NULL!	2	2	6	3	2	#NULL!	2	#NULL!	1	3	1	2	1	1	3	3	3	3	3	#NULL!	#NULL!	#NULL!	#NULL!	#NULL!	#NULL!	#NULL!	#NULL!	#NULL!	2	#NULL!	#NULL!	1	1	2	2	王斌
DH-B10	2014-01-12	1	47	1	4	2	6	2	2	#NULL!	1	1	1	1	2	1	3	1	2	2	2	1	2	1	2	2	1	#NULL!	2	2	2	2	1	1	2	1	1	2	2	朱春芳
XH-B44	2014-01-14	1	47	1	2	#NULL!	6	1	2	#NULL!	1	1	1	1	1	1	1	1	1	1	1	1	1	1	1	1	1	1	1	1	2	2	#NULL!	#NULL!	#NULL!	#NULL!	#NULL!	#NULL!	2	叶松
XH-B085	2014-01-13	2	47	1	1	2	1	1	2	#NULL!	1	1	1	3	3	3	3	3	3	3	3	3	3	2	2	1	1	1	2	2	1	2	1	1	1	1	1	2	2	叶松
XHQ-B179	2014-01-13	2	47	1	2	2	4	1	2	#NULL!	1	1	1	1	1	1	2	1	1	1	1	3	2	2	2	2	2	#NULL!	2	2	2	2	2	1	1	1	1	2	2	兰彪
QYP-B56	2014-01-15	2	47	1	1	2	4	1	2	#NULL!	1	1	2	1	1	1	1	1	1	1	1	1	1	2	2	1	1	2	2	2	1	2	2	1	1	1	1	1	2	李洪玲
WL-B39	2014-01-14	1	47	1	2	2	5	2	2	#NULL!	1	1	1	3	3	1	1	1	3	3	3	3	2	2	2	2	2	#NULL!	2	2	2	2	3	1	1	1	1	2	2	饶裕莲
XJ-B60	2014-01-14	1	47	1	3	2	5	1	2	#NULL!	1	1	2	1	1	1	1	3	3	3	3	3	3	1	1	1	2	#NULL!	2	2	1	1	2	2	2	1	3	3	2	涂中兴
XJ-B67	2014-01-14	1	47	1	3	2	6	1	2	#NULL!	1	1	1	1	1	1	1	3	2	3	3	3	3	1	1	1	2	#NULL!	2	2	1	2	1	2	2	1	3	3	2	谢玉庆
XJX-B084	2014-01-14	1	47	1	3	2	5	1	2	#NULL!	1	1	2	1	1	1	1	1	1	1	1	1	3	2	2	2	1	2	2	2	1	2	2	1	2	1	1	2	2	谢玉庆
217	2013-12-30	2	47	1	2	2	1	3	2	#NULL!	1	1	1	3	3	3	3	3	3	3	3	3	3	1	1	1	1	1	1	2	1	2	2	1	2	1	1	2	2	彭时辉
DH-B137	2014-01-14	2	47	1	3	2	10	1	2	#NULL!	1	2	1	1	1	1	1	1	1	1	1	1	2	2	2	1	2	#NULL!	2	2	2	2	1	1	1	1	1	2	2	郭艳萍
XH-B64	2014-01-14	2	47	1	3	2	4	2	2	#NULL!	1	2	1	3	3	1	1	1	1	1	1	2	3	2	2	1	1	1	2	2	1	2	1	1	1	1	1	4	2	叶松
XJX-B100	2014-01-14	1	47	1	3	2	8	3	2	#NULL!	1	2	1	1	1	1	1	1	1	1	1	1	3	2	2	2	1	#NULL!	2	2	1	2	2	1	2	1	1	2	2	涂中兴
230	2013-12-30	1	47	1	3	2	6	1	2	#NULL!	1	3	1	3	1	3	1	1	1	1	1	1	1	2	2	2	1	2	2	2	2	2	4	2	2	1	1	2	2	彭时辉
DH-B23	2014-01-13	2	47	1	2	2	4	2	2	#NULL!	1	4	#NULL!	1	1	1	1	1	1	1	1	1	2	2	2	2	2	#NULL!	2	2	1	2	4	2	1	1	1	2	2	朱春芳
XH-B148	2014-01-13	1	47	1	1	#NULL!	6	1	2	#NULL!	1	4	1	1	3	3	3	1	3	3	3	3	3	2	1	1	1	#NULL!	2	2	1	1	1	1	1	1	1	4	2	王蓉
128	2013-12-29	1	47	1	3	1	3	2	2	#NULL!	1	4	1	3	3	3	3	3	3	3	3	3	2	2	1	1	1	1	2	2	2	2	1	#NULL!	4	3	3	2	2	彭时辉
211	2013-12-30	2	47	1	2	1	1	4	2	#NULL!	1	4	1	2	1	1	1	3	3	3	3	3	3	1	1	1	2	#NULL!	1	2	1	2	4	1	2	3	3	2	2	彭时辉
DH-B12	2014-01-12	2	48	1	1	2	6	1	2	#NULL!	2	#NULL!	#NULL!	3	3	3	3	1	3	3	3	3	3	#NULL!	#NULL!	#NULL!	#NULL!	#NULL!	#NULL!	#NULL!	#NULL!	#NULL!	1	#NULL!	#NULL!	3	3	2	2	朱春芳
DH-B51	2014-01-14	2	48	1	2	2	5	1	2	#NULL!	2	#NULL!	1	1	1	1	1	1	1	1	1	2	3	#NULL!	#NULL!	#NULL!	#NULL!	#NULL!	#NULL!	#NULL!	#NULL!	#NULL!	1	#NULL!	#NULL!	1	1	2	2	朱春芳
DH-B53	2014-01-14	1	48	1	3	2	4	1	2	#NULL!	2	#NULL!	2	1	1	1	1	1	1	1	1	1	2	#NULL!	#NULL!	#NULL!	#NULL!	#NULL!	#NULL!	#NULL!	#NULL!	#NULL!	2	#NULL!	#NULL!	1	1	2	2	龙强
DH-B55	2014-01-14	1	48	1	4	2	5	1	2	#NULL!	2	#NULL!	1	1	1	1	1	1	1	1	1	1	3	#NULL!	#NULL!	#NULL!	#NULL!	#NULL!	#NULL!	#NULL!	#NULL!	#NULL!	4	#NULL!	#NULL!	1	1	2	2	龙强
DH-B60	2014-01-14	1	48	1	4	2	8	1	2	#NULL!	2	#NULL!	1	1	1	1	1	1	1	1	1	2	2	#NULL!	#NULL!	#NULL!	#NULL!	#NULL!	#NULL!	#NULL!	#NULL!	#NULL!	1	#NULL!	#NULL!	1	1	2	2	龙强
DH-B72	2014-01-14	1	48	1	2	2	4	1	2	#NULL!	2	#NULL!	2	1	1	1	1	1	1	1	1	3	3	#NULL!	#NULL!	#NULL!	#NULL!	#NULL!	#NULL!	#NULL!	#NULL!	#NULL!	1	#NULL!	#NULL!	1	1	2	2	龙强
DH-B129	2014-01-13	1	48	1	2	2	5	1	2	#NULL!	2	#NULL!	1	3	1	3	1	1	3	3	3	3	3	#NULL!	#NULL!	#NULL!	#NULL!	#NULL!	#NULL!	#NULL!	#NULL!	#NULL!	1	#NULL!	#NULL!	1	1	2	2	郭艳萍
DH-B133	2014-01-13	2	48	1	1	2	4	1	2	#NULL!	2	#NULL!	1	1	1	1	1	1	1	1	1	1	3	#NULL!	#NULL!	#NULL!	#NULL!	#NULL!	#NULL!	#NULL!	#NULL!	#NULL!	1	#NULL!	#NULL!	1	1	2	2	郭艳萍
XH-B56	2014-01-14	1	48	1	2	2	6	2	2	#NULL!	2	#NULL!	1	1	3	1	3	1	1	1	1	1	2	#NULL!	#NULL!	#NULL!	#NULL!	#NULL!	#NULL!	#NULL!	#NULL!	#NULL!	2	#NULL!	#NULL!	1	1	2	2	叶松
XH-B60	2014-01-14	2	48	1	3	2	6	2	2	#NULL!	2	#NULL!	1	1	1	1	1	1	1	1	1	2	2	#NULL!	#NULL!	#NULL!	#NULL!	#NULL!	#NULL!	#NULL!	#NULL!	#NULL!	1	#NULL!	#NULL!	3	3	4	2	叶松
XH-B74	2014-01-14	2	48	1	3	1	1	3	2	#NULL!	2	#NULL!	1	1	1	1	1	1	3	1	1	1	3	#NULL!	#NULL!	#NULL!	#NULL!	#NULL!	#NULL!	#NULL!	#NULL!	#NULL!	1	#NULL!	#NULL!	2	1	1	2	叶松
XH-B081	2014-01-10	1	48	1	2	2	4	3	3	#NULL!	2	#NULL!	1	1	1	1	1	1	1	1	1	3	1	#NULL!	#NULL!	#NULL!	#NULL!	#NULL!	#NULL!	#NULL!	#NULL!	#NULL!	1	#NULL!	#NULL!	1	1	4	2	兰彪
XH-B092	2014-01-12	2	48	1	2	2	4	1	2	#NULL!	1	#NULL!	#NULL!	1	1	1	1	1	1	1	1	1	3	2	1	1	1	1	1	2	1	2	1	1	1	1	1	2	2	叶松
QSH-B44	2014-01-14	2	48	1	3	2	5	2	2	#NULL!	2	#NULL!	2	1	1	1	1	1	1	1	1	3	1	#NULL!	#NULL!	#NULL!	#NULL!	#NULL!	#NULL!	#NULL!	#NULL!	#NULL!	2	#NULL!	#NULL!	1	1	1	2	蔡丹桃
QYP-B10	2014-01-14	2	48	1	4	2	5	2	2	#NULL!	2	#NULL!	3	1	1	1	1	1	1	1	1	1	1	#NULL!	#NULL!	#NULL!	#NULL!	#NULL!	#NULL!	#NULL!	#NULL!	#NULL!	3	#NULL!	#NULL!	1	1	4	2	吴海亮
QYP-B14	2014-01-14	1	48	1	3	2	5	3	2	#NULL!	2	#NULL!	3	1	1	1	1	1	1	1	1	1	1	#NULL!	#NULL!	#NULL!	#NULL!	#NULL!	#NULL!	#NULL!	#NULL!	#NULL!	2	#NULL!	#NULL!	1	1	2	2	吴海亮
WL-B13	2014-01-14	2	48	1	2	2	1	2	2	#NULL!	2	#NULL!	2	3	1	1	1	1	2	2	2	3	2	#NULL!	#NULL!	#NULL!	#NULL!	#NULL!	#NULL!	#NULL!	#NULL!	#NULL!	2	#NULL!	#NULL!	3	3	2	2	饶裕莲
XJX-B129	2014-01-14	2	48	1	2	2	1	3	2	#NULL!	2	#NULL!	1	1	1	1	1	1	1	1	1	1	1	#NULL!	#NULL!	#NULL!	#NULL!	#NULL!	#NULL!	#NULL!	#NULL!	#NULL!	1	#NULL!	#NULL!	1	1	2	2	涂中兴
301	2013-12-31	1	48	1	3	2	9	3	2	#NULL!	2	#NULL!	1	1	1	1	1	1	1	1	1	1	1	#NULL!	#NULL!	#NULL!	#NULL!	#NULL!	#NULL!	#NULL!	#NULL!	#NULL!	4	#NULL!	#NULL!	1	1	1	2	王斌
303	#NULL!	1	48	1	3	2	4	2	#NULL!	#NULL!	2	#NULL!	2	1	1	1	1	1	1	1	1	3	2	#NULL!	#NULL!	#NULL!	#NULL!	#NULL!	#NULL!	#NULL!	#NULL!	#NULL!	1	#NULL!	#NULL!	1	1	2	2	王斌
416	#NULL!	1	48	1	2	#NULL!	4	3	#NULL!	#NULL!	2	#NULL!	1	2	1	1	1	1	2	2	2	2	#NULL!	#NULL!	#NULL!	#NULL!	#NULL!	#NULL!	#NULL!	#NULL!	#NULL!	#NULL!	2	#NULL!	#NULL!	1	1	1	2	王斌
DH-B13	2014-01-12	2	48	1	3	2	1	1	2	#NULL!	1	1	1	1	#NULL!	#NULL!	1	2	2	2	2	2	#NULL!	2	2	1	1	#NULL!	2	2	2	2	3	2	#NULL!	1	1	2	2	朱春芳
DH-B107	2014-01-14	2	48	1	2	2	5	1	#NULL!	#NULL!	1	1	1	1	1	1	1	3	3	3	3	3	2	2	2	2	2	#NULL!	2	2	2	2	3	1	1	1	1	2	2	郭艳萍
DH-B117	2014-01-12	2	48	1	2	2	4	1	2	#NULL!	1	1	1	1	1	1	1	1	2	2	2	2	2	2	2	2	2	#NULL!	2	2	2	2	2	1	1	1	1	2	2	郭艳萍
XH-B13	2014-01-14	1	48	1	3	2	1	1	1	1	1	1	1	3	1	1	1	1	1	1	1	3	1	2	2	2	2	#NULL!	2	2	1	2	4	1	2	1	1	4	2	朱春芳
XH-B14	2014-01-14	2	48	1	1	2	9	1	2	#NULL!	1	1	1	3	1	1	1	3	1	1	3	3	1	2	2	1	1	2	1	2	2	2	1	1	2	1	1	4	2	朱春芳
XH-B082	2014-01-10	2	48	1	3	2	5	2	2	#NULL!	1	1	1	1	1	1	1	1	1	1	1	2	1	1	2	1	1	1	2	2	1	2	1	1	4	1	1	4	2	兰彪
XH-B116	2014-01-12	2	48	1	2	2	10	1	2	#NULL!	1	1	1	1	1	1	1	1	1	1	1	1	2	2	2	2	1	2	2	2	2	2	1	1	1	1	1	2	2	兰彪
XH-B127	2014-01-12	1	48	1	3	2	4	2	2	#NULL!	1	1	1	1	1	1	1	1	1	1	1	3	3	2	2	2	2	#NULL!	2	2	2	2	1	1	1	1	1	2	2	兰彪
XH-B130	2014-01-12	1	48	1	2	1	4	1	2	#NULL!	1	1	1	1	1	1	1	1	1	1	1	3	2	2	2	2	2	#NULL!	2	2	2	2	4	1	1	1	1	2	2	兰彪
QYP-B23	2014-01-14	2	48	1	1	2	4	2	2	#NULL!	1	1	2	1	2	1	1	1	3	3	3	2	2	2	2	2	2	#NULL!	2	2	2	2	1	2	2	1	1	2	2	章文华
QYP-B77	2014-01-17	1	48	1	2	2	10	1	2	#NULL!	1	1	1	2	1	1	2	#NULL!	#NULL!	#NULL!	#NULL!	#NULL!	#NULL!	#NULL!	#NULL!	#NULL!	#NULL!	#NULL!	#NULL!	#NULL!	#NULL!	#NULL!	#NULL!	#NULL!	#NULL!	#NULL!	#NULL!	#NULL!	2	李洪玲
QYP-B94	2014-01-13	2	48	1	3	2	8	2	2	#NULL!	1	1	2	1	1	1	1	1	1	2	2	2	2	2	2	1	1	2	2	2	2	1	2	1	2	1	1	2	2	李洪玲
HGT-B08	2014-01-14	2	48	1	3	2	1	1	2	#NULL!	1	1	1	3	1	1	1	3	3	3	2	2	2	2	1	1	1	2	2	2	1	2	2	1	2	1	1	2	2	陈丽华
XJ-B44	2014-01-14	2	48	1	1	2	4	2	2	#NULL!	1	1	1	1	1	1	1	3	3	3	3	2	2	1	2	2	1	1	1	2	2	1	2	2	2	1	3	3	2	陈丽华
XJ-B65	2014-01-14	1	48	1	3	2	6	1	2	#NULL!	1	1	2	1	1	1	1	3	2	3	3	3	3	1	1	1	2	#NULL!	2	2	1	2	2	2	2	1	3	3	2	谢庆
XJ-B74	2014-01-14	1	48	1	3	2	1	1	2	#NULL!	1	1	1	1	1	1	1	3	2	3	3	3	3	1	1	1	1	1	1	2	1	2	3	1	1	1	3	3	2	涂中兴
XJX-B105	2014-01-14	2	48	1	3	2	1	2	2	#NULL!	1	1	2	1	1	1	1	1	1	1	1	1	3	2	2	2	1	1	2	2	1	2	4	1	2	1	1	2	2	涂中兴
1	2013-12-30	1	48	1	2	1	1	1	2	#NULL!	1	1	1	3	2	1	1	1	2	2	2	1	2	2	2	1	2	#NULL!	1	1	2	2	2	1	1	3	1	2	2	郭双莉
415	2013-12-31	2	48	1	3	2	9	1	2	#NULL!	1	1	1	1	1	1	1	1	1	1	1	2	2	1	1	1	1	2	1	1	1	1	1	1	1	1	1	2	2	王斌
DH-B79	2014-01-14	2	48	1	4	2	5	1	2	#NULL!	1	2	2	1	1	1	1	1	1	1	1	1	1	2	2	1	1	1	2	2	2	2	4	2	1	1	1	2	2	龙强
XH-B01	2014-01-14	1	48	1	4	2	1	2	1	1	1	2	1	1	1	1	3	1	3	3	3	3	3	2	2	1	1	1	1	2	1	2	4	1	4	1	1	2	2	叶松
QSH-B28	2014-01-14	1	48	#NULL!	4	2	7	1	2	#NULL!	1	2	3	1	1	1	3	1	3	3	3	3	1	1	1	1	1	1	1	1	1	1	3	1	1	1	1	1	2	蔡丹桃
QSH-B60	2014-01-14	2	48	1	3	1	4	1	2	#NULL!	1	2	2	1	1	1	1	1	1	1	1	2	2	1	1	1	1	1	1	1	1	2	2	1	1	1	1	2	2	魏桂英
XJ-B30	2014-01-14	2	48	1	2	2	4	3	2	#NULL!	1	2	2	1	1	1	1	3	3	3	3	2	2	1	2	2	1	1	2	2	2	1	3	2	2	1	3	3	2	凌荣明
XJ-B31	2014-01-14	2	48	1	2	2	1	2	2	#NULL!	1	2	3	1	1	1	1	1	1	1	1	1	3	2	2	2	1	2	2	2	1	2	1	2	2	1	1	2	2	凌荣明
XJ-B71	2014-01-14	1	48	1	3	2	6	1	2	#NULL!	1	2	1	1	1	1	1	3	2	2	3	3	3	1	1	1	1	1	2	2	1	2	1	2	2	1	3	3	2	涂中兴
XJ-B28	2014-01-14	2	48	1	3	2	7	2	2	#NULL!	1	3	2	1	1	1	1	3	3	3	3	2	2	1	2	2	1	1	2	2	1	2	3	2	2	1	3	3	2	陈丽华
XH-B128	2014-01-12	1	48	1	3	2	6	1	2	#NULL!	1	4	1	1	1	1	1	1	1	1	1	1	2	2	2	2	2	#NULL!	2	2	2	2	3	1	1	1	1	2	2	胡玉城
QSH-B10	2014-01-12	2	48	1	2	2	8	1	2	#NULL!	1	4	1	2	1	1	1	3	1	1	1	3	2	2	2	1	1	2	2	2	1	1	4	4	4	3	3	1	2	蔡丹桃
HGT-B11	2014-01-14	1	48	1	1	2	4	1	2	#NULL!	1	4	1	3	1	3	3	3	3	3	3	3	3	2	2	2	2	#NULL!	2	2	2	2	2	2	2	3	3	2	2	戚京城
111	2013-12-30	1	48	1	3	2	1	1	2	#NULL!	1	4	1	1	1	1	1	1	2	2	2	3	3	2	2	1	1	2	1	2	1	1	3	1	1	1	1	1	2	郭双莉
19	2013-12-30	2	48	1	4	2	1	2	1	1	1	4	1	2	1	1	1	1	2	2	2	2	2	2	2	1	2	#NULL!	2	2	1	1	2	1	1	1	1	2	2	路亮
DH-B52	2014-01-14	2	49	1	3	2	4	1	2	#NULL!	2	#NULL!	2	1	1	1	1	1	1	1	1	3	2	#NULL!	#NULL!	#NULL!	#NULL!	#NULL!	#NULL!	#NULL!	#NULL!	#NULL!	1	#NULL!	#NULL!	1	1	2	2	龙强
DH-B57	2014-01-14	2	49	1	3	2	4	1	2	#NULL!	2	#NULL!	2	1	1	1	1	1	1	1	1	3	1	#NULL!	#NULL!	#NULL!	#NULL!	#NULL!	#NULL!	#NULL!	#NULL!	#NULL!	1	#NULL!	#NULL!	1	1	2	2	龙强
DH-B088	2014-01-14	1	49	1	2	2	4	1	2	#NULL!	2	#NULL!	1	1	1	1	1	1	2	2	3	2	2	#NULL!	#NULL!	#NULL!	#NULL!	#NULL!	#NULL!	#NULL!	#NULL!	#NULL!	3	#NULL!	#NULL!	1	2	2	2	龙强
XH-B07	2014-01-14	1	49	1	3	2	5	2	2	#NULL!	2	#NULL!	1	1	1	1	3	3	3	3	3	3	3	#NULL!	#NULL!	#NULL!	#NULL!	#NULL!	#NULL!	#NULL!	#NULL!	#NULL!	4	#NULL!	#NULL!	1	1	2	2	叶松
XH-B28	2014-01-14	2	49	1	2	2	1	2	2	#NULL!	2	#NULL!	1	1	1	1	1	1	1	1	1	1	1	#NULL!	#NULL!	#NULL!	#NULL!	#NULL!	#NULL!	#NULL!	#NULL!	#NULL!	1	#NULL!	#NULL!	3	3	2	2	叶松
XH-B33	2014-01-14	2	49	1	2	2	1	2	2	#NULL!	2	#NULL!	1	1	1	1	1	1	1	1	1	3	3	#NULL!	#NULL!	#NULL!	#NULL!	#NULL!	#NULL!	#NULL!	#NULL!	#NULL!	1	#NULL!	#NULL!	1	1	4	2	叶松
XH-B70	2014-01-14	1	49	1	3	2	5	3	2	#NULL!	2	#NULL!	1	3	3	1	1	1	1	1	1	2	3	#NULL!	#NULL!	#NULL!	#NULL!	#NULL!	#NULL!	#NULL!	#NULL!	#NULL!	1	#NULL!	#NULL!	1	1	4	2	叶松
XHQ-B186	2014-01-13	2	49	1	2	2	9	1	2	#NULL!	2	#NULL!	1	1	1	1	1	1	1	1	1	3	2	#NULL!	#NULL!	#NULL!	#NULL!	#NULL!	#NULL!	#NULL!	#NULL!	#NULL!	1	#NULL!	#NULL!	1	1	4	2	胡玉城
QYP-B19	2014-01-14	2	49	1	3	2	1	3	2	#NULL!	2	#NULL!	1	1	1	3	1	1	1	1	1	1	3	#NULL!	#NULL!	#NULL!	#NULL!	#NULL!	#NULL!	#NULL!	#NULL!	#NULL!	1	#NULL!	#NULL!	1	1	2	2	邓云兰
QYP-B92	2014-01-12	2	49	1	3	2	1	2	2	#NULL!	2	#NULL!	1	1	1	1	1	1	1	1	1	1	1	#NULL!	#NULL!	#NULL!	#NULL!	#NULL!	#NULL!	#NULL!	#NULL!	#NULL!	3	#NULL!	#NULL!	1	1	2	2	章文华
WL-B4	2014-01-14	1	49	1	3	2	1	1	2	#NULL!	2	#NULL!	2	1	3	1	3	1	1	3	3	3	2	#NULL!	#NULL!	#NULL!	#NULL!	#NULL!	#NULL!	#NULL!	#NULL!	#NULL!	2	#NULL!	#NULL!	1	1	2	2	饶裕莲
WL-B32	2014-01-14	1	49	1	3	2	4	3	2	#NULL!	2	#NULL!	2	1	3	2	1	1	3	3	3	1	2	#NULL!	#NULL!	#NULL!	#NULL!	#NULL!	#NULL!	#NULL!	#NULL!	#NULL!	2	#NULL!	#NULL!	2	1	2	2	汪玮
AYX-B3	2014-01-10	2	49	1	2	2	1	3	2	#NULL!	2	#NULL!	1	3	3	3	3	1	2	2	2	2	2	#NULL!	#NULL!	#NULL!	#NULL!	#NULL!	#NULL!	#NULL!	#NULL!	#NULL!	2	#NULL!	#NULL!	3	3	3	2	李才火
109	2013-12-29	2	49	1	2	2	1	1	2	#NULL!	2	#NULL!	2	1	1	1	1	1	1	1	1	1	1	#NULL!	#NULL!	#NULL!	#NULL!	#NULL!	#NULL!	#NULL!	#NULL!	#NULL!	2	#NULL!	#NULL!	1	1	1	2	彭时辉
51	2013-12-30	2	49	1	2	2	1	1	1	1	2	#NULL!	#NULL!	3	3	3	1	1	1	1	1	1	3	#NULL!	#NULL!	#NULL!	#NULL!	#NULL!	#NULL!	#NULL!	#NULL!	#NULL!	2	#NULL!	#NULL!	1	1	3	2	郭双莉
61	2013-12-29	1	49	1	2	1	1	3	2	#NULL!	2	#NULL!	1	1	1	1	1	1	2	2	2	2	2	#NULL!	#NULL!	#NULL!	#NULL!	#NULL!	#NULL!	#NULL!	#NULL!	#NULL!	2	#NULL!	#NULL!	1	1	2	2	郭双莉
69	2013-12-30	1	49	1	3	1	9	1	2	#NULL!	2	#NULL!	#NULL!	3	1	1	1	2	2	2	2	2	2	#NULL!	#NULL!	#NULL!	#NULL!	#NULL!	#NULL!	#NULL!	#NULL!	#NULL!	4	#NULL!	#NULL!	1	1	2	2	郭双莉
XH-B39	2014-01-14	2	49	#NULL!	2	2	4	1	2	#NULL!	1	1	1	3	3	3	3	1	3	3	3	3	3	2	1	1	2	#NULL!	2	2	1	1	1	1	1	1	1	1	2	叶松
XH-B084	2014-01-10	1	49	1	2	2	1	1	2	#NULL!	1	1	3	3	3	3	3	3	3	3	3	3	3	2	2	1	1	1	2	2	1	2	#NULL!	1	1	1	1	2	2	叶松
XH-B118	2014-01-12	2	49	1	3	2	1	2	2	#NULL!	1	1	1	1	1	1	1	1	1	1	1	1	2	2	2	2	2	#NULL!	2	2	2	2	1	1	1	1	1	2	2	胡玉城
XH-B145	2014-01-13	2	49	1	1	2	9	1	2	#NULL!	1	1	1	3	3	3	3	3	3	3	3	3	3	2	1	1	1	1	2	2	2	1	3	2	1	1	1	4	2	叶松
XHQ-B178	2014-01-13	1	49	#NULL!	3	2	1	2	2	#NULL!	1	1	1	1	1	1	1	1	1	1	1	2	2	2	2	2	2	#NULL!	2	2	2	2	3	1	1	1	1	2	2	胡玉城
QYP-B20	2014-01-14	1	49	1	2	2	1	3	2	#NULL!	1	1	1	1	1	1	1	1	3	3	3	3	2	2	2	2	1	2	2	2	1	2	2	1	2	1	1	2	2	邓云兰
XJ-B19	2014-01-14	1	49	1	2	1	1	#NULL!	2	#NULL!	1	1	1	1	1	1	2	3	3	3	3	2	2	1	2	2	1	1	2	2	1	1	3	1	2	1	3	3	2	凌荣明
XJX-B117	2014-01-14	1	49	1	2	2	8	2	2	#NULL!	1	1	1	1	1	1	1	1	1	1	1	1	2	2	2	2	1	1	2	2	1	2	3	1	2	1	1	2	2	涂中兴
XJX-B123	2014-01-14	1	49	1	3	2	8	3	2	#NULL!	1	1	1	1	1	1	1	1	1	1	1	1	3	2	2	2	1	2	2	2	1	2	4	1	1	1	1	2	2	涂中兴
151	2013-12-30	1	49	1	1	2	1	1	2	#NULL!	1	1	1	2	1	1	1	2	2	2	2	2	2	1	2	1	1	2	1	2	1	2	3	1	2	1	1	2	2	彭时辉
DH-B47	2014-01-14	1	49	1	2	2	4	1	2	#NULL!	1	2	2	1	1	1	1	1	1	1	1	1	2	2	2	1	1	1	2	2	2	2	2	1	2	1	1	2	2	朱春芳
DH-B106	2014-01-14	2	49	1	3	2	1	1	2	#NULL!	1	2	1	1	1	1	1	1	1	1	1	2	1	2	2	1	1	1	2	2	1	2	1	1	2	1	1	2	2	郭艳萍
XH-B124	2014-01-12	2	49	1	2	2	6	1	2	#NULL!	1	2	1	1	1	1	1	1	1	1	1	1	1	2	2	2	2	#NULL!	2	2	2	2	1	1	1	1	1	2	2	胡玉城
XJ-B36	2014-01-14	2	49	1	2	1	1	2	2	#NULL!	1	2	2	1	1	1	1	3	3	3	3	2	2	1	2	2	1	1	2	2	1	2	2	2	2	1	3	3	2	陈丽华
XH-B158	2014-01-13	1	49	1	3	#NULL!	4	1	2	#NULL!	1	5	1	1	1	3	3	2	2	3	3	3	3	2	2	2	2	#NULL!	1	1	1	1	2	1	1	1	1	4	2	熊楚妮
DH-B24	2014-01-13	2	50	1	2	2	4	2	2	#NULL!	2	#NULL!	3	1	1	1	3	3	3	3	3	3	3	#NULL!	#NULL!	#NULL!	#NULL!	#NULL!	#NULL!	#NULL!	#NULL!	#NULL!	1	#NULL!	#NULL!	1	3	2	2	朱春芳
DH-B39	2014-01-14	2	50	1	2	2	4	1	2	#NULL!	2	#NULL!	2	1	1	1	1	1	1	1	1	1	3	#NULL!	#NULL!	#NULL!	#NULL!	#NULL!	#NULL!	#NULL!	#NULL!	#NULL!	1	#NULL!	#NULL!	1	1	2	2	朱春芳
XH-B67	2014-01-14	2	50	#NULL!	2	2	4	2	2	#NULL!	2	#NULL!	1	1	1	1	1	1	1	1	1	1	2	#NULL!	#NULL!	#NULL!	#NULL!	#NULL!	#NULL!	#NULL!	#NULL!	#NULL!	1	#NULL!	#NULL!	1	1	2	2	叶松
XH-B71	2014-01-14	1	50	1	3	2	1	2	1	#NULL!	2	#NULL!	1	1	1	1	1	1	1	1	1	2	2	#NULL!	#NULL!	#NULL!	#NULL!	#NULL!	#NULL!	#NULL!	#NULL!	#NULL!	1	#NULL!	#NULL!	1	1	1	2	叶松
XH-B142	2014-01-13	1	50	1	3	2	5	1	2	#NULL!	2	#NULL!	#NULL!	1	1	1	1	1	1	2	3	1	2	#NULL!	#NULL!	#NULL!	#NULL!	#NULL!	#NULL!	#NULL!	#NULL!	#NULL!	2	#NULL!	#NULL!	1	1	1	2	叶松
XH-B160	2014-01-13	2	50	1	1	#NULL!	4	1	2	#NULL!	2	#NULL!	1	1	3	3	3	1	3	3	3	3	3	#NULL!	#NULL!	#NULL!	#NULL!	#NULL!	#NULL!	#NULL!	#NULL!	#NULL!	1	#NULL!	#NULL!	1	1	2	2	王蓉
QSH-B43	2014-01-14	1	50	1	3	2	5	2	2	#NULL!	2	#NULL!	2	1	1	1	1	1	1	1	1	3	1	#NULL!	#NULL!	#NULL!	#NULL!	#NULL!	#NULL!	#NULL!	#NULL!	#NULL!	2	#NULL!	#NULL!	1	1	1	2	郭金
QSH-B55	2014-01-14	2	50	1	2	2	1	1	1	1	2	#NULL!	1	2	1	1	1	1	3	3	3	2	2	#NULL!	#NULL!	#NULL!	#NULL!	#NULL!	#NULL!	#NULL!	#NULL!	#NULL!	2	#NULL!	#NULL!	1	3	2	2	魏桂英
QYP-B1	2014-01-14	2	50	1	1	2	1	3	2	#NULL!	2	#NULL!	#NULL!	1	1	1	1	1	1	1	1	1	1	#NULL!	#NULL!	#NULL!	#NULL!	#NULL!	#NULL!	#NULL!	#NULL!	#NULL!	1	#NULL!	#NULL!	1	1	2	2	吴海亮
QYP-B5	2014-01-14	2	50	1	2	2	9	1	2	#NULL!	2	#NULL!	3	1	1	1	1	1	1	1	1	1	2	#NULL!	#NULL!	#NULL!	#NULL!	#NULL!	#NULL!	#NULL!	#NULL!	#NULL!	2	#NULL!	#NULL!	1	1	1	2	吴海亮
QYP-B29	2014-01-14	1	50	1	3	2	1	2	2	#NULL!	2	#NULL!	3	1	1	1	1	1	1	1	1	1	2	#NULL!	#NULL!	#NULL!	#NULL!	#NULL!	#NULL!	#NULL!	#NULL!	#NULL!	1	#NULL!	#NULL!	1	1	4	2	周军华
QYP-B38	2014-01-14	2	50	1	2	2	7	2	2	#NULL!	2	#NULL!	1	1	1	1	1	1	1	1	1	3	1	#NULL!	#NULL!	#NULL!	#NULL!	#NULL!	#NULL!	#NULL!	#NULL!	#NULL!	3	#NULL!	#NULL!	1	1	2	2	章文华
QYP-B104	2014-01-13	2	50	1	2	2	4	2	2	#NULL!	2	#NULL!	1	1	1	1	1	1	1	1	1	1	2	#NULL!	#NULL!	#NULL!	#NULL!	#NULL!	#NULL!	#NULL!	#NULL!	#NULL!	2	#NULL!	#NULL!	1	1	2	2	章文华
WL-B14	2014-01-14	2	50	1	1	2	10	1	2	#NULL!	2	#NULL!	3	3	1	3	1	1	3	3	1	1	2	#NULL!	#NULL!	#NULL!	#NULL!	#NULL!	#NULL!	#NULL!	#NULL!	#NULL!	2	#NULL!	#NULL!	1	3	2	2	饶裕莲
WL-B28	2014-01-14	1	50	1	3	2	6	1	2	#NULL!	2	#NULL!	2	1	1	2	3	1	2	2	3	3	2	#NULL!	#NULL!	#NULL!	#NULL!	#NULL!	#NULL!	#NULL!	#NULL!	#NULL!	2	#NULL!	#NULL!	3	3	2	2	饶裕莲
2	2014-01-14	2	50	1	2	1	9	1	2	#NULL!	2	#NULL!	2	1	1	1	1	3	2	2	2	2	2	#NULL!	#NULL!	#NULL!	#NULL!	#NULL!	#NULL!	#NULL!	#NULL!	#NULL!	2	#NULL!	#NULL!	1	1	1	2	郭双莉
HGT-B17	2014-01-14	2	50	1	1	2	4	1	2	#NULL!	2	#NULL!	1	3	1	1	3	3	3	3	2	3	2	#NULL!	#NULL!	#NULL!	#NULL!	#NULL!	#NULL!	#NULL!	#NULL!	#NULL!	2	#NULL!	#NULL!	1	3	2	2	戚京城
AYX-B36	2014-01-10	2	50	1	4	2	1	2	2	#NULL!	2	#NULL!	2	1	1	1	1	1	1	1	1	2	2	#NULL!	#NULL!	#NULL!	#NULL!	#NULL!	#NULL!	#NULL!	#NULL!	#NULL!	3	#NULL!	#NULL!	1	1	2	2	肖芸
AYX-B39	2014-01-13	1	50	1	4	2	1	2	2	#NULL!	2	#NULL!	1	1	1	1	1	1	1	1	1	2	2	#NULL!	#NULL!	#NULL!	#NULL!	#NULL!	#NULL!	#NULL!	#NULL!	#NULL!	3	#NULL!	#NULL!	1	1	2	2	肖芸
AYX-B45	2014-01-13	1	50	1	3	1	1	2	2	#NULL!	2	#NULL!	3	1	1	1	1	1	1	1	1	1	1	#NULL!	#NULL!	#NULL!	#NULL!	#NULL!	#NULL!	#NULL!	#NULL!	#NULL!	2	#NULL!	#NULL!	1	1	2	2	杨昌林
228	2013-12-30	2	50	1	1	2	1	1	2	#NULL!	2	#NULL!	1	3	3	3	3	3	3	3	3	3	3	#NULL!	#NULL!	#NULL!	#NULL!	#NULL!	#NULL!	#NULL!	#NULL!	#NULL!	4	#NULL!	#NULL!	3	3	2	2	彭时辉
12	2013-12-29	2	50	1	2	2	1	1	1	1	2	#NULL!	1	1	1	1	1	1	1	1	1	1	2	#NULL!	#NULL!	#NULL!	#NULL!	#NULL!	#NULL!	#NULL!	#NULL!	#NULL!	3	#NULL!	#NULL!	1	1	2	2	郭双莉
17	2013-12-29	1	50	1	2	2	1	2	2	#NULL!	2	#NULL!	3	2	1	#NULL!	1	1	3	3	3	3	3	#NULL!	#NULL!	#NULL!	#NULL!	#NULL!	#NULL!	#NULL!	#NULL!	#NULL!	2	#NULL!	#NULL!	1	1	2	2	郭双莉
DH-B1	2014-01-12	2	50	1	1	1	1	2	2	#NULL!	1	1	1	3	1	3	3	1	3	2	1	3	1	2	2	2	1	1	2	2	1	2	1	1	2	1	1	2	2	朱春芳
DH-B105	2014-01-14	1	50	1	1	2	5	1	2	#NULL!	1	1	1	1	1	1	1	1	1	1	1	1	2	2	2	2	2	#NULL!	2	2	2	2	3	1	1	1	1	2	2	郭艳萍
XH-B17	2014-01-14	1	50	1	5	2	9	2	2	#NULL!	1	1	1	1	1	1	1	1	1	1	1	2	1	1	1	1	1	1	1	1	1	1	3	1	1	1	1	4	2	叶松
XH-B095	2014-01-12	1	50	1	2	2	1	1	2	#NULL!	1	1	1	3	1	1	1	1	3	1	3	3	1	1	2	1	1	1	2	2	1	1	3	1	2	1	1	2	2	叶松
XH-B108	2014-01-12	1	50	1	3	2	1	2	2	#NULL!	1	1	1	1	1	1	3	1	1	1	1	2	2	2	1	2	2	#NULL!	2	2	2	2	2	1	1	1	1	2	2	胡玉城
XH-B125	2014-01-12	1	50	1	3	2	7	2	2	#NULL!	1	1	1	1	1	1	1	1	1	1	1	3	2	2	2	2	2	#NULL!	2	2	2	2	3	1	1	1	1	2	2	兰彪
QSH-B1	2014-01-12	2	50	1	2	2	1	2	2	#NULL!	1	1	2	2	1	1	1	1	3	2	2	2	2	2	2	1	1	2	1	2	1	1	2	1	1	1	1	2	2	蔡丹桃
QSH-B12	2014-01-12	2	50	1	3	2	8	1	2	#NULL!	1	1	1	1	1	1	1	1	1	1	1	1	1	2	2	2	1	1	2	2	1	2	3	1	1	1	1	2	2	蔡丹桃
QSH-B62	2014-01-14	2	50	1	3	2	4	1	2	#NULL!	1	1	2	1	1	1	1	1	1	1	1	2	1	1	1	1	1	1	1	1	1	2	1	1	1	1	1	2	2	魏桂英
QYP-B32	2014-01-14	1	50	1	1	2	1	3	2	#NULL!	1	1	1	1	1	1	1	1	1	1	1	1	1	1	2	1	1	2	2	2	1	1	2	1	1	1	1	2	2	章文华
QYP-B47	2014-01-15	2	50	1	3	2	10	2	2	#NULL!	1	1	1	1	1	1	1	1	1	1	1	1	1	1	1	1	1	2	1	1	1	1	1	1	1	1	1	1	2	张莉
XJ-B59	2014-01-14	2	50	1	2	2	8	1	2	#NULL!	1	1	1	2	1	1	1	3	3	2	2	2	3	1	1	1	1	1	2	2	1	2	2	2	2	1	3	3	2	涂中兴
XJ-B63	2014-01-14	1	50	1	3	2	7	1	2	#NULL!	1	1	1	1	1	1	1	3	3	3	3	2	3	1	1	1	2	#NULL!	2	2	1	2	2	2	2	1	3	3	2	涂中兴
XJ-B75	2014-01-14	2	50	1	2	2	9	1	2	#NULL!	1	1	2	1	1	1	1	1	1	1	1	1	3	2	2	2	1	2	2	2	1	2	4	1	2	1	1	2	2	涂中兴
74	2013-12-30	1	50	1	3	2	1	1	2	#NULL!	1	1	1	2	1	1	1	1	2	2	2	2	2	1	1	1	1	2	1	1	1	1	2	2	2	1	1	4	2	郭双莉
DH-B59	2014-01-14	1	50	1	1	2	5	4	2	#NULL!	1	2	2	1	1	1	1	1	1	3	1	3	3	2	2	1	1	1	2	2	1	2	1	2	1	1	1	2	2	龙强
DH-B62	2014-01-14	2	50	1	3	2	7	1	2	#NULL!	1	2	2	1	1	1	1	1	1	2	1	2	3	2	2	1	1	1	2	2	1	1	1	1	1	1	1	#NULL!	2	龙强
DH-B73	2014-01-14	2	50	1	3	2	1	1	2	#NULL!	1	2	1	1	1	1	1	1	1	1	1	1	1	2	2	1	1	1	2	2	1	2	1	1	2	1	1	2	2	蔡丹桃
QSH-B48	2014-01-14	1	50	1	2	2	4	2	2	#NULL!	1	2	1	1	1	1	1	1	1	1	1	1	1	2	2	2	1	1	2	2	2	2	2	1	1	2	2	1	2	蔡丹桃
XJ-B77	2014-01-14	1	50	1	3	2	9	2	2	#NULL!	1	2	1	1	1	1	1	1	1	1	1	1	3	2	2	2	1	2	2	2	1	2	2	2	2	1	1	2	2	涂中兴
XJX-B131	2014-01-14	1	50	1	#NULL!	2	5	3	2	#NULL!	1	2	1	1	1	1	1	1	1	1	1	2	2	2	2	2	1	#NULL!	2	2	2	1	2	1	2	1	1	2	2	涂中兴
58	2013-12-29	1	50	1	3	2	1	1	2	#NULL!	1	2	1	2	1	2	1	3	2	2	2	2	2	1	2	2	1	1	2	2	1	2	2	1	1	1	1	4	2	郭双莉
3	2013-12-29	1	50	1	1	2	1	3	2	#NULL!	1	2	1	1	1	1	1	3	3	3	3	3	3	1	1	1	1	1	1	2	2	2	2	1	2	1	1	2	2	郭双莉
XHQ-B171	2014-01-13	2	50	1	2	2	4	1	2	#NULL!	1	4	1	1	1	1	1	1	1	1	1	3	2	2	2	2	2	#NULL!	2	2	2	2	2	1	1	1	1	2	2	兰彪
AYX-B8	2014-01-10	2	50	1	2	2	1	1	2	#NULL!	1	4	1	3	3	3	3	3	3	3	3	3	3	2	2	1	1	2	2	2	1	2	2	1	#NULL!	1	1	4	2	李才火
DH-B26	2014-01-14	1	51	1	2	2	4	1	2	#NULL!	2	#NULL!	1	1	1	1	1	1	1	1	1	1	2	#NULL!	#NULL!	#NULL!	#NULL!	#NULL!	#NULL!	#NULL!	#NULL!	#NULL!	1	#NULL!	#NULL!	1	1	2	2	叶松
XH-B16	2014-01-14	2	51	1	4	2	9	3	2	#NULL!	2	#NULL!	1	1	1	1	1	3	1	1	3	3	2	#NULL!	#NULL!	#NULL!	#NULL!	#NULL!	#NULL!	#NULL!	#NULL!	#NULL!	4	#NULL!	#NULL!	3	3	4	2	兰彪
XH-B146	2014-01-13	1	51	1	2	#NULL!	4	1	2	#NULL!	2	#NULL!	1	2	3	3	3	3	3	3	3	3	3	#NULL!	#NULL!	#NULL!	#NULL!	#NULL!	#NULL!	#NULL!	#NULL!	#NULL!	1	#NULL!	#NULL!	1	1	4	2	熊楚妮
QYP-B25	2014-01-14	2	51	1	1	2	1	1	2	#NULL!	2	#NULL!	2	1	3	1	1	1	2	2	2	2	2	#NULL!	#NULL!	#NULL!	#NULL!	#NULL!	#NULL!	#NULL!	#NULL!	#NULL!	1	#NULL!	#NULL!	1	1	3	2	周军华
QYP-B69	2014-01-17	2	51	1	1	2	9	1	2	#NULL!	2	#NULL!	1	1	1	1	1	1	1	1	1	2	2	#NULL!	#NULL!	#NULL!	#NULL!	#NULL!	#NULL!	#NULL!	#NULL!	#NULL!	2	#NULL!	#NULL!	1	1	2	2	邓云兰
QYP-B74	2014-01-17	1	51	1	4	2	4	3	2	#NULL!	2	#NULL!	3	1	1	1	1	1	1	1	1	1	1	#NULL!	#NULL!	#NULL!	#NULL!	#NULL!	#NULL!	#NULL!	#NULL!	#NULL!	1	#NULL!	#NULL!	1	1	4	2	吴海亮
WL-B9	2014-01-14	2	51	1	3	2	1	2	2	#NULL!	2	#NULL!	3	3	1	3	2	1	3	3	2	2	2	#NULL!	#NULL!	#NULL!	#NULL!	#NULL!	#NULL!	#NULL!	#NULL!	#NULL!	2	#NULL!	#NULL!	1	3	2	2	饶裕莲
HGT-B15	2014-01-14	1	51	1	1	2	1	1	2	#NULL!	2	#NULL!	1	1	1	1	1	1	3	3	3	3	3	#NULL!	#NULL!	#NULL!	#NULL!	#NULL!	#NULL!	#NULL!	#NULL!	#NULL!	2	#NULL!	#NULL!	1	1	2	2	戚京城
HGT-B23	2014-01-14	2	51	1	1	2	4	1	2	#NULL!	2	#NULL!	1	1	1	1	1	1	1	1	1	1	2	#NULL!	#NULL!	#NULL!	#NULL!	#NULL!	#NULL!	#NULL!	#NULL!	#NULL!	2	#NULL!	#NULL!	1	1	1	2	戚京城
AYX-B5	2014-01-10	1	51	1	4	2	1	2	2	#NULL!	2	#NULL!	1	1	1	1	1	1	1	1	1	1	1	#NULL!	#NULL!	#NULL!	#NULL!	#NULL!	#NULL!	#NULL!	#NULL!	#NULL!	3	#NULL!	#NULL!	1	1	4	2	李才火
AYX-B18	2014-01-10	2	51	1	2	1	1	2	2	#NULL!	2	#NULL!	2	1	1	1	1	1	1	1	1	1	2	#NULL!	#NULL!	#NULL!	#NULL!	#NULL!	#NULL!	#NULL!	#NULL!	#NULL!	2	#NULL!	#NULL!	1	1	2	2	杨昌林
413	2013-12-31	1	51	1	2	2	9	1	2	#NULL!	2	#NULL!	1	3	3	3	3	3	3	3	3	3	3	#NULL!	#NULL!	#NULL!	#NULL!	#NULL!	#NULL!	#NULL!	#NULL!	#NULL!	2	#NULL!	#NULL!	3	3	2	2	王斌
XH-B22	2014-01-14	2	51	1	4	2	1	2	2	#NULL!	1	1	1	1	1	1	1	1	3	1	1	1	3	2	1	2	1	1	2	2	1	2	1	1	2	1	1	4	2	叶松
QYP-B31	2014-01-14	2	51	1	1	2	1	2	2	#NULL!	1	1	1	1	1	1	1	1	1	1	1	1	1	2	1	1	1	2	2	2	1	1	2	1	1	1	1	2	2	章文华
HGT-B06	2014-01-14	1	51	1	2	2	1	1	2	#NULL!	1	1	#NULL!	1	1	1	1	1	3	3	3	3	2	2	1	1	1	2	1	1	1	1	2	1	1	1	1	2	2	戚京城
AYX-B14	2014-01-10	1	51	1	5	2	1	1	2	#NULL!	1	1	2	1	1	1	1	1	1	1	1	1	1	2	2	1	1	2	1	1	1	1	3	1	1	1	1	4	2	李才火
220	2013-12-30	2	51	1	2	2	1	1	1	1	1	1	1	1	1	1	1	1	1	1	1	2	2	1	1	1	1	1	2	2	1	2	2	1	1	2	1	2	2	彭时辉
DH-B141	2014-01-14	2	51	1	2	2	1	1	2	#NULL!	1	2	1	1	1	1	1	1	1	1	1	1	2	2	2	1	1	1	2	2	1	2	1	1	1	1	1	2	2	郭艳萍
XJ-B45	2014-01-14	1	51	1	3	#NULL!	1	#NULL!	2	#NULL!	1	3	2	1	1	1	1	3	3	3	3	3	2	1	2	2	1	1	2	2	1	2	2	2	2	1	3	4	2	凌荣明
QYP-B79	2014-01-17	2	51	1	2	2	4	1	2	#NULL!	1	4	2	1	1	1	1	1	1	1	1	1	2	1	1	1	1	2	1	2	1	1	3	1	1	1	1	4	2	张莉
XH-B19	2014-01-14	1	51	1	5	2	9	1	2	#NULL!	1	5	1	1	1	1	3	1	3	1	1	2	1	2	2	2	2	#NULL!	2	2	2	2	4	1	1	1	1	4	2	叶松
DH-B38	2014-01-14	2	52	1	3	2	4	1	2	#NULL!	2	#NULL!	2	1	1	1	1	1	1	1	1	3	3	#NULL!	#NULL!	#NULL!	#NULL!	#NULL!	#NULL!	#NULL!	#NULL!	#NULL!	4	#NULL!	#NULL!	1	1	2	2	朱春芳
DH-B42	2014-01-14	2	52	1	2	2	4	1	2	#NULL!	2	#NULL!	2	1	1	1	1	1	1	1	1	3	3	#NULL!	#NULL!	#NULL!	#NULL!	#NULL!	#NULL!	#NULL!	#NULL!	#NULL!	1	#NULL!	#NULL!	1	1	2	2	朱春芳
DH-B119	2014-01-12	2	52	1	2	2	8	1	2	#NULL!	2	#NULL!	1	1	1	1	1	1	1	1	1	1	3	#NULL!	#NULL!	#NULL!	#NULL!	#NULL!	#NULL!	#NULL!	#NULL!	#NULL!	1	#NULL!	#NULL!	1	1	2	2	郭艳萍
DH-B131	2014-01-13	2	52	1	1	2	6	2	2	#NULL!	2	#NULL!	1	1	1	3	3	1	3	3	3	3	3	#NULL!	#NULL!	#NULL!	#NULL!	#NULL!	#NULL!	#NULL!	#NULL!	#NULL!	1	#NULL!	#NULL!	1	1	2	2	郭艳萍
XHQ-B166	2014-01-13	1	52	1	2	2	7	3	2	#NULL!	2	#NULL!	1	1	1	1	1	1	1	1	1	2	2	#NULL!	#NULL!	#NULL!	#NULL!	#NULL!	#NULL!	#NULL!	#NULL!	#NULL!	1	#NULL!	#NULL!	1	1	4	2	兰彪
XHQ-B167	2014-01-13	1	52	1	2	2	7	2	2	#NULL!	2	#NULL!	1	1	1	1	1	1	1	1	1	2	1	#NULL!	#NULL!	#NULL!	#NULL!	#NULL!	#NULL!	#NULL!	#NULL!	#NULL!	1	#NULL!	#NULL!	1	1	4	2	胡玉城
QSH-B4	2014-01-12	2	52	1	2	2	1	2	2	#NULL!	2	#NULL!	1	3	3	3	3	2	2	2	2	2	2	#NULL!	#NULL!	#NULL!	#NULL!	#NULL!	#NULL!	#NULL!	#NULL!	#NULL!	4	#NULL!	#NULL!	3	1	1	2	蔡丹桃
QSH-B31	2014-01-14	2	52	#NULL!	3	2	1	1	2	#NULL!	2	#NULL!	2	1	1	1	1	1	1	1	1	2	1	#NULL!	#NULL!	#NULL!	#NULL!	#NULL!	#NULL!	#NULL!	#NULL!	#NULL!	3	#NULL!	#NULL!	1	1	1	2	蔡丹桃
QSH-B46	2014-01-14	2	52	1	2	2	1	2	2	#NULL!	2	#NULL!	1	2	1	2	1	2	2	2	2	2	2	#NULL!	#NULL!	#NULL!	#NULL!	#NULL!	#NULL!	#NULL!	#NULL!	#NULL!	4	#NULL!	#NULL!	1	1	4	2	郭金
QSH-B52	2014-01-14	2	52	1	1	2	9	1	2	#NULL!	2	#NULL!	1	3	3	3	3	3	3	3	3	3	2	#NULL!	#NULL!	#NULL!	#NULL!	#NULL!	#NULL!	#NULL!	#NULL!	#NULL!	4	#NULL!	#NULL!	1	3	2	2	郭金
QSH-B53	2014-01-14	2	52	1	2	2	4	1	2	#NULL!	2	#NULL!	1	1	2	1	1	2	2	2	1	2	2	#NULL!	#NULL!	#NULL!	#NULL!	#NULL!	#NULL!	#NULL!	#NULL!	#NULL!	4	#NULL!	#NULL!	1	1	1	2	郭金
DH-B11	2014-01-12	2	52	1	2	2	4	1	2	#NULL!	1	1	1	1	1	1	1	1	1	1	1	1	1	2	2	2	1	#NULL!	2	2	1	2	4	1	2	1	1	2	2	朱春芳
DH-B75	2014-01-14	1	52	1	2	2	4	1	2	#NULL!	1	1	1	1	1	1	1	1	1	1	1	3	3	2	2	1	1	1	2	2	1	2	1	1	1	1	1	2	2	龙强
XH-B121	2014-01-12	1	52	1	2	2	1	2	2	#NULL!	1	1	1	1	1	1	1	1	1	1	1	1	1	2	2	2	2	#NULL!	2	2	2	2	4	1	1	1	1	1	2	兰彪
XHQ-B162	2014-01-13	2	52	1	2	#NULL!	4	1	2	#NULL!	1	1	1	3	3	3	3	3	3	3	3	3	3	2	1	1	1	#NULL!	2	2	1	2	4	1	1	1	1	4	2	叶松
QSH-B51	2014-01-14	1	52	1	2	2	1	2	2	#NULL!	1	1	3	1	1	1	1	1	1	1	1	2	2	2	2	1	1	2	2	2	2	2	2	1	2	1	1	2	2	郭金
XJ-B47	2014-01-14	1	52	1	3	2	1	2	2	#NULL!	1	1	1	1	1	1	1	3	3	3	3	3	2	1	2	2	1	1	2	2	1	2	2	2	2	1	3	2	2	陈丽华
114	2013-12-29	2	52	1	2	2	1	1	2	#NULL!	1	1	1	1	1	1	1	1	3	3	3	3	2	1	1	1	1	1	2	2	1	2	4	1	4	1	1	2	2	彭时辉
DH-B098	2014-01-14	2	52	1	2	2	6	1	2	#NULL!	1	2	1	1	1	1	1	3	3	3	3	3	2	2	2	2	2	#NULL!	2	2	2	2	3	1	1	1	2	1	2	龙强
DH-B111	2014-01-12	2	52	1	2	2	4	1	2	#NULL!	1	2	1	1	1	1	1	1	2	2	2	2	2	2	2	2	2	#NULL!	2	2	2	2	3	2	1	1	2	2	2	郭艳萍
DH-B132	2014-01-13	1	52	1	2	2	1	1	2	#NULL!	1	2	2	1	1	1	1	1	1	1	1	1	3	2	2	1	1	1	2	2	1	2	1	1	1	1	1	2	2	郭艳萍
XH-B132	2014-01-12	2	52	1	3	2	7	2	2	#NULL!	1	4	1	1	1	1	1	1	1	1	1	1	1	2	2	2	2	#NULL!	2	2	2	2	2	1	1	1	1	2	2	胡玉城
QYP-B16	2014-01-14	2	52	1	3	2	5	3	2	#NULL!	1	4	1	1	1	1	1	1	1	2	2	2	1	2	2	2	2	#NULL!	2	2	2	2	2	2	2	1	1	1	2	邓云兰
AYX-B7	2014-01-10	1	52	1	2	2	1	2	2	#NULL!	1	4	2	3	3	1	3	1	3	3	3	3	3	2	2	1	1	2	2	2	2	2	2	1	2	3	1	4	2	李才火
204	2013-12-30	1	52	1	3	2	1	3	2	#NULL!	1	4	1	3	3	3	3	3	3	3	3	3	3	1	2	1	2	#NULL!	1	2	1	2	2	1	2	1	1	2	2	彭时辉
DH-B093	2014-01-14	2	53	1	2	2	4	1	2	#NULL!	2	#NULL!	1	1	1	1	1	1	2	2	1	2	2	#NULL!	#NULL!	#NULL!	#NULL!	#NULL!	#NULL!	#NULL!	#NULL!	#NULL!	1	#NULL!	#NULL!	1	2	2	2	龙强
XH-B31	2014-01-14	2	53	1	4	2	9	1	2	#NULL!	2	#NULL!	1	1	1	1	1	1	1	1	1	3	3	#NULL!	#NULL!	#NULL!	#NULL!	#NULL!	#NULL!	#NULL!	#NULL!	#NULL!	1	#NULL!	#NULL!	2	1	4	2	叶松
XH-B34	2014-01-14	2	53	1	2	2	1	#NULL!	2	#NULL!	2	#NULL!	2	3	3	3	3	3	3	3	3	3	3	#NULL!	#NULL!	#NULL!	#NULL!	#NULL!	#NULL!	#NULL!	#NULL!	#NULL!	2	#NULL!	#NULL!	1	1	1	2	胡玉成
XH-B59	2014-01-14	1	53	1	3	2	4	2	2	#NULL!	2	#NULL!	1	1	3	1	1	1	1	1	1	3	3	#NULL!	#NULL!	#NULL!	#NULL!	#NULL!	#NULL!	#NULL!	#NULL!	#NULL!	1	#NULL!	#NULL!	1	1	4	2	叶松
XH-B76	2014-01-14	2	53	1	2	2	1	3	2	#NULL!	2	#NULL!	1	1	3	3	1	1	1	1	1	2	2	#NULL!	#NULL!	#NULL!	#NULL!	#NULL!	#NULL!	#NULL!	#NULL!	#NULL!	4	#NULL!	#NULL!	3	3	2	2	叶松
XH-B78	2014-01-14	2	53	1	2	2	4	3	2	#NULL!	2	#NULL!	1	1	3	1	3	1	1	1	1	1	3	#NULL!	#NULL!	#NULL!	#NULL!	#NULL!	#NULL!	#NULL!	#NULL!	#NULL!	1	#NULL!	#NULL!	1	1	1	2	胡玉成
QSH-B17	2014-01-13	1	53	#NULL!	2	2	7	2	2	#NULL!	2	#NULL!	1	1	2	1	1	1	1	1	1	1	2	#NULL!	#NULL!	#NULL!	#NULL!	#NULL!	#NULL!	#NULL!	#NULL!	#NULL!	2	#NULL!	#NULL!	1	1	1	2	蔡丹桃
QSH-B20	2014-01-13	2	53	#NULL!	1	2	1	2	2	#NULL!	2	#NULL!	2	1	2	1	2	3	3	3	3	3	2	#NULL!	#NULL!	#NULL!	#NULL!	#NULL!	#NULL!	#NULL!	#NULL!	#NULL!	2	#NULL!	#NULL!	1	1	1	2	郭金
QYP-B21	2014-01-14	2	53	1	4	2	4	1	2	#NULL!	2	#NULL!	2	1	2	1	1	1	2	2	2	2	2	#NULL!	#NULL!	#NULL!	#NULL!	#NULL!	#NULL!	#NULL!	#NULL!	#NULL!	1	#NULL!	#NULL!	1	1	2	2	周军华
QYP-B34	2014-01-14	2	53	1	3	2	1	2	2	#NULL!	2	#NULL!	#NULL!	1	1	1	1	1	1	1	1	1	1	#NULL!	#NULL!	#NULL!	#NULL!	#NULL!	#NULL!	#NULL!	#NULL!	#NULL!	1	#NULL!	#NULL!	1	1	2	2	章文华
QYP-B42	2014-01-14	2	53	1	3	2	1	1	2	#NULL!	2	#NULL!	1	2	1	1	1	1	1	1	1	1	2	#NULL!	#NULL!	#NULL!	#NULL!	#NULL!	#NULL!	#NULL!	#NULL!	#NULL!	1	#NULL!	#NULL!	1	1	2	2	李洪玲
71	2013-12-30	1	53	1	4	1	6	3	2	#NULL!	2	#NULL!	1	1	1	1	1	1	2	2	2	3	2	#NULL!	#NULL!	#NULL!	#NULL!	#NULL!	#NULL!	#NULL!	#NULL!	#NULL!	4	#NULL!	#NULL!	1	1	4	2	路亮
XH-B097	2014-01-12	1	53	1	2	2	1	2	2	#NULL!	1	1	2	3	3	3	3	3	3	3	3	3	3	2	2	2	1	1	2	2	2	2	3	3	4	1	3	4	2	叶松
XHQ-B172	2014-01-13	2	53	1	2	2	9	1	2	#NULL!	1	1	1	1	1	1	1	1	1	1	1	1	1	2	2	2	2	#NULL!	2	2	2	2	4	1	1	1	1	2	2	胡玉城
XJX-B086	2014-01-14	2	53	1	3	2	6	2	2	#NULL!	1	1	2	1	1	1	1	1	1	1	1	1	3	2	2	2	1	1	2	2	1	2	2	2	2	1	1	2	2	涂中兴
XJX-B103	2014-01-14	1	53	1	3	2	7	2	2	#NULL!	1	1	2	1	1	1	1	1	1	1	1	1	3	2	2	2	1	1	2	2	1	2	1	2	2	1	1	2	2	涂中兴
XJX-B109	2014-01-14	1	53	1	3	2	9	2	2	#NULL!	1	1	1	1	1	1	1	1	1	1	1	1	3	2	2	2	1	2	2	2	2	2	2	1	2	1	1	2	2	涂中兴
AYX-B2	2014-01-10	2	53	1	3	2	1	2	2	#NULL!	1	1	1	1	1	1	1	1	2	2	2	3	2	2	2	1	1	2	2	2	1	1	3	1	1	1	1	4	2	李才火
118	2013-12-30	1	53	1	2	1	3	1	2	#NULL!	1	1	1	1	1	1	3	1	2	2	2	2	2	2	2	2	2	#NULL!	2	2	1	1	2	1	1	1	1	1	2	郭双莉
DH-B114	2014-01-12	1	53	1	1	2	4	1	2	#NULL!	1	2	1	1	1	1	1	3	3	3	3	3	2	2	2	2	2	#NULL!	2	2	2	2	3	2	1	1	2	2	2	彭时辉
DH-B140	2014-01-14	2	53	1	1	2	4	1	2	#NULL!	1	2	1	1	1	1	1	1	1	1	3	3	2	2	2	1	2	#NULL!	2	2	1	2	1	2	2	1	1	2	2	彭时辉
DH-B142	2014-01-14	2	53	1	1	2	5	1	2	#NULL!	1	2	1	1	1	1	1	1	1	1	1	3	3	2	2	1	1	1	2	2	1	2	1	1	1	1	1	2	2	彭时辉
XJ-B49	2014-01-14	2	53	1	2	#NULL!	1	2	2	#NULL!	1	2	1	1	1	1	1	1	1	1	1	1	3	2	2	2	1	2	2	2	1	2	2	2	2	1	1	3	2	陈丽华
XJX-B101	2014-01-14	1	53	1	3	2	1	2	2	#NULL!	1	2	1	1	1	1	1	1	1	1	1	1	3	2	2	2	1	1	2	2	1	2	1	1	2	1	1	2	2	涂中兴
XJ-B34	2014-01-14	1	53	1	3	2	1	3	2	#NULL!	1	3	2	1	1	1	1	3	3	3	3	2	2	1	2	2	1	1	2	2	2	1	3	2	2	1	3	3	2	陈丽华
QSH-B65	2014-01-14	2	53	1	1	2	4	1	2	#NULL!	1	4	3	1	1	1	1	1	1	1	1	1	2	2	2	1	1	2	2	2	2	1	3	1	1	1	1	1	2	郭金
214	2013-12-30	1	53	1	3	2	1	4	2	#NULL!	1	5	1	3	3	1	1	3	3	3	3	3	3	1	1	1	1	2	1	2	1	2	4	1	2	1	1	2	2	彭时辉
QSH-B14	2014-01-13	2	54	1	1	2	5	1	2	#NULL!	2	#NULL!	1	1	1	1	1	3	2	2	2	2	2	#NULL!	#NULL!	#NULL!	#NULL!	#NULL!	#NULL!	#NULL!	#NULL!	#NULL!	2	#NULL!	#NULL!	1	1	2	2	章文华
QSH-B32	2014-01-14	2	54	#NULL!	1	2	6	1	#NULL!	#NULL!	2	#NULL!	1	2	1	1	1	1	1	1	1	3	3	#NULL!	#NULL!	#NULL!	#NULL!	#NULL!	#NULL!	#NULL!	#NULL!	#NULL!	2	#NULL!	#NULL!	1	1	1	2	吴海亮
QYP-B8	2014-01-14	2	54	1	2	2	5	3	2	#NULL!	2	#NULL!	3	1	1	1	1	1	1	1	1	1	1	#NULL!	#NULL!	#NULL!	#NULL!	#NULL!	#NULL!	#NULL!	#NULL!	#NULL!	2	#NULL!	#NULL!	1	1	1	2	吴海亮
QYP-B30	2014-01-14	1	54	1	4	2	9	#NULL!	2	#NULL!	2	#NULL!	2	1	1	1	1	1	1	2	1	2	3	#NULL!	#NULL!	#NULL!	#NULL!	#NULL!	#NULL!	#NULL!	#NULL!	#NULL!	2	#NULL!	#NULL!	1	1	1	2	章文华
QYP-B70	2014-01-17	2	54	1	4	2	9	1	2	#NULL!	2	#NULL!	1	1	1	3	1	1	1	2	2	2	2	#NULL!	#NULL!	#NULL!	#NULL!	#NULL!	#NULL!	#NULL!	#NULL!	#NULL!	3	#NULL!	#NULL!	1	1	1	2	邓云兰
AYX-B6	2014-01-10	2	54	1	2	2	1	1	2	#NULL!	2	#NULL!	1	1	1	1	1	1	1	1	1	2	2	#NULL!	#NULL!	#NULL!	#NULL!	#NULL!	#NULL!	#NULL!	#NULL!	#NULL!	3	#NULL!	#NULL!	1	1	2	2	肖芸
AYX-B25	2014-01-10	1	54	1	2	1	1	1	2	#NULL!	2	#NULL!	3	1	1	2	1	1	1	1	1	1	1	#NULL!	#NULL!	#NULL!	#NULL!	#NULL!	#NULL!	#NULL!	#NULL!	#NULL!	1	#NULL!	#NULL!	1	1	2	2	杨昌林
XJ-B42	2014-01-14	1	54	1	3	2	9	#NULL!	2	#NULL!	1	1	2	1	1	1	1	1	1	1	1	1	3	2	2	2	1	1	2	2	1	2	1	2	2	1	1	2	2	凌荣明
230	2013-12-30	1	54	1	3	2	1	2	2	#NULL!	1	1	1	3	3	3	3	3	3	3	3	3	3	1	1	1	1	2	1	2	1	2	4	1	2	3	3	2	2	彭时辉
DH-B17	2014-01-13	1	54	1	4	2	4	1	2	#NULL!	1	2	1	1	1	1	1	1	1	2	1	3	2	2	2	2	2	#NULL!	2	2	2	2	3	2	2	1	1	2	2	朱春芳
DH-B48	2014-01-14	1	54	1	2	2	4	1	2	#NULL!	1	2	2	1	1	1	1	1	1	1	1	1	3	2	2	1	1	1	2	2	2	2	1	1	2	1	1	2	2	朱春芳
XJ-B17	2014-01-14	1	54	1	2	1	9	3	2	#NULL!	1	3	2	1	1	1	3	3	3	3	3	3	3	1	2	2	1	1	2	2	1	2	3	1	2	1	3	3	2	凌荣明
409	2013-12-31	1	54	1	2	2	6	3	2	#NULL!	1	4	2	1	1	3	1	3	1	3	1	1	3	2	2	2	2	#NULL!	2	2	1	2	2	1	1	1	1	4	2	郭双莉
QYP-B49	2014-01-15	2	54	1	1	2	4	1	2	#NULL!	1	5	3	3	3	3	3	3	3	3	3	3	3	2	2	2	2	#NULL!	2	2	1	1	1	2	2	3	3	4	2	张莉
DH-B67	2014-01-14	2	55	1	2	#NULL!	4	1	2	#NULL!	2	#NULL!	2	1	1	1	1	1	1	3	1	2	3	#NULL!	#NULL!	#NULL!	#NULL!	#NULL!	#NULL!	#NULL!	#NULL!	#NULL!	1	#NULL!	#NULL!	1	1	2	2	龙强
DH-B68	2014-01-14	2	55	1	2	2	4	1	2	#NULL!	2	#NULL!	1	1	1	1	1	1	1	1	1	1	1	#NULL!	#NULL!	#NULL!	#NULL!	#NULL!	#NULL!	#NULL!	#NULL!	#NULL!	1	#NULL!	#NULL!	1	1	1	2	龙强
DH-B090	2014-01-14	1	55	1	2	2	6	1	2	#NULL!	2	#NULL!	1	1	1	1	1	1	1	2	3	1	2	#NULL!	#NULL!	#NULL!	#NULL!	#NULL!	#NULL!	#NULL!	#NULL!	#NULL!	1	#NULL!	#NULL!	1	2	2	2	龙强
DH-B124	2014-01-13	2	55	1	1	2	7	1	2	#NULL!	2	#NULL!	1	1	1	1	1	1	1	1	1	3	3	#NULL!	#NULL!	#NULL!	#NULL!	#NULL!	#NULL!	#NULL!	#NULL!	#NULL!	1	#NULL!	#NULL!	1	1	2	2	郭艳萍
XH-B26	2014-01-14	2	55	1	1	2	1	2	2	#NULL!	2	#NULL!	1	1	1	1	1	1	1	1	1	3	3	#NULL!	#NULL!	#NULL!	#NULL!	#NULL!	#NULL!	#NULL!	#NULL!	#NULL!	1	#NULL!	#NULL!	3	3	2	2	兰彪
XH-B083	2014-01-10	1	55	1	2	2	4	2	2	#NULL!	2	#NULL!	1	1	3	3	1	1	1	1	1	3	2	#NULL!	#NULL!	#NULL!	#NULL!	#NULL!	#NULL!	#NULL!	#NULL!	#NULL!	4	#NULL!	#NULL!	3	3	4	2	兰彪
AYX-B30	2014-01-10	2	55	1	3	1	2	2	2	#NULL!	2	#NULL!	3	1	1	1	1	1	1	1	1	1	1	#NULL!	#NULL!	#NULL!	#NULL!	#NULL!	#NULL!	#NULL!	#NULL!	#NULL!	2	#NULL!	#NULL!	1	1	2	2	杨昌林
DH-B4	2014-01-12	1	55	1	3	2	1	2	2	#NULL!	1	1	1	1	1	1	1	1	1	1	1	1	1	2	2	2	1	1	2	2	1	2	4	1	2	1	1	2	2	朱春芳
DH-B121	2014-01-12	1	55	1	2	2	5	1	2	#NULL!	1	1	1	1	1	1	1	1	3	3	3	3	1	2	2	2	2	#NULL!	2	2	2	2	1	2	2	1	1	2	2	郭艳萍
XH-B35	2014-01-14	#NULL!	55	1	2	2	9	1	1	#NULL!	1	1	3	3	3	3	3	3	3	3	3	3	3	2	2	1	1	1	1	2	1	2	2	1	1	1	1	2	2	王蓉
XH-B090	2014-01-11	1	55	1	3	2	5	2	2	#NULL!	1	1	1	1	1	3	3	1	3	3	3	3	3	2	2	2	1	1	2	2	1	1	2	1	1	1	1	2	2	王蓉
XH-B120	2014-01-12	2	55	1	3	2	7	3	2	#NULL!	1	1	1	1	1	1	1	1	1	1	1	1	2	2	2	2	2	#NULL!	2	2	2	2	1	1	1	1	1	2	2	兰彪
QSH-B56	2014-01-14	2	55	1	2	2	1	2	2	#NULL!	1	1	1	1	1	1	1	1	1	1	1	2	3	2	2	1	1	2	1	1	1	2	4	1	1	1	1	2	2	杨玲玲
QSH-B57	2014-01-14	2	55	1	2	2	4	1	2	#NULL!	1	1	2	1	1	1	1	1	1	1	1	1	1	1	1	1	1	1	1	1	1	1	4	3	2	1	1	2	2	魏桂英
QSH-B58	2014-01-14	2	55	1	4	2	4	1	2	#NULL!	1	1	1	1	1	1	1	2	1	1	1	3	1	1	1	1	1	2	2	2	1	1	1	1	1	1	1	1	2	杨玲玲
QYP-B46	2014-01-15	2	55	1	4	2	7	1	2	#NULL!	1	1	1	1	1	1	1	1	1	1	1	2	2	2	2	1	1	2	2	2	1	2	1	2	1	1	1	2	2	李洪玲
WL-B38	2014-01-14	2	55	1	4	2	8	3	2	#NULL!	1	1	1	3	3	1	1	1	1	1	1	1	2	2	2	2	2	#NULL!	2	2	2	2	4	1	1	3	3	2	2	汪玮
XJ-B23	2014-01-14	1	55	1	2	#NULL!	4	2	2	#NULL!	1	1	1	1	1	1	1	1	1	1	1	1	2	2	2	2	1	1	2	2	1	2	1	2	2	1	1	1	2	陈丽华
XH-B10	2014-01-14	2	55	1	2	2	9	1	2	#NULL!	1	4	3	1	1	1	3	1	3	3	3	3	3	2	2	2	2	#NULL!	2	2	1	2	1	1	1	1	1	2	2	叶松
XH-B36	2014-01-14	2	55	1	2	#NULL!	4	1	2	#NULL!	1	4	1	1	3	3	3	1	3	3	3	3	3	2	1	1	1	1	2	2	1	1	1	1	1	1	1	1	2	叶松
XH-B123	2014-01-12	2	55	1	2	2	4	1	2	#NULL!	1	4	2	1	1	1	1	1	1	1	1	3	2	2	2	2	2	#NULL!	2	2	2	2	2	1	1	1	1	2	2	兰彪
DH-B120	2014-01-12	2	56	1	2	2	1	1	2	#NULL!	2	#NULL!	2	1	1	3	1	1	3	3	3	3	3	#NULL!	#NULL!	#NULL!	#NULL!	#NULL!	#NULL!	#NULL!	#NULL!	#NULL!	1	#NULL!	#NULL!	1	1	2	2	郭艳萍
XHQ-B170	2014-01-13	2	56	1	2	2	10	1	2	#NULL!	2	#NULL!	1	1	1	1	1	1	1	1	1	1	3	#NULL!	#NULL!	#NULL!	#NULL!	#NULL!	#NULL!	#NULL!	#NULL!	#NULL!	4	#NULL!	#NULL!	3	3	4	2	胡玉城
QSH-B36	2014-01-14	1	56	#NULL!	2	2	1	1	2	#NULL!	2	#NULL!	1	1	1	1	1	2	2	2	2	2	2	#NULL!	#NULL!	#NULL!	#NULL!	#NULL!	#NULL!	#NULL!	#NULL!	#NULL!	2	#NULL!	#NULL!	1	1	2	2	蔡丹桃
QYP-B44	2014-01-14	1	56	1	3	1	1	1	2	#NULL!	2	#NULL!	1	2	1	1	1	1	1	1	1	1	1	#NULL!	#NULL!	#NULL!	#NULL!	#NULL!	#NULL!	#NULL!	#NULL!	#NULL!	1	#NULL!	#NULL!	1	1	1	2	张莉
HGT-B12	2014-01-14	2	56	1	1	2	10	1	2	#NULL!	2	#NULL!	1	1	1	3	3	3	2	2	2	2	2	#NULL!	#NULL!	#NULL!	#NULL!	#NULL!	#NULL!	#NULL!	#NULL!	#NULL!	2	#NULL!	#NULL!	1	1	1	2	路亮
AYX-B1	2014-01-10	2	56	1	2	2	1	3	2	#NULL!	2	#NULL!	3	1	1	1	1	1	1	1	1	1	2	#NULL!	#NULL!	#NULL!	#NULL!	#NULL!	#NULL!	#NULL!	#NULL!	#NULL!	3	#NULL!	#NULL!	1	1	2	2	杨昌林
418	2013-12-31	2	56	1	2	2	4	2	2	#NULL!	2	#NULL!	1	1	1	1	1	2	2	2	2	2	2	#NULL!	#NULL!	#NULL!	#NULL!	#NULL!	#NULL!	#NULL!	#NULL!	#NULL!	1	#NULL!	#NULL!	2	2	3	2	郭双莉
DH-B099	2014-01-14	2	56	1	1	2	5	3	2	#NULL!	1	1	1	1	1	1	2	1	1	1	1	1	2	2	2	2	2	#NULL!	2	2	2	2	1	2	1	1	2	2	2	龙强
XH-B05	2014-01-14	2	56	1	4	1	6	3	2	#NULL!	1	1	1	1	1	3	1	3	3	3	3	3	3	2	1	1	1	2	1	2	1	2	2	1	1	1	1	2	2	兰彪
XH-B23	2014-01-14	2	56	1	2	2	9	1	2	#NULL!	1	1	2	1	1	1	1	1	1	1	1	1	1	2	2	2	2	#NULL!	2	2	2	2	4	1	2	1	1	#NULL!	2	兰彪
XH-B107	2014-01-12	1	56	1	4	2	9	3	2	#NULL!	1	1	2	1	1	1	1	1	1	1	1	2	2	2	2	1	1	2	2	2	1	1	3	1	1	1	1	2	2	兰彪
XH-B112	2014-01-12	1	56	1	2	1	1	2	2	#NULL!	1	1	1	1	1	1	1	1	1	1	1	2	2	2	1	2	2	#NULL!	2	2	2	2	2	1	1	1	1	2	2	兰彪
WL-B22	2014-01-14	2	56	1	3	2	5	2	2	#NULL!	1	1	1	2	1	1	1	1	2	2	1	1	1	1	2	1	1	1	2	2	1	2	2	1	1	1	2	1	2	饶裕莲
XJ-B9	2014-01-14	1	56	1	3	2	9	2	2	#NULL!	1	1	1	1	1	1	1	1	1	1	1	3	1	2	2	2	1	1	2	2	2	2	4	3	2	1	1	2	2	凌荣明
DH-B65	2014-01-14	1	56	1	3	2	4	1	2	#NULL!	1	2	2	1	1	1	1	1	1	1	1	1	1	2	2	1	1	1	2	2	2	2	1	1	1	1	1	2	2	龙强
DH-B144	2014-01-14	1	56	1	3	2	5	1	2	#NULL!	1	2	1	1	1	1	1	1	1	1	1	1	3	2	2	1	1	1	2	2	1	2	1	1	1	1	1	2	2	郭艳萍
XJX-B085	2014-01-14	1	56	1	3	2	6	2	2	#NULL!	1	2	2	1	1	1	1	1	1	1	1	1	3	2	2	2	1	1	2	2	1	2	3	2	2	1	1	2	2	谢玉庆
68	2013-12-29	2	56	1	3	2	6	3	2	#NULL!	1	3	1	1	1	1	1	1	2	2	1	1	3	1	1	1	1	1	1	1	1	1	2	2	2	1	1	2	2	路亮
XH-B40	2014-01-14	1	56	1	2	2	9	1	2	#NULL!	1	4	1	3	3	3	3	3	3	3	3	3	3	2	1	1	1	1	1	2	1	2	4	1	1	1	1	4	2	胡玉城
XH-B131	2014-01-12	2	56	1	1	2	5	1	2	#NULL!	1	4	2	1	1	1	1	1	1	1	1	1	2	2	2	2	2	#NULL!	2	2	2	2	4	1	1	1	1	2	2	胡玉城
QYP-B41	2014-01-14	1	56	1	3	2	1	2	1	2	1	4	1	1	1	1	1	1	1	1	1	1	1	2	2	2	2	#NULL!	1	2	1	1	1	1	2	1	1	2	2	张莉
QYP-B57	2014-01-15	2	56	1	4	2	8	2	2	#NULL!	1	4	3	1	1	1	1	1	1	1	1	1	1	1	1	1	1	2	1	1	1	1	3	1	1	1	1	4	2	张莉
QYP-B51	2014-01-15	2	56	1	3	2	4	2	2	#NULL!	1	5	2	3	3	3	3	3	3	3	3	3	3	2	2	2	1	2	2	2	2	2	1	1	2	3	3	4	2	张莉
XH-B66	2014-01-14	1	57	1	3	2	6	2	2	#NULL!	2	#NULL!	1	1	3	1	1	1	1	1	1	3	1	#NULL!	#NULL!	#NULL!	#NULL!	#NULL!	#NULL!	#NULL!	#NULL!	#NULL!	1	#NULL!	#NULL!	1	1	2	2	王蓉
XH-B69	2014-01-14	1	57	1	3	2	1	3	2	#NULL!	2	#NULL!	1	1	1	1	1	1	1	1	1	2	2	#NULL!	#NULL!	#NULL!	#NULL!	#NULL!	#NULL!	#NULL!	#NULL!	#NULL!	1	#NULL!	#NULL!	1	1	2	2	王蓉
QSH-B64	2014-01-14	1	57	1	2	2	4	1	2	#NULL!	2	#NULL!	2	1	3	1	3	3	1	3	3	3	3	#NULL!	#NULL!	#NULL!	#NULL!	#NULL!	#NULL!	#NULL!	#NULL!	#NULL!	2	#NULL!	#NULL!	3	3	1	2	郭金
QYP-B66	2014-01-17	1	57	1	2	2	1	3	2	#NULL!	2	#NULL!	2	1	1	1	1	1	1	1	1	1	1	#NULL!	#NULL!	#NULL!	#NULL!	#NULL!	#NULL!	#NULL!	#NULL!	#NULL!	3	#NULL!	#NULL!	1	1	1	2	吴海亮
WL-B15	2014-01-14	2	57	1	1	2	10	1	2	#NULL!	2	#NULL!	2	1	3	2	1	1	1	1	1	2	3	#NULL!	#NULL!	#NULL!	#NULL!	#NULL!	#NULL!	#NULL!	#NULL!	#NULL!	2	#NULL!	#NULL!	3	2	2	2	饶裕莲
WL-B40	2014-01-14	2	57	1	2	2	10	1	2	#NULL!	2	#NULL!	1	3	3	1	1	1	3	3	3	3	3	#NULL!	#NULL!	#NULL!	#NULL!	#NULL!	#NULL!	#NULL!	#NULL!	#NULL!	2	#NULL!	#NULL!	1	1	1	2	饶裕莲
AYX-B27	2014-01-10	2	57	1	2	2	4	2	2	#NULL!	2	#NULL!	2	1	1	1	1	1	1	1	1	1	1	#NULL!	#NULL!	#NULL!	#NULL!	#NULL!	#NULL!	#NULL!	#NULL!	#NULL!	2	#NULL!	#NULL!	1	1	2	2	杨昌林
219	2013-12-30	1	57	1	2	2	1	2	2	#NULL!	2	#NULL!	1	3	3	3	3	3	3	3	3	3	3	#NULL!	#NULL!	#NULL!	#NULL!	#NULL!	#NULL!	#NULL!	#NULL!	#NULL!	4	#NULL!	#NULL!	3	3	2	2	彭时辉
XH-B29	2014-01-14	1	57	1	4	2	1	1	2	#NULL!	1	1	3	1	1	1	1	1	1	1	1	1	1	2	2	1	1	#NULL!	2	2	1	2	1	1	3	1	1	1	2	叶松
XH-B101	2014-01-12	2	57	1	5	2	9	3	2	#NULL!	1	1	1	1	1	1	1	1	1	1	1	2	2	2	2	2	1	2	2	2	2	2	3	1	1	1	1	2	2	王蓉
XH-B156	2014-01-13	1	57	1	3	#NULL!	4	1	2	#NULL!	1	1	1	3	1	1	1	3	3	3	3	3	3	2	1	1	1	1	1	2	2	2	4	1	1	1	1	4	2	叶松
XJ-B1	2014-01-14	1	57	1	2	1	4	2	2	#NULL!	1	1	1	1	1	1	1	3	3	3	3	2	2	1	2	2	1	1	2	2	1	2	2	1	2	1	3	3	2	陈丽华
XJ-B8	2014-01-14	1	57	1	3	2	9	1	2	#NULL!	1	1	1	1	1	1	1	3	3	1	3	2	2	1	2	2	1	#NULL!	2	2	1	2	2	1	2	1	3	#NULL!	2	陈丽华
XJ-B20	2014-01-14	2	57	1	2	2	9	1	2	#NULL!	1	1	1	1	1	1	1	1	1	1	1	1	3	2	2	2	1	2	2	2	1	2	3	1	2	1	1	1	2	凌荣明
XJ-B37	2014-01-14	1	57	1	1	2	1	#NULL!	2	#NULL!	1	1	2	1	1	1	1	1	1	1	1	1	2	2	2	2	1	1	2	2	2	2	3	1	2	1	1	2	2	凌荣明
2	2013-12-30	1	57	1	2	2	1	2	1	2	1	1	2	1	1	1	1	1	1	1	1	1	1	2	2	1	1	1	1	1	1	1	2	1	1	1	1	2	2	路亮
XH-B105	2014-01-12	2	57	1	2	#NULL!	6	1	2	#NULL!	1	4	1	1	3	3	3	1	1	3	3	3	3	2	2	2	2	#NULL!	2	2	2	2	2	1	1	1	1	1	2	胡玉城
QYP-B43	2014-01-14	2	57	1	2	2	1	2	1	2	1	4	1	1	1	1	1	1	1	1	1	1	1	2	2	2	1	2	1	2	1	1	1	1	2	1	1	2	2	张莉
QSH-B45	2014-01-14	2	57	1	3	2	1	1	2	#NULL!	1	5	1	1	1	1	1	1	2	2	2	3	2	2	2	2	2	#NULL!	2	2	1	2	1	3	2	1	1	1	2	蔡丹桃
DH-B094	2014-01-14	2	58	1	2	2	6	1	2	#NULL!	2	#NULL!	1	1	1	1	1	1	1	1	1	1	2	#NULL!	#NULL!	#NULL!	#NULL!	#NULL!	#NULL!	#NULL!	#NULL!	#NULL!	2	#NULL!	#NULL!	1	2	2	2	龙强
QSH-B61	2014-01-14	1	58	1	3	1	9	1	2	#NULL!	2	#NULL!	1	1	1	1	1	3	3	2	2	2	2	#NULL!	#NULL!	#NULL!	#NULL!	#NULL!	#NULL!	#NULL!	#NULL!	#NULL!	3	#NULL!	#NULL!	1	1	1	2	杨玲玲
131	2013-12-30	1	58	1	3	2	3	2	2	#NULL!	2	#NULL!	1	1	1	1	1	1	1	1	1	1	1	#NULL!	#NULL!	#NULL!	#NULL!	#NULL!	#NULL!	#NULL!	#NULL!	#NULL!	2	#NULL!	#NULL!	1	1	2	2	彭时辉
78	2013-12-29	2	58	1	#NULL!	2	1	1	1	1	2	#NULL!	1	1	1	1	3	2	2	2	2	2	2	#NULL!	#NULL!	#NULL!	#NULL!	#NULL!	#NULL!	#NULL!	#NULL!	#NULL!	2	#NULL!	#NULL!	1	1	2	2	路亮
14	2013-12-30	2	58	1	3	1	3	1	#NULL!	#NULL!	2	#NULL!	1	1	1	1	1	1	1	1	1	1	1	#NULL!	#NULL!	#NULL!	#NULL!	#NULL!	#NULL!	#NULL!	#NULL!	#NULL!	3	#NULL!	#NULL!	1	1	1	2	路亮
DH-B29	2014-01-14	1	58	1	3	2	5	1	2	#NULL!	1	1	1	1	1	1	1	1	1	1	1	1	1	2	2	1	1	1	2	2	1	2	1	2	2	1	1	2	2	朱春芳
XH-B37	2014-01-14	1	58	1	#NULL!	#NULL!	2	#NULL!	2	#NULL!	1	1	1	3	3	3	3	3	3	3	3	3	3	2	2	1	1	1	2	2	1	2	3	1	1	1	1	4	2	王蓉
XH-B143	2014-01-13	1	58	1	1	#NULL!	4	1	2	#NULL!	1	1	1	1	1	3	3	1	3	3	3	3	3	2	2	2	2	#NULL!	2	2	2	2	1	1	1	1	1	2	2	王蓉
XH-B151	2014-01-13	2	58	1	3	#NULL!	1	1	2	#NULL!	1	1	1	1	3	3	3	1	3	3	3	3	3	1	1	1	1	1	2	1	1	1	1	1	1	1	1	1	2	熊楚妮
HGT-B09	2014-01-14	2	58	1	3	2	1	2	2	#NULL!	1	1	2	2	1	1	1	1	2	2	2	1	2	1	2	1	1	2	1	1	1	1	2	2	2	1	1	1	2	路亮
XJ-B24	2014-01-14	2	58	1	2	2	4	2	2	#NULL!	1	1	1	1	1	1	3	3	3	3	3	2	2	1	2	2	1	1	2	2	1	2	2	1	2	1	3	3	2	陈丽华
XJ-B41	2014-01-14	2	58	1	2	2	1	3	2	#NULL!	1	1	1	1	1	1	1	3	3	3	3	2	2	1	2	2	1	1	2	2	1	2	2	2	2	1	3	2	2	陈丽华
223	2013-12-30	1	58	1	4	1	5	3	2	#NULL!	1	1	2	3	3	3	3	3	3	3	3	3	3	2	2	2	1	2	1	2	1	2	4	1	2	1	3	2	2	郭双莉
421	2013-12-31	2	58	1	2	2	5	1	2	#NULL!	1	1	1	1	1	2	1	1	3	3	3	3	2	1	1	1	1	2	1	1	1	1	1	1	1	1	1	4	2	郭双莉
DH-B34	2014-01-14	2	58	1	1	#NULL!	5	1	2	#NULL!	1	2	2	1	1	1	1	1	1	1	1	3	2	2	2	1	1	1	2	2	1	2	2	1	2	1	1	2	2	朱春芳
DH-B3	2014-01-12	1	59	1	2	2	1	2	2	#NULL!	2	#NULL!	1	3	1	3	3	1	3	3	3	3	3	#NULL!	#NULL!	#NULL!	#NULL!	#NULL!	#NULL!	#NULL!	#NULL!	#NULL!	1	#NULL!	#NULL!	1	1	2	2	朱春芳
DH-B20	2014-01-13	1	59	1	1	2	5	1	2	#NULL!	2	#NULL!	1	1	1	1	1	1	1	1	1	3	1	#NULL!	#NULL!	#NULL!	#NULL!	#NULL!	#NULL!	#NULL!	#NULL!	#NULL!	1	#NULL!	#NULL!	1	1	2	2	朱春芳
DH-B123	2014-01-12	1	59	1	2	2	5	1	2	#NULL!	2	#NULL!	2	1	1	3	1	1	1	1	3	2	3	#NULL!	#NULL!	#NULL!	#NULL!	#NULL!	#NULL!	#NULL!	#NULL!	#NULL!	1	#NULL!	#NULL!	1	1	2	2	郭艳萍
XH-B147	2014-01-13	2	59	1	1	#NULL!	1	1	2	#NULL!	2	#NULL!	1	2	3	3	3	1	3	3	3	3	3	#NULL!	#NULL!	#NULL!	#NULL!	#NULL!	#NULL!	#NULL!	#NULL!	#NULL!	1	#NULL!	#NULL!	1	1	4	2	王蓉
XHQ-B168	2014-01-13	1	59	1	2	2	5	1	2	#NULL!	2	#NULL!	1	1	1	1	1	1	1	1	1	3	3	#NULL!	#NULL!	#NULL!	#NULL!	#NULL!	#NULL!	#NULL!	#NULL!	#NULL!	1	#NULL!	#NULL!	3	3	4	2	兰彪
QYP-B100	2014-01-13	2	59	1	2	1	5	2	2	#NULL!	2	#NULL!	1	1	1	1	1	1	1	1	1	1	2	#NULL!	#NULL!	#NULL!	#NULL!	#NULL!	#NULL!	#NULL!	#NULL!	#NULL!	2	#NULL!	#NULL!	1	1	2	2	张莉
AYX-B10	2014-01-10	1	59	1	3	2	1	3	2	#NULL!	2	#NULL!	2	1	1	1	1	1	1	1	1	1	2	#NULL!	#NULL!	#NULL!	#NULL!	#NULL!	#NULL!	#NULL!	#NULL!	#NULL!	3	#NULL!	#NULL!	1	1	2	2	肖芸
DH-B18	2014-01-13	1	59	1	3	2	4	1	2	#NULL!	1	1	1	1	1	1	1	2	1	1	1	1	3	2	2	2	2	#NULL!	2	2	2	2	4	1	1	1	1	1	2	朱春芳
QSH-B41	2014-01-14	2	59	1	2	2	1	2	2	#NULL!	1	1	1	3	3	3	3	2	3	3	3	3	3	2	1	1	1	2	2	2	1	1	2	1	4	2	2	2	2	郭金
QSH-B63	2014-01-14	1	59	1	2	2	1	2	2	#NULL!	1	1	1	1	1	1	3	1	1	1	3	3	3	2	2	2	2	#NULL!	1	1	1	2	2	1	1	1	1	1	2	魏桂英
WL-B35	2014-01-14	1	59	1	2	2	10	1	2	#NULL!	1	1	1	3	3	1	1	1	3	3	3	3	3	2	2	2	2	#NULL!	2	2	2	2	2	1	1	1	1	2	2	饶裕莲
13	2013-12-29	2	59	1	1	2	1	1	1	1	1	1	1	2	1	1	1	2	2	2	2	2	2	1	1	1	1	2	1	1	1	1	1	1	2	1	1	2	2	路亮
XJX-B093	2014-01-14	1	59	1	3	2	1	2	2	#NULL!	1	2	2	1	1	1	1	1	1	1	1	1	3	2	2	2	1	1	2	2	1	2	3	1	1	1	1	2	2	涂中兴
XJX-B106	2014-01-14	1	59	1	3	2	5	2	2	#NULL!	1	2	1	1	1	1	1	1	1	1	1	1	3	2	2	2	1	1	2	2	1	2	3	1	2	1	1	2	2	涂中兴
XJX-B112	2014-01-14	1	59	1	4	2	9	2	2	#NULL!	1	2	1	1	1	1	1	1	1	1	1	1	2	2	2	2	1	1	2	2	1	2	2	1	2	1	1	2	2	涂中兴
202	2013-12-30	1	59	1	3	2	1	4	2	#NULL!	1	4	1	2	2	1	1	3	3	3	3	3	3	1	1	1	2	#NULL!	1	2	1	2	4	1	4	3	3	2	2	路亮
DH-B69	2014-01-14	2	60	1	1	#NULL!	4	1	2	#NULL!	2	#NULL!	1	1	1	1	1	1	1	1	1	2	3	#NULL!	#NULL!	#NULL!	#NULL!	#NULL!	#NULL!	#NULL!	#NULL!	#NULL!	2	#NULL!	#NULL!	1	1	1	2	龙强
DH-B74	2014-01-14	2	60	1	1	2	4	1	2	#NULL!	2	#NULL!	2	1	1	1	1	1	1	1	1	3	3	#NULL!	#NULL!	#NULL!	#NULL!	#NULL!	#NULL!	#NULL!	#NULL!	#NULL!	1	#NULL!	#NULL!	1	1	2	2	龙强
DH-B126	2014-01-13	1	60	1	2	2	7	1	2	#NULL!	2	#NULL!	1	1	1	1	1	1	1	1	1	1	3	#NULL!	#NULL!	#NULL!	#NULL!	#NULL!	#NULL!	#NULL!	#NULL!	#NULL!	1	#NULL!	#NULL!	1	1	2	2	郭艳萍
XH-B51	2014-01-14	2	60	1	2	2	9	1	2	#NULL!	2	#NULL!	#NULL!	3	1	1	3	1	3	1	1	1	3	#NULL!	#NULL!	#NULL!	#NULL!	#NULL!	#NULL!	#NULL!	#NULL!	#NULL!	4	#NULL!	#NULL!	1	1	2	2	王蓉
XH-B152	2014-01-13	2	60	1	2	#NULL!	6	1	2	#NULL!	2	#NULL!	1	1	3	3	3	1	3	3	3	3	3	#NULL!	#NULL!	#NULL!	#NULL!	#NULL!	#NULL!	#NULL!	#NULL!	#NULL!	1	#NULL!	#NULL!	1	1	4	2	王蓉
QYP-B88	2014-01-12	2	60	1	2	2	1	2	2	#NULL!	2	#NULL!	1	1	1	1	1	1	1	1	1	1	1	#NULL!	#NULL!	#NULL!	#NULL!	#NULL!	#NULL!	#NULL!	#NULL!	#NULL!	2	#NULL!	#NULL!	1	1	2	2	张莉
WL-B3	2014-01-14	2	60	1	1	1	10	1	2	#NULL!	2	#NULL!	2	3	1	3	1	1	3	1	1	3	3	#NULL!	#NULL!	#NULL!	#NULL!	#NULL!	#NULL!	#NULL!	#NULL!	#NULL!	2	#NULL!	#NULL!	3	3	2	2	饶裕莲
WL-B33	2014-01-14	2	60	1	1	2	6	1	2	#NULL!	2	#NULL!	1	1	2	3	2	3	3	3	1	2	3	#NULL!	#NULL!	#NULL!	#NULL!	#NULL!	#NULL!	#NULL!	#NULL!	#NULL!	2	#NULL!	#NULL!	3	3	2	2	饶裕莲
AYX-B26	2014-01-10	1	60	1	2	2	4	1	2	#NULL!	2	#NULL!	2	1	1	1	1	1	1	1	1	1	2	#NULL!	#NULL!	#NULL!	#NULL!	#NULL!	#NULL!	#NULL!	#NULL!	#NULL!	2	#NULL!	#NULL!	1	1	2	2	肖芸
AYX-B31	2014-01-10	1	60	1	2	2	4	1	2	#NULL!	2	#NULL!	1	1	1	1	1	1	1	1	1	1	2	#NULL!	#NULL!	#NULL!	#NULL!	#NULL!	#NULL!	#NULL!	#NULL!	#NULL!	2	#NULL!	#NULL!	1	1	2	2	肖芸
106	2013-12-30	1	60	1	2	2	1	1	2	#NULL!	1	#NULL!	1	1	1	1	1	2	2	2	2	2	2	2	2	2	2	#NULL!	2	2	1	2	3	1	1	1	1	2	2	郭双莉
410	2013-12-31	2	60	1	3	2	5	1	2	#NULL!	2	#NULL!	2	1	1	1	1	2	2	2	2	2	2	#NULL!	#NULL!	#NULL!	#NULL!	#NULL!	#NULL!	#NULL!	#NULL!	#NULL!	4	#NULL!	#NULL!	3	3	2	2	郭双莉
DH-B30	2014-01-14	2	60	1	1	2	6	1	2	#NULL!	1	1	1	1	1	1	1	1	1	1	1	1	2	2	2	1	1	1	2	2	2	2	4	1	2	1	1	2	2	朱春芳
XH-B25	2014-01-14	2	60	1	1	2	1	2	2	#NULL!	1	1	1	3	3	1	3	1	1	1	1	1	3	2	2	1	1	1	2	2	1	2	1	1	1	1	1	2	2	叶松
XH-B089	2014-01-12	2	60	1	3	2	6	1	2	#NULL!	1	1	2	1	1	1	1	1	1	2	2	2	1	2	1	1	1	2	1	2	1	1	3	1	1	1	1	4	2	叶松
XJ-B2	2014-01-14	1	60	1	3	2	9	2	2	#NULL!	1	1	1	1	1	1	1	1	1	1	1	3	3	2	2	2	1	1	2	2	1	2	1	1	2	1	1	2	2	凌荣明
XJ-B70	2014-01-14	2	60	1	1	#NULL!	5	1	2	#NULL!	1	1	1	1	1	1	1	3	2	3	3	3	3	1	1	1	2	#NULL!	2	2	1	2	1	2	2	1	3	3	2	谢玉兰
XJ-B14	2014-01-14	1	60	1	2	2	9	#NULL!	2	#NULL!	1	2	3	1	1	1	1	1	1	1	1	1	3	2	2	2	1	1	2	2	1	2	2	1	2	1	1	2	2	凌荣明
QYP-B45	2014-01-15	2	60	1	3	2	7	2	2	#NULL!	1	4	2	1	1	1	1	#NULL!	#NULL!	#NULL!	#NULL!	#NULL!	#NULL!	1	2	2	1	2	1	2	1	1	1	1	1	1	1	1	2	张莉
XH-B32	2014-01-14	1	60	1	2	2	1	1	2	#NULL!	1	5	1	3	3	1	3	3	3	3	3	3	3	2	2	2	2	#NULL!	2	2	1	2	4	1	1	1	1	3	2	叶松
XHQ-B164	2014-01-13	2	61	1	2	2	7	2	2	#NULL!	2	#NULL!	1	1	1	1	1	1	1	1	1	3	2	#NULL!	#NULL!	#NULL!	#NULL!	#NULL!	#NULL!	#NULL!	#NULL!	#NULL!	1	#NULL!	#NULL!	1	1	4	2	兰彪
QYP-B22	2014-01-14	2	61	1	1	2	4	1	2	#NULL!	2	#NULL!	2	1	3	1	1	1	3	3	3	2	2	#NULL!	#NULL!	#NULL!	#NULL!	#NULL!	#NULL!	#NULL!	#NULL!	#NULL!	1	#NULL!	#NULL!	1	1	2	2	周军华
AYX-B12	2014-01-10	1	61	1	2	2	1	2	2	#NULL!	2	#NULL!	2	1	1	1	1	1	1	1	1	1	1	#NULL!	#NULL!	#NULL!	#NULL!	#NULL!	#NULL!	#NULL!	#NULL!	#NULL!	3	#NULL!	#NULL!	1	1	2	2	杨昌林
AYX-B42	2014-01-13	2	61	1	1	2	6	1	2	#NULL!	2	#NULL!	1	1	1	1	1	1	2	2	1	2	2	#NULL!	#NULL!	#NULL!	#NULL!	#NULL!	#NULL!	#NULL!	#NULL!	#NULL!	3	#NULL!	#NULL!	1	1	2	2	肖芸
DH-B109	2014-01-14	2	61	1	2	2	9	1	2	#NULL!	1	1	1	1	1	1	2	1	2	2	2	2	2	2	2	2	2	#NULL!	2	1	2	2	2	2	1	1	2	2	2	郭艳萍
DH-B127	2014-01-13	2	62	1	2	2	5	1	2	#NULL!	2	#NULL!	1	1	1	1	1	1	1	1	1	3	3	#NULL!	#NULL!	#NULL!	#NULL!	#NULL!	#NULL!	#NULL!	#NULL!	#NULL!	4	#NULL!	#NULL!	1	1	2	2	郭艳萍
XH-B106	2014-01-12	2	62	1	2	2	5	1	2	#NULL!	2	#NULL!	2	1	1	1	3	1	3	3	3	3	3	#NULL!	#NULL!	#NULL!	#NULL!	#NULL!	#NULL!	#NULL!	#NULL!	#NULL!	4	#NULL!	#NULL!	1	1	2	2	兰彪
QSH-B16	2014-01-13	2	62	#NULL!	2	2	9	1	2	#NULL!	2	#NULL!	1	1	1	1	1	1	3	3	3	3	2	#NULL!	#NULL!	#NULL!	#NULL!	#NULL!	#NULL!	#NULL!	#NULL!	#NULL!	2	#NULL!	#NULL!	1	1	2	2	郭金
QSH-B37	2014-01-14	2	62	#NULL!	1	2	1	1	2	#NULL!	2	#NULL!	1	2	2	1	1	3	2	2	2	2	2	#NULL!	#NULL!	#NULL!	#NULL!	#NULL!	#NULL!	#NULL!	#NULL!	#NULL!	3	#NULL!	#NULL!	1	1	2	2	郭金
QYP-B90	2014-01-12	2	62	1	1	2	3	1	2	#NULL!	2	#NULL!	1	1	1	1	1	1	1	1	1	1	1	#NULL!	#NULL!	#NULL!	#NULL!	#NULL!	#NULL!	#NULL!	#NULL!	#NULL!	1	#NULL!	#NULL!	1	1	2	2	李洪玲
QYP-B91	2014-01-12	2	62	1	2	2	4	1	2	#NULL!	2	#NULL!	1	1	1	1	1	1	1	1	1	1	1	#NULL!	#NULL!	#NULL!	#NULL!	#NULL!	#NULL!	#NULL!	#NULL!	#NULL!	2	#NULL!	#NULL!	1	1	1	2	李洪玲
WL-B26	2014-01-14	2	62	1	2	2	10	1	2	#NULL!	2	#NULL!	3	1	1	3	1	1	1	3	3	3	3	#NULL!	#NULL!	#NULL!	#NULL!	#NULL!	#NULL!	#NULL!	#NULL!	#NULL!	2	#NULL!	#NULL!	1	3	2	2	汪玮
411	2013-12-31	2	62	1	1	2	6	1	2	#NULL!	2	#NULL!	1	3	3	2	1	2	3	3	3	2	2	#NULL!	#NULL!	#NULL!	#NULL!	#NULL!	#NULL!	#NULL!	#NULL!	#NULL!	1	#NULL!	#NULL!	1	1	1	2	郭双莉
XH-B136	2014-01-13	2	62	1	1	2	4	1	2	#NULL!	1	1	2	1	1	1	3	3	3	3	3	3	3	2	2	2	2	#NULL!	2	2	1	1	4	1	1	1	1	2	2	熊楚妮
XH-B144	2014-01-13	1	62	1	3	2	1	2	2	#NULL!	1	1	1	3	3	3	3	3	3	3	3	3	3	2	1	1	1	1	2	2	2	1	2	1	1	1	1	4	2	叶松
XHQ-B163	2014-01-13	1	62	1	3	2	5	3	2	#NULL!	1	1	2	1	1	1	1	1	1	1	1	3	1	2	1	1	1	1	2	2	1	2	1	1	1	1	1	4	2	胡玉城
XJ-B4	2014-01-14	2	62	1	2	#NULL!	9	1	2	#NULL!	1	1	1	1	1	1	3	3	3	3	3	2	2	1	2	2	1	1	2	2	1	2	2	1	2	1	3	3	2	陈丽华
XJ-B5	2014-01-14	1	62	1	2	1	9	1	2	#NULL!	1	1	2	1	1	1	3	3	3	3	3	2	2	1	2	2	1	1	2	2	1	2	2	1	2	1	3	3	2	凌荣明
XJ-B10	2014-01-14	1	62	1	3	2	9	1	2	#NULL!	1	1	1	1	1	1	3	3	3	3	3	2	3	1	2	2	1	1	2	2	1	2	2	1	2	1	3	3	2	陈丽华
XJ-B13	2014-01-14	1	62	1	2	2	9	3	2	#NULL!	1	1	1	1	1	1	1	3	3	3	3	3	3	1	2	2	1	#NULL!	2	2	1	2	3	1	2	1	3	3	2	陈丽华
XJ-B3	2014-01-14	1	62	1	2	1	9	1	2	#NULL!	1	3	1	1	1	1	1	3	3	3	2	2	2	1	2	2	1	1	2	2	1	2	2	1	2	1	3	3	2	陈丽华
XH-B100	2014-01-12	2	62	1	2	1	9	1	2	#NULL!	1	4	1	1	3	1	3	1	3	3	3	3	3	2	2	2	2	#NULL!	2	2	2	2	4	1	1	1	1	2	2	王蓉
DH-B66	2014-01-14	2	63	1	3	2	6	1	2	#NULL!	2	#NULL!	1	1	1	1	1	1	3	1	1	1	3	#NULL!	#NULL!	#NULL!	#NULL!	#NULL!	#NULL!	#NULL!	#NULL!	#NULL!	1	#NULL!	#NULL!	1	1	2	2	龙强
WL-B16	2014-01-14	2	63	1	1	2	9	1	2	#NULL!	2	#NULL!	3	3	3	3	3	1	3	3	3	3	3	#NULL!	#NULL!	#NULL!	#NULL!	#NULL!	#NULL!	#NULL!	#NULL!	#NULL!	2	#NULL!	#NULL!	3	3	3	2	肖超广
XJX-B104	2014-01-14	2	63	1	3	2	7	2	2	#NULL!	1	2	2	1	1	1	1	1	1	1	1	1	3	2	2	2	1	2	2	2	1	2	2	2	2	1	1	2	2	涂中兴
XJX-B119	2014-01-14	1	63	1	2	2	9	#NULL!	2	#NULL!	1	2	1	1	1	1	1	1	1	1	1	1	3	2	2	2	1	1	2	2	1	2	4	1	1	1	1	2	2	涂中兴
XH-B54	2014-01-14	1	64	1	2	2	9	#NULL!	2	#NULL!	2	#NULL!	#NULL!	3	3	3	3	3	3	3	3	3	3	#NULL!	#NULL!	#NULL!	#NULL!	#NULL!	#NULL!	#NULL!	#NULL!	#NULL!	1	#NULL!	#NULL!	2	1	3	2	胡玉城
XJ-B11	2014-01-14	2	64	1	2	2	9	3	2	#NULL!	1	1	1	1	1	1	3	3	3	3	3	2	3	1	2	2	1	1	2	1	1	2	2	1	2	1	3	3	2	陈丽华
XJX-B111	2014-01-14	1	64	1	4	2	9	2	2	#NULL!	1	1	2	1	1	1	1	1	1	1	1	1	3	2	2	2	1	1	2	2	1	2	4	1	2	1	1	2	2	涂中兴
XH-B09	2014-01-14	2	65	1	2	1	5	1	2	#NULL!	2	#NULL!	#NULL!	3	1	3	3	1	3	3	3	3	3	#NULL!	#NULL!	#NULL!	#NULL!	#NULL!	#NULL!	#NULL!	#NULL!	#NULL!	1	#NULL!	#NULL!	1	1	2	2	胡玉城
WL-B23	2014-01-14	2	65	1	2	2	10	1	2	#NULL!	2	#NULL!	2	3	3	3	3	1	1	1	3	3	3	#NULL!	#NULL!	#NULL!	#NULL!	#NULL!	#NULL!	#NULL!	#NULL!	#NULL!	2	#NULL!	#NULL!	1	3	2	2	汪玮
AYX-B41	2014-01-13	1	65	1	2	2	4	1	2	#NULL!	2	#NULL!	1	1	1	1	1	1	1	1	1	1	2	#NULL!	#NULL!	#NULL!	#NULL!	#NULL!	#NULL!	#NULL!	#NULL!	#NULL!	2	#NULL!	#NULL!	1	1	2	2	肖芸
XJX-B116	2014-01-14	1	65	1	2	2	8	2	2	#NULL!	1	1	2	1	1	1	1	1	1	1	1	1	3	2	2	2	1	2	2	2	1	2	3	1	2	1	1	2	2	涂中兴
XJ-B7	2014-01-14	1	65	1	2	2	9	2	2	#NULL!	1	2	2	1	1	1	1	1	1	1	1	2	2	2	2	2	1	1	2	2	1	2	4	2	4	1	1	1	2	凌荣明
XH-B122	2014-01-12	2	65	1	1	2	4	2	2	#NULL!	1	4	1	1	1	1	1	1	1	1	1	2	2	2	2	2	2	#NULL!	2	2	2	2	2	1	1	1	1	2	2	胡玉城
DH-B085	2014-01-14	1	66	1	2	2	4	1	2	#NULL!	2	#NULL!	1	1	1	1	1	1	1	1	1	2	1	#NULL!	#NULL!	#NULL!	#NULL!	#NULL!	#NULL!	#NULL!	#NULL!	#NULL!	1	#NULL!	#NULL!	1	1	2	2	龙强
DH-B130	2014-01-13	2	66	1	1	2	5	1	2	#NULL!	2	#NULL!	2	1	1	1	1	1	1	1	1	1	3	#NULL!	#NULL!	#NULL!	#NULL!	#NULL!	#NULL!	#NULL!	#NULL!	#NULL!	1	#NULL!	#NULL!	1	1	2	2	郭艳萍
XH-B52	2014-01-14	1	66	1	1	2	9	1	2	#NULL!	2	#NULL!	#NULL!	3	1	1	3	1	3	3	1	3	3	#NULL!	#NULL!	#NULL!	#NULL!	#NULL!	#NULL!	#NULL!	#NULL!	#NULL!	4	#NULL!	#NULL!	1	1	2	2	熊楚妮
XH-B77	2014-01-14	1	66	1	2	2	4	2	2	#NULL!	2	#NULL!	1	1	3	1	3	1	3	1	1	1	3	#NULL!	#NULL!	#NULL!	#NULL!	#NULL!	#NULL!	#NULL!	#NULL!	#NULL!	1	#NULL!	#NULL!	3	3	4	2	熊楚妮
XH-B088	2014-01-12	1	66	1	2	2	4	1	2	#NULL!	1	2	1	1	3	3	3	1	3	3	3	3	3	2	1	1	1	1	2	2	1	1	1	1	1	1	1	4	2	熊楚妮
XH-B096	2014-01-12	1	66	1	3	2	1	1	2	#NULL!	1	2	2	1	3	3	3	1	3	3	3	3	3	1	1	1	1	1	2	2	2	2	#NULL!	1	1	1	1	2	2	熊楚妮
QYP-B53	2014-01-15	2	67	1	2	2	4	1	2	#NULL!	2	#NULL!	1	1	1	1	1	1	1	1	1	1	2	#NULL!	#NULL!	#NULL!	#NULL!	#NULL!	#NULL!	#NULL!	#NULL!	#NULL!	1	#NULL!	#NULL!	1	1	2	2	李洪玲
QYP-B80	2014-01-17	1	67	1	1	2	4	1	2	#NULL!	2	#NULL!	1	1	1	1	1	1	1	1	1	1	1	#NULL!	#NULL!	#NULL!	#NULL!	#NULL!	#NULL!	#NULL!	#NULL!	#NULL!	1	#NULL!	#NULL!	1	1	2	2	张莉
DH-B115	2014-01-12	2	67	1	1	2	8	1	2	#NULL!	1	1	1	3	3	3	3	3	3	3	3	3	3	2	2	2	2	#NULL!	2	2	2	2	2	2	2	1	1	2	2	郭艳萍
DH-B25	2014-01-14	#NULL!	67	1	4	#NULL!	1	2	2	#NULL!	1	2	1	1	1	1	1	1	1	1	1	3	2	2	2	1	1	1	2	2	1	2	1	1	1	1	1	2	2	朱春芳
DH-B5	2014-01-12	2	68	1	4	#NULL!	1	2	2	#NULL!	2	#NULL!	1	1	1	1	1	1	1	3	1	1	3	#NULL!	#NULL!	#NULL!	#NULL!	#NULL!	#NULL!	#NULL!	#NULL!	#NULL!	1	#NULL!	#NULL!	1	1	2	2	朱春芳
310	2013-12-31	1	68	1	2	2	1	2	2	#NULL!	2	#NULL!	#NULL!	1	1	1	1	2	1	3	3	3	1	#NULL!	#NULL!	#NULL!	#NULL!	#NULL!	#NULL!	#NULL!	#NULL!	#NULL!	2	#NULL!	#NULL!	1	1	1	2	郭双莉
231	2013-12-30	1	68	1	3	2	3	4	2	#NULL!	1	1	2	1	1	1	1	1	1	1	1	2	2	2	2	2	2	#NULL!	1	2	1	2	3	1	2	1	1	2	2	郭双莉
DH-B49	2014-01-14	2	68	1	3	1	4	1	2	#NULL!	1	2	2	1	1	1	1	1	1	1	1	3	3	2	2	1	1	1	2	2	2	2	2	2	2	1	1	2	2	朱春芳
XJ-B69	2014-01-14	1	68	1	2	2	8	1	2	#NULL!	1	2	2	1	1	1	1	3	2	3	3	3	3	1	1	1	2	#NULL!	2	2	1	2	2	1	1	1	3	3	2	谢玉庆
WL-B6	2014-01-14	2	69	1	3	2	10	1	2	#NULL!	2	#NULL!	2	3	3	1	3	1	1	1	1	3	2	#NULL!	#NULL!	#NULL!	#NULL!	#NULL!	#NULL!	#NULL!	#NULL!	#NULL!	2	#NULL!	#NULL!	3	3	1	2	饶裕莲
XH-B138	2014-01-13	2	69	1	1	2	7	1	2	#NULL!	1	1	1	2	1	1	3	1	3	3	3	3	3	2	2	2	2	#NULL!	2	2	1	1	2	1	1	1	1	2	2	熊楚妮
QYP-B6	2014-01-14	2	70	1	1	2	3	3	2	#NULL!	2	#NULL!	2	1	1	1	1	1	1	1	1	3	1	#NULL!	#NULL!	#NULL!	#NULL!	#NULL!	#NULL!	#NULL!	#NULL!	#NULL!	2	#NULL!	#NULL!	1	1	2	2	吴海亮
QYP-B93	2014-01-12	2	70	1	2	2	3	1	2	#NULL!	1	1	2	1	1	1	1	1	1	2	2	3	3	2	2	1	1	2	2	2	1	1	1	1	2	1	1	2	2	吴海亮
DH-B27	2014-01-14	2	71	1	2	2	5	1	2	#NULL!	1	2	2	1	1	1	1	1	1	1	1	2	3	2	2	1	1	1	2	2	1	2	1	2	1	1	1	2	2	朱春芳
WL-B7	2014-01-14	1	72	1	1	2	10	1	2	#NULL!	2	#NULL!	2	3	3	1	3	1	1	3	3	3	3	#NULL!	#NULL!	#NULL!	#NULL!	#NULL!	#NULL!	#NULL!	#NULL!	#NULL!	2	#NULL!	#NULL!	3	3	2	2	饶裕莲
HGT-B04	2014-01-14	1	75	1	1	2	9	1	2	#NULL!	1	4	1	1	1	3	1	3	2	2	2	2	2	1	2	1	1	1	1	1	1	1	2	1	2	2	3	2	2	路亮
